# Supplementary material for: Clinical nurses’ work procrastination and smartphone addiction: a potential profile study
Source: Front Psychol. 2024 Jul 31;15:1387288. doi: 10.3389/fpsyg.2024.1387288 (PMC11322127; doi:10.3389/fpsyg.2024.1387288)
Supplement: Supplementary file 1 [file Table_1.XLSX]

## Sheet: Basic Characteristic
1. Number	2. Age	3. Gender	4. Educational levels	5. Marital status	6. Number of children	7. Working years (years)	8. Department	9. Job title	10. Department atmosphere	11. Positions	12. Monthly income(RMB)	13. Promotion of professional title	14. Hospital management
1	24	Female	Undergraduate	Single	0	≤5	Surgical	Primary title	Harmonious	Nurse	＜5000	generally	Strict
2	26	Male	Undergraduate	Single	0	≤5	Emergency, Intensive Care Unit and Operating Room	Primary title	Very harmonious	Nurse	5000-8000	generally	Very strict
3	26	Female	Undergraduate	Single	0	≤5	Surgical	Primary title	Harmonious	Nurse	＜5000	generally	Very strict
4	26	Female	Undergraduate	Single	0	≤5	Internal Medicine	Primary title	Harmonious	Nurse	＜5000	generally	Very strict
5	24	Female	Undergraduate	Single	0	≤5	Internal Medicine	Primary title	generally	Nurse	5000-8000	generally	Strict
6	26	Female	Undergraduate	Single	0	≤5	Emergency, Intensive Care Unit and Operating Room	Primary title	Harmonious	Nurse	＜5000	generally	Strict
8	25	Female	Undergraduate	Single	0	≤5	Outpatient and other	Primary title	Harmonious	Nurse	＜5000	generally	Strict
9	25	Female	Undergraduate	Single	0	≤5	Surgical	Primary title	Harmonious	Nurse	5000-8000	Not smooth	Very strict
10	24	Female	Undergraduate	Single	0	≤5	Obstetrics and Gynecology	Primary title	Harmonious	Nurse	5000-8000	generally	Strict
11	26	Female	Undergraduate	Married	0	≤5	Surgical	Primary title	Very harmonious	Nurse	＜5000	generally	Very strict
12	24	Female	Undergraduate	Single	0	≤5	Emergency, Intensive Care Unit and Operating Room	Primary title	Very harmonious	Nurse	＜5000	generally	Strict
13	26	Female	Undergraduate	Single	0	≤5	Outpatient and other	Primary title	Harmonious	Nurse	＜5000	generally	Strict
14	24	Female	Undergraduate	Single	0	≤5	Internal Medicine	Primary title	Harmonious	Nurse	5000-8000	generally	Strict
16	25	Male	Undergraduate	Single	0	≤5	Emergency, Intensive Care Unit and Operating Room	Primary title	Harmonious	Nurse	>8000	smoothly	Strict
17	25	Female	Undergraduate	Single	0	≤5	Internal Medicine	Primary title	generally	Nurse	>8000	generally	Very strict
18	24	Female	Undergraduate	Single	0	≤5	Internal Medicine	Primary title	Very harmonious	Nurse	＜5000	generally	Very strict
19	26	Female	Undergraduate	Single	0	≤5	Outpatient and other	Primary title	Harmonious	Nurse	5000-8000	smoothly	Strict
20	25	Female	Undergraduate	Single	0	≤5	Pediatrics	Primary title	Very harmonious	Nurse	5000-8000	smoothly	Very strict
22	24	Female	Undergraduate	Single	0	≤5	Outpatient and other	Primary title	Harmonious	Nurse	5000-8000	generally	Strict
23	24	Female	Undergraduate	Single	0	≤5	Internal Medicine	Primary title	Harmonious	Nurse	＜5000	generally	Strict
24	23	Female	Undergraduate	Single	0	≤5	Surgical	Primary title	generally	Nurse	＜5000	generally	Strict
25	26	Male	Undergraduate	Single	0	≤5	Emergency, Intensive Care Unit and Operating Room	Primary title	Harmonious	Nurse	＜5000	generally	Strict
26	26	Female	Undergraduate	Single	0	≤5	Internal Medicine	Primary title	Very harmonious	Nurse	＜5000	generally	generally
28	24	Male	Junior college	Single	0	≤5	Emergency, Intensive Care Unit and Operating Room	Primary title	Very harmonious	Nurse	＜5000	generally	Very strict
29	24	Female	Junior college	Single	0	≤5	Obstetrics and Gynecology	Primary title	Very harmonious	Nurse	5000-8000	generally	Very strict
30	23	Female	Undergraduate	Single	0	≤5	Outpatient and other	Primary title	Harmonious	Nurse	＜5000	generally	Strict
31	26	Female	Undergraduate	Married	0	≤5	Emergency, Intensive Care Unit and Operating Room	Primary title	Very harmonious	Nurse	5000-8000	generally	Very strict
32	25	Female	Undergraduate	Single	0	≤5	Surgical	Primary title	Harmonious	Nurse	5000-8000	smoothly	Strict
34	25	Male	Undergraduate	Single	0	≤5	Emergency, Intensive Care Unit and Operating Room	Primary title	Harmonious	Nurse	＜5000	generally	Very strict
37	25	Female	Undergraduate	Single	0	≤5	Internal Medicine	Primary title	Harmonious	Nurse	5000-8000	Not smooth	Very strict
38	23	Male	Undergraduate	Single	0	≤5	Emergency, Intensive Care Unit and Operating Room	Primary title	Very harmonious	Nurse	5000-8000	generally	Strict
39	26	Female	Undergraduate	Single	0	≤5	Internal Medicine	Primary title	Harmonious	Nurse	＜5000	Not smooth	Very strict
40	25	Female	Undergraduate	Single	0	≤5	Internal Medicine	Primary title	Harmonious	Nurse	＜5000	generally	Strict
41	24	Female	Undergraduate	Single	0	≤5	Outpatient and other	Primary title	Harmonious	Nurse	5000-8000	smoothly	Very strict
42	24	Female	Undergraduate	Single	0	≤5	Emergency, Intensive Care Unit and Operating Room	Primary title	Harmonious	Nurse	>8000	smoothly	Strict
43	24	Female	Undergraduate	Single	0	≤5	Internal Medicine	Primary title	Very harmonious	Nurse	5000-8000	Not smooth	Very strict
44	25	Female	Undergraduate	Single	0	≤5	Surgical	Primary title	Harmonious	Nurse	5000-8000	generally	Strict
45	23	Female	Junior college	Single	0	≤5	Outpatient and other	Primary title	Very harmonious	Nurse	＜5000	generally	Very strict
46	25	Female	Undergraduate	Single	0	≤5	Outpatient and other	Primary title	Harmonious	Nurse	5000-8000	generally	Strict
47	25	Female	Undergraduate	Single	0	≤5	Surgical	Primary title	Harmonious	Nurse	＜5000	smoothly	Strict
48	25	Female	Undergraduate	Single	0	≤5	Internal Medicine	Primary title	Harmonious	Nurse	5000-8000	generally	Very strict
49	26	Female	Undergraduate	Single	0	≤5	Emergency, Intensive Care Unit and Operating Room	Primary title	Harmonious	Nurse	5000-8000	generally	Very strict
50	25	Female	Undergraduate	Single	0	≤5	Outpatient and other	Primary title	Very harmonious	Nurse	＜5000	smoothly	Very strict
51	25	Female	Undergraduate	Single	0	≤5	Outpatient and other	Primary title	Very harmonious	Nurse	5000-8000	smoothly	Strict
52	24	Female	Undergraduate	Single	0	≤5	Internal Medicine	Primary title	Harmonious	Nurse	＜5000	generally	Strict
53	25	Female	Undergraduate	Single	0	≤5	Outpatient and other	Primary title	generally	Nurse	＜5000	generally	Very strict
54	25	Female	Undergraduate	Single	0	≤5	Outpatient and other	Primary title	Harmonious	Nurse	5000-8000	generally	Strict
56	37	Female	Undergraduate	Married	2	＞15	Surgical	Intermediate title	generally	Nurse	＜5000	generally	generally
57	23	Female	Undergraduate	Single	0	≤5	Outpatient and other	Primary title	Very harmonious	Nurse	＜5000	generally	Very strict
58	47	Female	Undergraduate	Married	1	＞15	Emergency, Intensive Care Unit and Operating Room	Senior title	Harmonious	Head nurse	>8000	generally	Very strict
59	30	Female	Undergraduate	Married	1	≤5	Outpatient and other	Primary title	generally	Nurse	>8000	generally	Very strict
60	34	Female	Undergraduate	Married	1	6~10	Outpatient and other	Intermediate title	Harmonious	Nurse	5000-8000	smoothly	Very strict
61	42	Female	Undergraduate	Married	1	＞15	Surgical	Senior title	Very harmonious	Head nurse	>8000	smoothly	Very strict
62	39	Female	Undergraduate	Married	1	11~15	Emergency, Intensive Care Unit and Operating Room	Intermediate title	Harmonious	Nurse	5000-8000	smoothly	Strict
63	32	Female	Undergraduate	Single	0	6~10	Surgical	Primary title	Harmonious	Nurse	5000-8000	generally	Strict
64	36	Female	Undergraduate	Widowed or separated	1	＞15	Emergency, Intensive Care Unit and Operating Room	Primary title	generally	Head nurse	5000-8000	Not smooth	Strict
65	47	Female	Undergraduate	Married	1	＞15	Outpatient and other	Senior title	Very harmonious	Head nurse	>8000	smoothly	Very strict
66	36	Female	Undergraduate	Married	1	11~15	Surgical	Intermediate title	Harmonious	Nurse	＜5000	Not smooth	Very strict
67	32	Female	Undergraduate	Single	0	11~15	Internal Medicine	Primary title	Harmonious	Nurse	5000-8000	Not smooth	Very strict
69	40	Female	Undergraduate	Married	1	11~15	Outpatient and other	Senior title	Harmonious	Head nurse	5000-8000	smoothly	Strict
70	31	Female	Undergraduate	Married	1	6~10	Outpatient and other	Primary title	Very harmonious	Nurse	5000-8000	generally	Strict
71	40	Female	Undergraduate	Married	1	＞15	Surgical	Senior title	Very harmonious	Head nurse	>8000	smoothly	Very strict
72	39	Female	Undergraduate	Married	1	＞15	Surgical	Intermediate title	Harmonious	Head nurse	5000-8000	smoothly	Strict
74	27	Female	Undergraduate	Single	0	≤5	Surgical	Primary title	Very harmonious	Nurse	＜5000	Not smooth	Very strict
75	34	Female	Undergraduate	Married	2	11~15	Surgical	Intermediate title	Very harmonious	Head nurse	5000-8000	smoothly	Strict
76	29	Female	Undergraduate	Single	0	6~10	Outpatient and other	Primary title	Very harmonious	Nurse	＜5000	generally	Strict
78	49	Female	Undergraduate	Married	2	＞15	Emergency, Intensive Care Unit and Operating Room	Intermediate title	generally	Head nurse	＜5000	generally	Strict
79	27	Female	Undergraduate	Married	1	≤5	Outpatient and other	Primary title	Harmonious	Nurse	5000-8000	smoothly	Strict
80	43	Female	Undergraduate	Married	1	＞15	Outpatient and other	Intermediate title	Very harmonious	Nurse	＜5000	Not smooth	Very strict
81	48	Female	Undergraduate	Married	1	＞15	Surgical	Intermediate title	Very harmonious	Head nurse	5000-8000	generally	Very strict
82	23	Female	Junior college	Single	0	≤5	Surgical	Primary title	Very harmonious	Nurse	＜5000	smoothly	Strict
83	39	Female	Undergraduate	Married	2	＞15	Surgical	Intermediate title	Harmonious	Head nurse	5000-8000	generally	Strict
84	33	Female	Undergraduate	Married	1	6~10	Emergency, Intensive Care Unit and Operating Room	Intermediate title	Harmonious	Nurse	5000-8000	Not smooth	Strict
85	38	Female	Undergraduate	Married	2	＞15	Surgical	Intermediate title	Very harmonious	Head nurse	5000-8000	generally	Very strict
86	26	Female	Undergraduate	Single	0	≤5	Outpatient and other	Primary title	Disharmonious	Nurse	＜5000	Not smooth	Very strict
87	30	Female	Junior college	Married	2	≤5	Outpatient and other	Primary title	Very harmonious	Nurse	＜5000	generally	generally
88	26	Female	Undergraduate	Single	0	≤5	Outpatient and other	Primary title	Harmonious	Nurse	＜5000	smoothly	Very strict
89	52	Female	Undergraduate	Married	1	＞15	Emergency, Intensive Care Unit and Operating Room	Senior title	Harmonious	Head nurse	5000-8000	smoothly	Strict
90	20	Female	Undergraduate	Married	1	≤5	Surgical	Primary title	Harmonious	Nurse	＜5000	generally	Very strict
91	44	Female	Junior college	Married	2	＞15	Pediatrics	Intermediate title	Very harmonious	Nurse	＜5000	Not smooth	Very strict
92	52	Female	Junior college	Married	1	＞15	Outpatient and other	Intermediate title	Harmonious	Nurse	5000-8000	smoothly	Strict
93	30	Female	Undergraduate	Married	0	11~15	Emergency, Intensive Care Unit and Operating Room	Primary title	Very harmonious	Nurse	＜5000	Not smooth	Very strict
94	37	Male	Undergraduate	Married	>2个	＞15	Outpatient and other	Intermediate title	Harmonious	Head nurse	＜5000	generally	Very strict
95	40	Female	Undergraduate	Married	0	11~15	Outpatient and other	Intermediate title	generally	Nurse	＜5000	Not smooth	Strict
96	29	Female	Undergraduate	Single	0	6~10	Outpatient and other	Primary title	Very harmonious	Nurse	＜5000	generally	Very strict
97	42	Female	Undergraduate	Married	1	＞15	Outpatient and other	Intermediate title	Harmonious	Head nurse	5000-8000	Not smooth	Very strict
99	32	Female	Undergraduate	Single	0	11~15	Surgical	Intermediate title	Harmonious	Head nurse	>8000	smoothly	Very strict
100	41	Female	Undergraduate	Married	1	＞15	Surgical	Intermediate title	Harmonious	Head nurse	5000-8000	Not smooth	Strict
101	26	Female	Undergraduate	Single	0	≤5	Surgical	Primary title	Very harmonious	Nurse	＜5000	generally	Very strict
104	35	Female	Undergraduate	Married	2	11~15	Surgical	Intermediate title	generally	Nurse	>8000	Not smooth	Very strict
105	36	Female	Undergraduate	Married	2	11~15	Surgical	Intermediate title	Harmonious	Nurse	>8000	smoothly	Strict
106	47	Female	Undergraduate	Married	1	＞15	Surgical	Senior title	Very harmonious	Head nurse	>8000	Not smooth	Very strict
108	38	Female	Undergraduate	Married	2	11~15	Internal Medicine	Intermediate title	Very harmonious	Head nurse	5000-8000	smoothly	Very strict
109	38	Female	Undergraduate	Married	1	＞15	Internal Medicine	Intermediate title	generally	Head nurse	＜5000	generally	Strict
110	41	Female	Undergraduate	Married	2	＞15	Internal Medicine	Intermediate title	Very harmonious	Head nurse	5000-8000	Not smooth	Very strict
111	37	Female	Undergraduate	Married	1	11~15	Outpatient and other	Intermediate title	Harmonious	Nurse	5000-8000	Not smooth	generally
112	35	Female	Undergraduate	Married	2	11~15	Pediatrics	Intermediate title	Very harmonious	Nurse	5000-8000	smoothly	Very strict
113	36	Female	Undergraduate	Married	1	11~15	Surgical	Intermediate title	Very harmonious	Nurse	5000-8000	smoothly	Very strict
114	31	Female	Undergraduate	Single	0	6~10	Internal Medicine	Primary title	Very harmonious	Nurse	＜5000	smoothly	Very strict
115	39	Female	Undergraduate	Married	1	＞15	Internal Medicine	Intermediate title	Very harmonious	Head nurse	5000-8000	smoothly	Very strict
116	28	Female	Undergraduate	Married	1	≤5	Outpatient and other	Primary title	Very harmonious	Nurse	5000-8000	smoothly	Strict
117	28	Female	Undergraduate	Married	0	6~10	Emergency, Intensive Care Unit and Operating Room	Primary title	Harmonious	Nurse	5000-8000	generally	Strict
118	40	Female	Undergraduate	Married	1	＞15	Emergency, Intensive Care Unit and Operating Room	Intermediate title	Very harmonious	Head nurse	5000-8000	smoothly	Strict
121	35	Female	Undergraduate	Married	2	11~15	Emergency, Intensive Care Unit and Operating Room	Intermediate title	Very harmonious	Head nurse	5000-8000	smoothly	Strict
122	46	Female	Undergraduate	Married	1	＞15	Surgical	Senior title	Very harmonious	Head nurse	>8000	smoothly	Strict
123	49	Female	Junior college	Married	1	＞15	Outpatient and other	Intermediate title	Very harmonious	Nurse	＜5000	Not smooth	Strict
124	52	Female	Undergraduate	Married	1	＞15	Outpatient and other	Intermediate title	Very harmonious	Nurse	5000-8000	generally	Strict
125	36	Female	Undergraduate	Married	1	＞15	Emergency, Intensive Care Unit and Operating Room	Intermediate title	Harmonious	Head nurse	5000-8000	smoothly	Strict
127	47	Female	Undergraduate	Married	1	＞15	Surgical	Senior title	Very harmonious	Head nurse	5000-8000	smoothly	Very strict
128	33	Female	Junior college	Married	1	6~10	Internal Medicine	Primary title	Very harmonious	Nurse	5000-8000	smoothly	Strict
129	38	Female	Undergraduate	Widowed or separated	0	11~15	Surgical	Intermediate title	Harmonious	Nurse	5000-8000	Not smooth	Very strict
130	46	Female	Undergraduate	Married	1	＞15	Pediatrics	Senior title	Very harmonious	Head nurse	5000-8000	generally	Very strict
131	44	Female	Undergraduate	Married	1	＞15	Surgical	Intermediate title	Very harmonious	Head nurse	＜5000	generally	Very strict
132	38	Female	Undergraduate	Married	2	11~15	Outpatient and other	Primary title	Very harmonious	Nurse	5000-8000	Not smooth	Very strict
133	56	Female	Junior college	Married	1	＞15	Outpatient and other	Primary title	Very harmonious	Nurse	＜5000	generally	Strict
134	26	Female	Junior college	Single	0	≤5	Outpatient and other	Primary title	Harmonious	Nurse	＜5000	smoothly	Very strict
135	40	Female	Undergraduate	Married	2	＞15	Internal Medicine	Senior title	Harmonious	Head nurse	5000-8000	smoothly	Very strict
136	39	Male	Junior college	Married	1	＞15	Emergency, Intensive Care Unit and Operating Room	Intermediate title	Very harmonious	Nurse	5000-8000	Not smooth	Very strict
137	31	Female	Undergraduate	Married	2	11~15	Surgical	Intermediate title	Harmonious	Nurse	5000-8000	generally	Very strict
138	29	Female	Undergraduate	Single	0	≤5	Surgical	Primary title	Very harmonious	Nurse	5000-8000	generally	Strict
140	40	Female	Undergraduate	Married	2	＞15	Outpatient and other	Intermediate title	generally	Head nurse	5000-8000	Not smooth	Very strict
142	33	Male	Undergraduate	Married	1	11~15	Outpatient and other	Intermediate title	generally	Nurse	5000-8000	smoothly	Very strict
143	41	Female	Undergraduate	Married	1	＞15	Internal Medicine	Senior title	Very harmonious	Head nurse	>8000	smoothly	Strict
144	40	Female	Undergraduate	Married	2	＞15	Outpatient and other	Senior title	Very harmonious	Head nurse	>8000	smoothly	Very strict
145	40	Female	Undergraduate	Married	2	＞15	Internal Medicine	Intermediate title	Very harmonious	Head nurse	>8000	generally	Very strict
146	35	Female	Undergraduate	Married	1	11~15	Outpatient and other	Primary title	Very harmonious	Nurse	＜5000	generally	Very strict
147	29	Female	Undergraduate	Married	1	6~10	Surgical	Primary title	Very harmonious	Nurse	5000-8000	smoothly	Strict
148	32	Female	Undergraduate	Married	0	6~10	Internal Medicine	Intermediate title	Harmonious	Nurse	5000-8000	smoothly	Very strict
149	39	Female	Undergraduate	Married	2	＞15	Surgical	Senior title	Very harmonious	Head nurse	5000-8000	smoothly	Very strict
150	36	Female	Undergraduate	Single	0	11~15	Outpatient and other	Intermediate title	Very harmonious	Nurse	5000-8000	generally	Very strict
151	31	Female	Undergraduate	Married	1	6~10	Emergency, Intensive Care Unit and Operating Room	Primary title	Harmonious	Nurse	＜5000	smoothly	Strict
152	35	Female	Undergraduate	Married	>2个	11~15	Pediatrics	Primary title	Very harmonious	Nurse	5000-8000	smoothly	Strict
153	41	Female	Undergraduate	Married	2	＞15	Internal Medicine	Senior title	Very harmonious	Head nurse	5000-8000	smoothly	Strict
154	30	Female	Undergraduate	Single	0	≤5	Internal Medicine	Primary title	Very harmonious	Nurse	5000-8000	generally	Very strict
155	30	Female	Undergraduate	Married	0	6~10	Internal Medicine	Intermediate title	Very harmonious	Nurse	5000-8000	smoothly	Strict
158	29	Female	Undergraduate	Married	1	6~10	Outpatient and other	Primary title	Very harmonious	Nurse	5000-8000	smoothly	Very strict
159	36	Female	Undergraduate	Married	2	11~15	Surgical	Intermediate title	Harmonious	Nurse	5000-8000	generally	Very strict
160	38	Female	Undergraduate	Married	2	11~15	Internal Medicine	Intermediate title	generally	Nurse	＜5000	generally	Strict
161	36	Female	Undergraduate	Married	2	11~15	Outpatient and other	Primary title	Harmonious	Nurse	5000-8000	smoothly	Strict
162	40	Female	Undergraduate	Married	2	＞15	Surgical	Senior title	Harmonious	Nurse	>8000	smoothly	Very strict
163	31	Female	Undergraduate	Married	2	6~10	Surgical	Primary title	Very harmonious	Nurse	＜5000	Not smooth	Very strict
164	37	Female	Undergraduate	Married	1	＞15	Emergency, Intensive Care Unit and Operating Room	Intermediate title	Very harmonious	Nurse	5000-8000	generally	Strict
165	37	Female	Undergraduate	Married	1	＞15	Internal Medicine	Intermediate title	Very harmonious	Head nurse	5000-8000	smoothly	Strict
166	28	Female	Undergraduate	Single	0	≤5	Surgical	Primary title	Harmonious	Nurse	5000-8000	generally	Very strict
167	40	Female	Undergraduate	Married	0	11~15	Outpatient and other	Intermediate title	Harmonious	Head nurse	5000-8000	smoothly	Very strict
168	42	Female	Undergraduate	Married	2	＞15	Obstetrics and Gynecology	Intermediate title	Very harmonious	Head nurse	>8000	generally	Very strict
169	26	Female	Undergraduate	Married	0	≤5	Emergency, Intensive Care Unit and Operating Room	Primary title	Very harmonious	Nurse	＜5000	generally	Strict
170	33	Female	Undergraduate	Married	2	11~15	Internal Medicine	Primary title	generally	Nurse	＜5000	generally	Very strict
171	34	Female	Junior college	Widowed or separated	1	11~15	Outpatient and other	Primary title	generally	Nurse	5000-8000	generally	Very strict
172	28	Female	Undergraduate	Single	0	≤5	Internal Medicine	Primary title	Harmonious	Nurse	5000-8000	generally	Strict
173	30	Female	Undergraduate	Married	1	6~10	Internal Medicine	Intermediate title	Harmonious	Nurse	＜5000	smoothly	Very strict
174	40	Female	Undergraduate	Married	1	＞15	Surgical	Intermediate title	Very harmonious	Head nurse	5000-8000	Not smooth	Strict
175	40	Female	Undergraduate	Married	2	＞15	Internal Medicine	Senior title	Very harmonious	Head nurse	5000-8000	generally	Very strict
176	32	Female	Undergraduate	Single	0	6~10	Outpatient and other	Intermediate title	Harmonious	Nurse	5000-8000	generally	Very strict
177	35	Female	Undergraduate	Married	1	11~15	Outpatient and other	Intermediate title	Harmonious	Head nurse	5000-8000	smoothly	Very strict
178	35	Female	Undergraduate	Married	1	11~15	Internal Medicine	Intermediate title	generally	Nurse	>8000	generally	Very strict
179	35	Female	Undergraduate	Married	1	11~15	Outpatient and other	Intermediate title	Very harmonious	Nurse	5000-8000	smoothly	Strict
180	26	Female	Undergraduate	Single	0	≤5	Outpatient and other	Primary title	generally	Nurse	5000-8000	Not smooth	Very strict
181	32	Female	Undergraduate	Married	1	≤5	Surgical	Primary title	Harmonious	Nurse	5000-8000	generally	Very strict
182	35	Female	Undergraduate	Single	0	11~15	Outpatient and other	Intermediate title	Harmonious	Nurse	5000-8000	smoothly	Very strict
183	32	Female	Undergraduate	Married	2	6~10	Internal Medicine	Intermediate title	Very harmonious	Nurse	5000-8000	smoothly	Very strict
184	58	Female	Junior college	Married	1	＞15	Outpatient and other	Senior title	Very harmonious	Nurse	>8000	smoothly	Very strict
185	26	Female	Undergraduate	Single	0	≤5	Internal Medicine	Primary title	Very harmonious	Nurse	5000-8000	smoothly	Strict
186	52	Female	Undergraduate	Widowed or separated	1	＞15	Outpatient and other	Intermediate title	Very harmonious	Nurse	5000-8000	generally	Strict
188	28	Female	Undergraduate	Single	0	≤5	Outpatient and other	Primary title	Harmonious	Nurse	5000-8000	smoothly	Very strict
190	39	Female	Undergraduate	Married	1	＞15	Outpatient and other	Primary title	Harmonious	Nurse	5000-8000	generally	Very strict
191	38	Female	Undergraduate	Married	2	11~15	Outpatient and other	Primary title	Very harmonious	Nurse	＜5000	Not smooth	Very strict
192	55	Female	Undergraduate	Married	1	＞15	Outpatient and other	Senior title	Harmonious	Nurse	>8000	generally	Strict
193	43	Female	Undergraduate	Married	1	＞15	Internal Medicine	Senior title	generally	Head nurse	>8000	generally	Strict
194	35	Female	Undergraduate	Married	2	11~15	Outpatient and other	Intermediate title	Very harmonious	Nurse	5000-8000	smoothly	Very strict
196	40	Female	Undergraduate	Married	1	＞15	Outpatient and other	Intermediate title	generally	Nurse	5000-8000	generally	Very strict
197	27	Female	Undergraduate	Single	0	≤5	Internal Medicine	Primary title	Very harmonious	Nurse	5000-8000	generally	Very strict
198	32	Female	Undergraduate	Married	1	11~15	Surgical	Intermediate title	Very harmonious	Nurse	5000-8000	smoothly	Very strict
199	39	Female	Undergraduate	Married	2	＞15	Outpatient and other	Intermediate title	Very harmonious	Head nurse	5000-8000	Not smooth	Very strict
200	52	Female	Undergraduate	Married	1	＞15	Outpatient and other	Intermediate title	Harmonious	Nurse	＜5000	smoothly	Very strict
201	31	Female	Undergraduate	Married	2	11~15	Outpatient and other	Primary title	generally	Nurse	＜5000	generally	Very strict
202	30	Female	Undergraduate	Single	0	6~10	Outpatient and other	Primary title	generally	Nurse	＜5000	generally	Strict
203	38	Female	Undergraduate	Married	2	11~15	Surgical	Intermediate title	Very harmonious	Head nurse	＜5000	Not smooth	Very strict
204	42	Female	Undergraduate	Married	2	＞15	Surgical	Intermediate title	Harmonious	Head nurse	5000-8000	generally	Strict
205	35	Female	Undergraduate	Married	1	11~15	Outpatient and other	Primary title	Harmonious	Nurse	＜5000	generally	Strict
206	37	Female	Undergraduate	Married	0	11~15	Outpatient and other	Primary title	Very harmonious	Nurse	5000-8000	smoothly	Strict
207	39	Female	Undergraduate	Married	2	11~15	Internal Medicine	Intermediate title	Very harmonious	Head nurse	5000-8000	smoothly	Very strict
208	30	Female	Undergraduate	Married	1	6~10	Outpatient and other	Primary title	Very harmonious	Nurse	＜5000	generally	Strict
209	42	Female	Undergraduate	Married	1	＞15	Internal Medicine	Intermediate title	Harmonious	Head nurse	>8000	generally	Strict
210	42	Female	Undergraduate	Married	2	＞15	Outpatient and other	Senior title	Harmonious	Head nurse	>8000	generally	Strict
211	32	Female	Undergraduate	Married	2	6~10	Surgical	Primary title	Very harmonious	Nurse	5000-8000	Not smooth	Very strict
212	33	Female	Undergraduate	Married	1	6~10	Surgical	Primary title	Harmonious	Nurse	5000-8000	smoothly	Strict
213	23	Female	Undergraduate	Single	0	≤5	Obstetrics and Gynecology	Primary title	Very harmonious	Nurse	＜5000	generally	Very strict
214	33	Female	Undergraduate	Married	1	6~10	Emergency, Intensive Care Unit and Operating Room	Primary title	Harmonious	Nurse	＜5000	generally	Strict
215	36	Female	Undergraduate	Married	2	＞15	Outpatient and other	Intermediate title	Very harmonious	Nurse	5000-8000	generally	Strict
216	34	Female	Undergraduate	Married	2	11~15	Outpatient and other	Primary title	Very harmonious	Nurse	5000-8000	generally	Very strict
217	33	Female	Undergraduate	Married	1	11~15	Emergency, Intensive Care Unit and Operating Room	Primary title	Very harmonious	Nurse	5000-8000	smoothly	Very strict
218	37	Female	Undergraduate	Married	2	11~15	Internal Medicine	Intermediate title	Harmonious	Head nurse	5000-8000	smoothly	Very strict
219	39	Female	Undergraduate	Married	2	11~15	Internal Medicine	Intermediate title	Harmonious	Head nurse	5000-8000	smoothly	Strict
220	35	Female	Undergraduate	Single	0	11~15	Surgical	Intermediate title	Harmonious	Nurse	5000-8000	generally	Very strict
221	41	Female	Undergraduate	Married	1	11~15	Pediatrics	Intermediate title	Harmonious	Head nurse	5000-8000	Not smooth	Very strict
222	38	Female	Undergraduate	Married	2	＞15	Outpatient and other	Intermediate title	Very harmonious	Nurse	5000-8000	smoothly	Very strict
224	40	Female	Junior college	Married	2	11~15	Outpatient and other	Intermediate title	Very harmonious	Nurse	5000-8000	smoothly	Very strict
225	39	Female	Undergraduate	Married	1	6~10	Outpatient and other	Intermediate title	Very harmonious	Nurse	5000-8000	Not smooth	Very strict
226	39	Female	Undergraduate	Married	2	＞15	Internal Medicine	Intermediate title	Harmonious	Nurse	5000-8000	Not smooth	Strict
228	28	Female	Undergraduate	Single	0	≤5	Emergency, Intensive Care Unit and Operating Room	Primary title	Harmonious	Nurse	5000-8000	generally	Strict
229	33	Female	Undergraduate	Single	0	11~15	Emergency, Intensive Care Unit and Operating Room	Primary title	Very harmonious	Nurse	＜5000	generally	Very strict
230	33	Female	Undergraduate	Married	1	11~15	Internal Medicine	Intermediate title	Very harmonious	Nurse	5000-8000	smoothly	Very strict
231	38	Female	Undergraduate	Married	2	11~15	Outpatient and other	Intermediate title	Harmonious	Nurse	5000-8000	generally	Strict
233	26	Female	Undergraduate	Single	0	≤5	Outpatient and other	Primary title	Harmonious	Nurse	5000-8000	Not smooth	Strict
234	36	Female	Undergraduate	Married	1	11~15	Outpatient and other	Primary title	Very harmonious	Nurse	5000-8000	smoothly	Strict
235	28	Female	Undergraduate	Single	0	6~10	Outpatient and other	Primary title	Very harmonious	Nurse	5000-8000	Not smooth	Very strict
236	28	Female	Undergraduate	Single	0	≤5	Emergency, Intensive Care Unit and Operating Room	Primary title	Harmonious	Nurse	5000-8000	generally	Very strict
237	27	Female	Undergraduate	Married	0	≤5	Emergency, Intensive Care Unit and Operating Room	Primary title	Harmonious	Nurse	5000-8000	generally	Strict
238	32	Female	Junior college	Married	1	6~10	Emergency, Intensive Care Unit and Operating Room	Primary title	generally	Nurse	＜5000	Not smooth	Strict
239	30	Female	Undergraduate	Married	1	6~10	Emergency, Intensive Care Unit and Operating Room	Primary title	Very harmonious	Nurse	5000-8000	smoothly	Very strict
240	42	Female	Junior college	Married	2	＞15	Internal Medicine	Intermediate title	Very harmonious	Head nurse	5000-8000	smoothly	Very strict
242	29	Female	Undergraduate	Married	2	6~10	Emergency, Intensive Care Unit and Operating Room	Primary title	generally	Nurse	＜5000	generally	Strict
244	37	Female	Undergraduate	Married	1	11~15	Emergency, Intensive Care Unit and Operating Room	Primary title	Very harmonious	Nurse	＜5000	smoothly	Very strict
245	32	Female	Undergraduate	Married	1	6~10	Emergency, Intensive Care Unit and Operating Room	Primary title	Very harmonious	Nurse	5000-8000	generally	Very strict
246	52	Female	Undergraduate	Married	1	＞15	Surgical	Intermediate title	Harmonious	Nurse	＜5000	Not smooth	Strict
247	27	Female	Undergraduate	Married	1	≤5	Internal Medicine	Primary title	Harmonious	Nurse	5000-8000	generally	Strict
248	39	Male	Undergraduate	Married	1	11~15	Emergency, Intensive Care Unit and Operating Room	Intermediate title	Very harmonious	Head nurse	5000-8000	generally	Strict
249	26	Female	Junior college	Married	1	≤5	Emergency, Intensive Care Unit and Operating Room	Primary title	Harmonious	Nurse	＜5000	smoothly	generally
250	26	Female	Undergraduate	Single	0	≤5	Outpatient and other	Primary title	Very harmonious	Nurse	>8000	smoothly	Very strict
251	32	Male	Undergraduate	Married	0	11~15	Emergency, Intensive Care Unit and Operating Room	Intermediate title	Very harmonious	Nurse	5000-8000	generally	generally
252	25	Male	Undergraduate	Single	0	≤5	Emergency, Intensive Care Unit and Operating Room	Primary title	Very harmonious	Nurse	>8000	smoothly	Strict
253	43	Male	Junior college	Single	0	＞15	Outpatient and other	Primary title	Harmonious	Nurse	5000-8000	smoothly	Very strict
254	32	Female	Junior college	Married	2	11~15	Outpatient and other	Intermediate title	Very harmonious	Nurse	5000-8000	smoothly	Very strict
256	46	Female	Undergraduate	Married	2	＞15	Internal Medicine	Senior title	Very harmonious	Head nurse	>8000	smoothly	Strict
257	34	Female	Undergraduate	Married	1	11~15	Outpatient and other	Intermediate title	Harmonious	Nurse	＜5000	Not smooth	Strict
258	29	Female	Undergraduate	Married	1	6~10	Outpatient and other	Primary title	Harmonious	Nurse	5000-8000	smoothly	Very strict
261	35	Female	Undergraduate	Married	2	11~15	Internal Medicine	Intermediate title	Very harmonious	Head nurse	5000-8000	smoothly	Strict
262	41	Female	Undergraduate	Married	2	＞15	Internal Medicine	Intermediate title	Very harmonious	Head nurse	5000-8000	generally	Very strict
263	32	Female	Undergraduate	Married	2	6~10	Pediatrics	Intermediate title	Harmonious	Nurse	5000-8000	generally	Strict
264	30	Female	Undergraduate	Single	0	6~10	Emergency, Intensive Care Unit and Operating Room	Primary title	Harmonious	Nurse	＜5000	Not smooth	Strict
265	31	Female	Undergraduate	Married	2	6~10	Internal Medicine	Primary title	Very harmonious	Nurse	＜5000	generally	Strict
266	54	Female	Junior college	Married	1	＞15	Outpatient and other	Primary title	Harmonious	Nurse	＜5000	Not smooth	Strict
267	37	Female	Undergraduate	Married	1	11~15	Emergency, Intensive Care Unit and Operating Room	Intermediate title	Very harmonious	Nurse	5000-8000	Not smooth	Strict
268	36	Female	Undergraduate	Married	2	11~15	Surgical	Intermediate title	Very harmonious	Nurse	5000-8000	generally	Very strict
269	35	Female	Undergraduate	Married	0	11~15	Internal Medicine	Intermediate title	Harmonious	Head nurse	5000-8000	Not smooth	Strict
270	28	Male	Undergraduate	Married	1	6~10	Emergency, Intensive Care Unit and Operating Room	Primary title	Harmonious	Nurse	＜5000	generally	Strict
271	39	Female	Undergraduate	Married	1	＞15	Outpatient and other	Intermediate title	Very harmonious	Nurse	5000-8000	Not smooth	Very strict
273	39	Female	Undergraduate	Married	2	＞15	Outpatient and other	Intermediate title	Harmonious	Head nurse	>8000	Not smooth	Strict
274	45	Female	Undergraduate	Married	2	＞15	Pediatrics	Intermediate title	Very harmonious	Nurse	5000-8000	Not smooth	Strict
275	38	Female	Undergraduate	Married	1	＞15	Outpatient and other	Intermediate title	generally	Nurse	＜5000	generally	generally
277	38	Female	Undergraduate	Married	2	＞15	Internal Medicine	Intermediate title	Harmonious	Head nurse	＜5000	smoothly	Strict
278	58	Female	Junior college	Married	2	＞15	Outpatient and other	Intermediate title	Harmonious	Nurse	5000-8000	Not smooth	Very strict
279	26	Female	Undergraduate	Single	0	≤5	Emergency, Intensive Care Unit and Operating Room	Primary title	Harmonious	Nurse	5000-8000	smoothly	Strict
280	37	Female	Undergraduate	Married	1	11~15	Emergency, Intensive Care Unit and Operating Room	Primary title	Very harmonious	Nurse	＜5000	smoothly	Strict
281	36	Female	Undergraduate	Married	1	11~15	Internal Medicine	Intermediate title	Harmonious	Nurse	5000-8000	smoothly	Very strict
283	30	Male	Undergraduate	Single	0	6~10	Emergency, Intensive Care Unit and Operating Room	Primary title	Very harmonious	Nurse	5000-8000	smoothly	Strict
284	48	Female	Undergraduate	Married	2	＞15	Internal Medicine	Senior title	Very harmonious	Head nurse	5000-8000	smoothly	Strict
285	36	Female	Junior college	Married	1	6~10	Outpatient and other	Primary title	Harmonious	Nurse	＜5000	generally	Strict
286	39	Female	Undergraduate	Married	1	＞15	Internal Medicine	Intermediate title	Very harmonious	Head nurse	＜5000	generally	Very strict
287	30	Female	Undergraduate	Single	0	6~10	Internal Medicine	Primary title	Harmonious	Nurse	5000-8000	smoothly	Strict
288	54	Female	Junior college	Married	1	＞15	Obstetrics and Gynecology	Intermediate title	Harmonious	Nurse	5000-8000	generally	Strict
289	24	Female	Undergraduate	Single	0	≤5	Internal Medicine	Primary title	Harmonious	Nurse	5000-8000	smoothly	Strict
290	46	Female	Undergraduate	Married	0	＞15	Outpatient and other	Primary title	Harmonious	Nurse	5000-8000	generally	Very strict
292	30	Female	Undergraduate	Married	0	6~10	Internal Medicine	Intermediate title	Harmonious	Nurse	5000-8000	Not smooth	Very strict
293	29	Female	Undergraduate	Married	1	≤5	Emergency, Intensive Care Unit and Operating Room	Primary title	Very harmonious	Nurse	5000-8000	smoothly	Very strict
294	43	Female	Undergraduate	Married	2	＞15	Outpatient and other	Intermediate title	Harmonious	Head nurse	5000-8000	generally	Very strict
296	36	Female	Undergraduate	Married	1	11~15	Internal Medicine	Intermediate title	Very harmonious	Nurse	5000-8000	smoothly	Very strict
297	27	Female	Undergraduate	Married	1	≤5	Outpatient and other	Primary title	Very harmonious	Nurse	＜5000	smoothly	Very strict
298	45	Female	Junior college	Married	1	＞15	Outpatient and other	Primary title	Very harmonious	Nurse	5000-8000	smoothly	generally
299	30	Female	Junior college	Single	0	6~10	Internal Medicine	Primary title	Very harmonious	Nurse	5000-8000	generally	Strict
300	34	Female	Undergraduate	Widowed or separated	1	11~15	Outpatient and other	Primary title	generally	Nurse	5000-8000	generally	Very strict
302	47	Female	Undergraduate	Married	1	＞15	Outpatient and other	Senior title	Very harmonious	Head nurse	5000-8000	smoothly	Strict
303	42	Female	Undergraduate	Married	2	＞15	Surgical	Senior title	Harmonious	Head nurse	>8000	smoothly	generally
304	36	Female	Undergraduate	Married	1	11~15	Outpatient and other	Primary title	Very harmonious	Nurse	5000-8000	smoothly	generally
305	40	Female	Undergraduate	Married	2	11~15	Internal Medicine	Intermediate title	Very harmonious	Nurse	5000-8000	generally	Very strict
306	48	Female	Undergraduate	Married	1	＞15	Outpatient and other	Intermediate title	Harmonious	Nurse	5000-8000	generally	Strict
307	34	Female	Undergraduate	Married	1	11~15	Outpatient and other	Intermediate title	Very harmonious	Head nurse	＜5000	smoothly	Strict
308	30	Female	Undergraduate	Married	1	6~10	Outpatient and other	Intermediate title	Harmonious	Nurse	5000-8000	smoothly	Strict
309	36	Female	Undergraduate	Married	1	11~15	Outpatient and other	Primary title	generally	Nurse	＜5000	generally	Very strict
310	23	Female	Undergraduate	Single	0	≤5	Surgical	Primary title	Harmonious	Nurse	>8000	generally	Strict
311	40	Female	Undergraduate	Married	2	11~15	Internal Medicine	Intermediate title	Harmonious	Nurse	5000-8000	generally	Very strict
313	36	Female	Undergraduate	Married	1	11~15	Outpatient and other	Intermediate title	generally	Nurse	>8000	Not smooth	generally
317	31	Female	Undergraduate	Married	1	6~10	Pediatrics	Primary title	Harmonious	Nurse	5000-8000	generally	Strict
318	29	Female	Undergraduate	Married	0	6~10	Outpatient and other	Primary title	Very harmonious	Nurse	＜5000	generally	Very strict
319	39	Female	Undergraduate	Married	2	＞15	Outpatient and other	Intermediate title	Very harmonious	Nurse	＜5000	generally	Very strict
320	30	Female	Undergraduate	Married	1	6~10	Outpatient and other	Intermediate title	Harmonious	Nurse	＜5000	generally	Very strict
321	51	Female	Junior college	Married	1	＞15	Outpatient and other	Intermediate title	Very harmonious	Head nurse	5000-8000	Not smooth	Strict
322	38	Female	Undergraduate	Married	1	11~15	Outpatient and other	Intermediate title	Very harmonious	Nurse	＜5000	generally	Very strict
323	26	Female	Undergraduate	Single	0	≤5	Surgical	Primary title	Very harmonious	Nurse	5000-8000	generally	Very strict
324	27	Female	Undergraduate	Married	1	6~10	Outpatient and other	Intermediate title	Very harmonious	Nurse	＜5000	generally	Strict
325	28	Female	Undergraduate	Single	0	≤5	Emergency, Intensive Care Unit and Operating Room	Primary title	Harmonious	Nurse	5000-8000	smoothly	Very strict
326	24	Female	Undergraduate	Single	0	≤5	Outpatient and other	Primary title	Harmonious	Nurse	＜5000	generally	Strict
327	50	Female	Undergraduate	Married	1	＞15	Obstetrics and Gynecology	Senior title	Very harmonious	Head nurse	5000-8000	smoothly	Strict
328	30	Female	Undergraduate	Single	0	6~10	Outpatient and other	Primary title	Harmonious	Nurse	5000-8000	generally	Strict
329	39	Female	Undergraduate	Married	1	＞15	Emergency, Intensive Care Unit and Operating Room	Intermediate title	Very harmonious	Nurse	5000-8000	Not smooth	Strict
330	36	Female	Undergraduate	Married	2	11~15	Outpatient and other	Primary title	Harmonious	Nurse	5000-8000	generally	Strict
331	28	Female	Undergraduate	Married	0	6~10	Outpatient and other	Primary title	Very harmonious	Nurse	＜5000	generally	Strict
332	35	Female	Undergraduate	Married	1	11~15	Surgical	Intermediate title	generally	Nurse	5000-8000	Not smooth	Very strict
333	51	Female	Undergraduate	Married	1	＞15	Outpatient and other	Senior title	Very harmonious	Head nurse	5000-8000	smoothly	Strict
334	30	Female	Undergraduate	Married	1	6~10	Outpatient and other	Primary title	Harmonious	Nurse	＜5000	generally	Strict
335	33	Female	Undergraduate	Married	1	11~15	Internal Medicine	Primary title	Very harmonious	Nurse	5000-8000	smoothly	Strict
337	29	Female	Undergraduate	Married	0	6~10	Outpatient and other	Primary title	Harmonious	Nurse	＜5000	Not smooth	Strict
339	35	Female	Undergraduate	Married	1	11~15	Emergency, Intensive Care Unit and Operating Room	Intermediate title	Very harmonious	Head nurse	>8000	smoothly	Strict
340	34	Female	Undergraduate	Married	2	11~15	Emergency, Intensive Care Unit and Operating Room	Primary title	Harmonious	Nurse	5000-8000	Not smooth	Strict
341	27	Female	Undergraduate	Single	0	6~10	Outpatient and other	Primary title	Harmonious	Nurse	＜5000	Not smooth	Very strict
342	37	Female	Undergraduate	Married	2	11~15	Emergency, Intensive Care Unit and Operating Room	Intermediate title	Harmonious	Nurse	>8000	generally	Strict
344	30	Female	Undergraduate	Married	1	6~10	Outpatient and other	Primary title	Very harmonious	Nurse	＜5000	generally	Strict
345	35	Female	Undergraduate	Married	2	11~15	Surgical	Intermediate title	Harmonious	Nurse	5000-8000	generally	Strict
346	32	Female	Undergraduate	Married	2	6~10	Outpatient and other	Primary title	Harmonious	Nurse	5000-8000	generally	Strict
347	38	Female	Undergraduate	Married	2	11~15	Outpatient and other	Intermediate title	Very harmonious	Nurse	＜5000	Not smooth	Very strict
348	36	Male	Undergraduate	Married	2	11~15	Emergency, Intensive Care Unit and Operating Room	Intermediate title	Harmonious	Nurse	5000-8000	smoothly	Strict
350	44	Female	Undergraduate	Married	2	＞15	Outpatient and other	Senior title	generally	Nurse	＜5000	Not smooth	Very strict
351	27	Female	Junior college	Married	0	≤5	Internal Medicine	Primary title	Harmonious	Nurse	5000-8000	smoothly	Strict
352	33	Female	Undergraduate	Married	1	11~15	Emergency, Intensive Care Unit and Operating Room	Intermediate title	Very harmonious	Nurse	>8000	smoothly	Strict
353	36	Female	Undergraduate	Married	2	11~15	Outpatient and other	Intermediate title	Very harmonious	Nurse	＜5000	Not smooth	Very strict
354	32	Female	Undergraduate	Married	1	6~10	Obstetrics and Gynecology	Primary title	Harmonious	Nurse	5000-8000	Not smooth	Strict
355	44	Female	Undergraduate	Married	2	＞15	Obstetrics and Gynecology	Intermediate title	Very harmonious	Head nurse	5000-8000	generally	Strict
356	33	Female	Undergraduate	Married	2	11~15	Outpatient and other	Primary title	Harmonious	Nurse	5000-8000	smoothly	Very strict
357	35	Female	Undergraduate	Married	2	＞15	Internal Medicine	Senior title	Harmonious	Head nurse	5000-8000	smoothly	Strict
358	43	Female	Junior college	Married	2	＞15	Outpatient and other	Intermediate title	Harmonious	Nurse	5000-8000	smoothly	Very strict
359	36	Female	Undergraduate	Married	2	11~15	Surgical	Intermediate title	Harmonious	Head nurse	>8000	Not smooth	Very strict
360	35	Female	Undergraduate	Married	2	6~10	Obstetrics and Gynecology	Primary title	Very harmonious	Nurse	＜5000	generally	Strict
361	36	Female	Undergraduate	Married	1	11~15	Surgical	Intermediate title	Very harmonious	Head nurse	5000-8000	generally	Very strict
362	59	Female	Undergraduate	Married	1	＞15	Outpatient and other	Senior title	Very harmonious	Nurse	5000-8000	smoothly	Very strict
363	53	Female	Undergraduate	Married	1	＞15	Outpatient and other	Senior title	Very harmonious	Head nurse	5000-8000	smoothly	Strict
365	47	Female	Undergraduate	Married	1	＞15	Surgical	Intermediate title	Very harmonious	Head nurse	5000-8000	generally	Strict
366	35	Female	Undergraduate	Married	1	11~15	Surgical	Intermediate title	Very harmonious	Nurse	5000-8000	generally	Very strict
368	36	Female	Undergraduate	Married	2	11~15	Pediatrics	Intermediate title	Very harmonious	Nurse	5000-8000	generally	Very strict
369	36	Female	Undergraduate	Married	2	11~15	Outpatient and other	Intermediate title	Harmonious	Nurse	5000-8000	generally	Very strict
370	34	Female	Undergraduate	Married	1	6~10	Internal Medicine	Intermediate title	Harmonious	Nurse	5000-8000	smoothly	Strict
371	47	Female	Undergraduate	Married	1	＞15	Outpatient and other	Senior title	Very harmonious	Head nurse	>8000	generally	Strict
372	32	Male	Undergraduate	Single	0	6~10	Emergency, Intensive Care Unit and Operating Room	Primary title	Harmonious	Nurse	＜5000	Not smooth	Strict
373	36	Female	Undergraduate	Married	1	＞15	Surgical	Senior title	Harmonious	Head nurse	>8000	smoothly	Very strict
375	40	Female	Undergraduate	Married	2	＞15	Outpatient and other	Intermediate title	Harmonious	Nurse	＜5000	Not smooth	Very strict
376	33	Female	Undergraduate	Married	1	11~15	Outpatient and other	Primary title	Harmonious	Nurse	5000-8000	generally	Strict
377	23	Female	Undergraduate	Married	1	≤5	Obstetrics and Gynecology	Primary title	Very harmonious	Nurse	5000-8000	smoothly	Very strict
378	29	Female	Undergraduate	Married	0	6~10	Internal Medicine	Primary title	Harmonious	Nurse	5000-8000	smoothly	Very strict
379	41	Female	Undergraduate	Married	2	＞15	Internal Medicine	Senior title	Very harmonious	Head nurse	>8000	smoothly	Very strict
380	35	Female	Undergraduate	Married	2	11~15	Emergency, Intensive Care Unit and Operating Room	Primary title	Very harmonious	Nurse	＜5000	generally	Very strict
381	26	Female	Undergraduate	Single	0	≤5	Emergency, Intensive Care Unit and Operating Room	Primary title	Very harmonious	Nurse	5000-8000	generally	Very strict
383	41	Female	Undergraduate	Married	2	＞15	Internal Medicine	Intermediate title	Very harmonious	Head nurse	>8000	generally	Very strict
384	40	Female	Undergraduate	Married	2	＞15	Obstetrics and Gynecology	Senior title	Very harmonious	Head nurse	>8000	smoothly	Strict
385	36	Female	Undergraduate	Married	2	11~15	Surgical	Intermediate title	Very harmonious	Nurse	>8000	generally	Very strict
386	28	Female	Junior college	Single	0	6~10	Surgical	Primary title	Very harmonious	Nurse	5000-8000	smoothly	Strict
387	27	Female	Undergraduate	Single	0	≤5	Internal Medicine	Primary title	Very harmonious	Nurse	5000-8000	generally	Strict
389	40	Female	Undergraduate	Married	2	11~15	Pediatrics	Intermediate title	generally	Nurse	5000-8000	generally	Very strict
390	26	Female	Undergraduate	Single	0	≤5	Outpatient and other	Primary title	Harmonious	Nurse	5000-8000	generally	Strict
391	25	Female	Undergraduate	Single	0	≤5	Internal Medicine	Primary title	Very harmonious	Nurse	5000-8000	smoothly	Strict
392	33	Female	Undergraduate	Married	1	11~15	Outpatient and other	Intermediate title	Harmonious	Nurse	5000-8000	Not smooth	Very strict
393	33	Female	Undergraduate	Married	1	6~10	Outpatient and other	Intermediate title	Very harmonious	Nurse	＜5000	generally	Very strict
394	35	Female	Undergraduate	Married	2	11~15	Surgical	Intermediate title	Very harmonious	Nurse	5000-8000	generally	Strict
395	29	Female	Undergraduate	Married	0	6~10	Outpatient and other	Primary title	Harmonious	Nurse	＜5000	Not smooth	Strict
396	36	Female	Undergraduate	Married	2	11~15	Surgical	Intermediate title	Very harmonious	Nurse	>8000	generally	Very strict
397	41	Female	Undergraduate	Married	2	＞15	Surgical	Intermediate title	Very harmonious	Nurse	>8000	Not smooth	Strict
398	31	Female	Undergraduate	Married	2	6~10	Surgical	Primary title	Harmonious	Nurse	＜5000	smoothly	Strict
399	45	Female	Undergraduate	Married	2	＞15	Surgical	Intermediate title	Harmonious	Head nurse	5000-8000	smoothly	Strict
400	28	Female	Undergraduate	Married	0	6~10	Internal Medicine	Primary title	generally	Nurse	5000-8000	generally	Very strict
403	42	Female	Undergraduate	Married	2	＞15	Outpatient and other	Senior title	Harmonious	Head nurse	5000-8000	smoothly	Strict
404	34	Female	Undergraduate	Married	2	11~15	Internal Medicine	Intermediate title	Very harmonious	Nurse	5000-8000	Not smooth	Strict
405	39	Female	Undergraduate	Married	2	＞15	Obstetrics and Gynecology	Intermediate title	Very harmonious	Head nurse	5000-8000	smoothly	Strict
406	46	Female	Undergraduate	Married	2	＞15	Internal Medicine	Intermediate title	Very harmonious	Nurse	5000-8000	smoothly	Strict
407	31	Female	Undergraduate	Married	1	6~10	Outpatient and other	Intermediate title	Very harmonious	Nurse	5000-8000	smoothly	Very strict
408	35	Female	Undergraduate	Married	1	＞15	Emergency, Intensive Care Unit and Operating Room	Intermediate title	Very harmonious	Head nurse	>8000	Not smooth	Very strict
409	53	Female	Junior college	Married	1	＞15	Surgical	Senior title	Harmonious	Nurse	>8000	Not smooth	Strict
410	32	Female	Junior college	Married	1	6~10	Surgical	Primary title	Harmonious	Nurse	>8000	smoothly	Very strict
411	43	Female	Undergraduate	Married	1	＞15	Emergency, Intensive Care Unit and Operating Room	Senior title	Very harmonious	Head nurse	＜5000	generally	Strict
412	25	Female	Undergraduate	Single	0	≤5	Internal Medicine	Primary title	Very harmonious	Nurse	5000-8000	generally	Very strict
413	44	Female	Undergraduate	Married	1	＞15	Outpatient and other	Intermediate title	Very harmonious	Head nurse	5000-8000	Not smooth	Strict
414	55	Female	Undergraduate	Married	1	＞15	Outpatient and other	Senior title	Very harmonious	Nurse	>8000	smoothly	Strict
415	40	Female	Undergraduate	Married	2	＞15	Obstetrics and Gynecology	Intermediate title	Very harmonious	Nurse	5000-8000	generally	Strict
416	41	Female	Undergraduate	Married	1	＞15	Pediatrics	Intermediate title	Very harmonious	Nurse	5000-8000	generally	Very strict
417	33	Female	Undergraduate	Married	1	6~10	Emergency, Intensive Care Unit and Operating Room	Primary title	Very harmonious	Nurse	＜5000	generally	Very strict
418	31	Female	Undergraduate	Married	2	≤5	Internal Medicine	Primary title	Very harmonious	Nurse	>8000	Not smooth	Very strict
419	43	Female	Undergraduate	Married	2	＞15	Outpatient and other	Intermediate title	Very harmonious	Nurse	5000-8000	smoothly	Strict
420	27	Female	Undergraduate	Single	0	≤5	Surgical	Primary title	Very harmonious	Nurse	5000-8000	Not smooth	Very strict
421	38	Female	Undergraduate	Married	1	11~15	Outpatient and other	Intermediate title	Harmonious	Head nurse	5000-8000	Not smooth	Strict
422	39	Female	Undergraduate	Married	2	11~15	Internal Medicine	Intermediate title	Very harmonious	Nurse	5000-8000	smoothly	Very strict
423	41	Female	Junior college	Married	1	＞15	Obstetrics and Gynecology	Intermediate title	Harmonious	Head nurse	5000-8000	generally	Very strict
424	49	Female	Junior college	Married	1	＞15	Outpatient and other	Intermediate title	Very harmonious	Nurse	>8000	generally	Strict
425	28	Female	Undergraduate	Single	0	≤5	Surgical	Primary title	generally	Nurse	5000-8000	Not smooth	Very strict
426	33	Female	Undergraduate	Married	1	11~15	Internal Medicine	Intermediate title	generally	Nurse	>8000	generally	Very strict
427	41	Female	Undergraduate	Married	1	＞15	Emergency, Intensive Care Unit and Operating Room	Intermediate title	Very harmonious	Head nurse	5000-8000	generally	Very strict
428	23	Female	Undergraduate	Single	0	≤5	Obstetrics and Gynecology	Primary title	Harmonious	Nurse	5000-8000	smoothly	Strict
429	33	Female	Junior college	Married	1	11~15	Outpatient and other	Primary title	Harmonious	Nurse	5000-8000	generally	Strict
430	38	Female	Undergraduate	Widowed or separated	1	11~15	Emergency, Intensive Care Unit and Operating Room	Primary title	generally	Nurse	5000-8000	Not smooth	Very strict
431	44	Female	Master degree or above	Married	2	＞15	Outpatient and other	Senior title	Very harmonious	Nurse	5000-8000	smoothly	Strict
432	32	Female	Undergraduate	Married	2	11~15	Emergency, Intensive Care Unit and Operating Room	Primary title	Harmonious	Nurse	＜5000	generally	Strict
434	32	Female	Undergraduate	Married	1	6~10	Emergency, Intensive Care Unit and Operating Room	Primary title	Harmonious	Nurse	5000-8000	generally	Strict
435	24	Female	Undergraduate	Single	0	≤5	Emergency, Intensive Care Unit and Operating Room	Primary title	Harmonious	Nurse	5000-8000	generally	Very strict
437	34	Female	Undergraduate	Married	1	11~15	Internal Medicine	Intermediate title	Harmonious	Nurse	5000-8000	Not smooth	Strict
438	39	Female	Undergraduate	Married	1	＞15	Outpatient and other	Intermediate title	Very harmonious	Nurse	5000-8000	smoothly	Very strict
440	33	Female	Undergraduate	Married	2	6~10	Emergency, Intensive Care Unit and Operating Room	Primary title	generally	Nurse	5000-8000	Not smooth	Very strict
441	35	Female	Junior college	Married	2	11~15	Emergency, Intensive Care Unit and Operating Room	Primary title	Very harmonious	Nurse	＜5000	generally	Strict
442	40	Female	Undergraduate	Married	2	＞15	Outpatient and other	Intermediate title	Harmonious	Nurse	＜5000	Not smooth	Strict
443	26	Female	Undergraduate	Single	0	≤5	Internal Medicine	Primary title	Harmonious	Nurse	>8000	smoothly	Strict
444	30	Female	Undergraduate	Single	0	6~10	Surgical	Intermediate title	Very harmonious	Nurse	>8000	generally	Very strict
445	26	Female	Undergraduate	Single	0	≤5	Surgical	Primary title	Harmonious	Nurse	＜5000	smoothly	generally
446	37	Female	Undergraduate	Married	2	＞15	Internal Medicine	Intermediate title	Harmonious	Nurse	>8000	smoothly	Very strict
448	43	Female	Undergraduate	Married	2	＞15	Internal Medicine	Senior title	Harmonious	Head nurse	5000-8000	smoothly	Strict
449	40	Female	Undergraduate	Married	2	＞15	Surgical	Intermediate title	Very harmonious	Nurse	5000-8000	generally	Strict
451	28	Female	Undergraduate	Married	1	≤5	Internal Medicine	Primary title	Very harmonious	Nurse	5000-8000	generally	Very strict
452	34	Female	Undergraduate	Married	1	11~15	Emergency, Intensive Care Unit and Operating Room	Primary title	Very harmonious	Nurse	5000-8000	generally	Very strict
453	28	Female	Undergraduate	Married	1	≤5	Outpatient and other	Primary title	Very harmonious	Nurse	＜5000	smoothly	Very strict
454	37	Female	Undergraduate	Married	2	11~15	Obstetrics and Gynecology	Intermediate title	Very harmonious	Nurse	>8000	Not smooth	Very strict
455	41	Female	Undergraduate	Married	1	＞15	Surgical	Intermediate title	Harmonious	Nurse	5000-8000	generally	Very strict
456	38	Female	Undergraduate	Single	0	＞15	Outpatient and other	Primary title	Very harmonious	Nurse	＜5000	generally	Very strict
457	37	Female	Undergraduate	Married	1	11~15	Internal Medicine	Primary title	Very harmonious	Nurse	5000-8000	Not smooth	Very strict
458	36	Female	Undergraduate	Married	2	11~15	Internal Medicine	Intermediate title	Very harmonious	Nurse	5000-8000	generally	Very strict
459	28	Female	Undergraduate	Single	0	≤5	Surgical	Primary title	Harmonious	Nurse	5000-8000	generally	Very strict
460	30	Female	Undergraduate	Single	0	6~10	Outpatient and other	Primary title	Very harmonious	Nurse	＜5000	generally	Very strict
461	39	Female	Undergraduate	Married	2	＞15	Surgical	Intermediate title	Harmonious	Nurse	5000-8000	generally	Very strict
462	35	Male	Undergraduate	Married	1	6~10	Internal Medicine	Intermediate title	Very harmonious	Nurse	5000-8000	Not smooth	Very strict
463	36	Female	Undergraduate	Married	0	＞15	Emergency, Intensive Care Unit and Operating Room	Primary title	Very harmonious	Nurse	＜5000	generally	Very strict
464	31	Female	Junior college	Married	2	6~10	Emergency, Intensive Care Unit and Operating Room	Primary title	Very harmonious	Nurse	＜5000	generally	Very strict
465	35	Female	Undergraduate	Married	2	11~15	Internal Medicine	Intermediate title	Very harmonious	Nurse	5000-8000	generally	Very strict
466	28	Female	Undergraduate	Married	1	6~10	Emergency, Intensive Care Unit and Operating Room	Primary title	Very harmonious	Nurse	5000-8000	generally	Very strict
467	27	Female	Undergraduate	Single	0	≤5	Outpatient and other	Primary title	Harmonious	Nurse	5000-8000	generally	Strict
468	36	Female	Undergraduate	Married	1	＞15	Internal Medicine	Intermediate title	Harmonious	Nurse	>8000	Not smooth	Strict
469	29	Female	Undergraduate	Married	2	6~10	Outpatient and other	Primary title	Very harmonious	Nurse	5000-8000	smoothly	Very strict
470	36	Female	Undergraduate	Married	2	11~15	Internal Medicine	Intermediate title	Very harmonious	Nurse	5000-8000	generally	Very strict
471	36	Female	Undergraduate	Married	2	11~15	Outpatient and other	Intermediate title	Harmonious	Nurse	5000-8000	smoothly	Strict
473	28	Female	Undergraduate	Single	0	≤5	Internal Medicine	Primary title	Very harmonious	Nurse	5000-8000	generally	Very strict
474	40	Female	Undergraduate	Married	2	11~15	Surgical	Intermediate title	Harmonious	Nurse	5000-8000	Not smooth	Strict
475	34	Female	Undergraduate	Married	1	11~15	Internal Medicine	Intermediate title	Harmonious	Nurse	5000-8000	Not smooth	Strict
477	37	Female	Undergraduate	Married	2	11~15	Emergency, Intensive Care Unit and Operating Room	Intermediate title	Very harmonious	Nurse	5000-8000	Not smooth	Very strict
478	35	Female	Undergraduate	Married	1	11~15	Outpatient and other	Primary title	Very harmonious	Nurse	＜5000	generally	Very strict
479	24	Female	Undergraduate	Single	0	≤5	Surgical	Primary title	Harmonious	Nurse	5000-8000	generally	Strict
480	40	Female	Junior college	Married	1	＞15	Outpatient and other	Intermediate title	Harmonious	Nurse	5000-8000	Not smooth	Strict
481	26	Female	Undergraduate	Single	0	≤5	Outpatient and other	Primary title	Very harmonious	Nurse	5000-8000	smoothly	Very strict
483	27	Female	Undergraduate	Single	0	≤5	Internal Medicine	Primary title	Very harmonious	Nurse	5000-8000	generally	Strict
485	35	Female	Undergraduate	Married	2	11~15	Surgical	Primary title	Very harmonious	Nurse	＜5000	generally	Strict
486	27	Female	Undergraduate	Single	0	≤5	Surgical	Primary title	Harmonious	Nurse	5000-8000	generally	Strict
487	33	Female	Undergraduate	Married	1	11~15	Surgical	Intermediate title	Very harmonious	Nurse	5000-8000	generally	Strict
488	24	Female	Undergraduate	Single	0	≤5	Outpatient and other	Primary title	Very harmonious	Nurse	＜5000	generally	Very strict
489	35	Male	Undergraduate	Married	>2个	11~15	Emergency, Intensive Care Unit and Operating Room	Intermediate title	generally	Nurse	5000-8000	Not smooth	generally
490	34	Female	Undergraduate	Married	1	11~15	Outpatient and other	Intermediate title	Very harmonious	Nurse	5000-8000	smoothly	Very strict
491	38	Female	Undergraduate	Married	2	11~15	Internal Medicine	Intermediate title	Very harmonious	Nurse	5000-8000	smoothly	Strict
492	32	Female	Undergraduate	Married	0	6~10	Emergency, Intensive Care Unit and Operating Room	Primary title	Harmonious	Nurse	5000-8000	generally	Very strict
493	32	Female	Undergraduate	Married	1	6~10	Internal Medicine	Intermediate title	Harmonious	Nurse	5000-8000	generally	Very strict
494	35	Female	Undergraduate	Married	2	11~15	Obstetrics and Gynecology	Intermediate title	Very harmonious	Nurse	5000-8000	smoothly	Very strict
495	26	Female	Undergraduate	Single	0	≤5	Internal Medicine	Primary title	Harmonious	Nurse	5000-8000	smoothly	Very strict
496	34	Female	Undergraduate	Married	2	11~15	Outpatient and other	Primary title	Very harmonious	Nurse	＜5000	Not smooth	Very strict
497	27	Female	Undergraduate	Single	0	≤5	Obstetrics and Gynecology	Primary title	Very harmonious	Nurse	5000-8000	generally	Very strict
498	32	Female	Undergraduate	Married	1	6~10	Internal Medicine	Primary title	Very harmonious	Nurse	5000-8000	Not smooth	Very strict
500	31	Female	Undergraduate	Single	0	6~10	Internal Medicine	Primary title	Very harmonious	Nurse	5000-8000	smoothly	Very strict
501	36	Female	Master degree or above	Married	2	11~15	Outpatient and other	Intermediate title	Very harmonious	Nurse	>8000	Not smooth	Strict
502	26	Female	Undergraduate	Single	0	≤5	Internal Medicine	Primary title	generally	Nurse	5000-8000	generally	Very strict
503	27	Female	Undergraduate	Single	0	≤5	Outpatient and other	Primary title	Harmonious	Nurse	＜5000	generally	generally
504	43	Female	Undergraduate	Married	2	＞15	Outpatient and other	Intermediate title	Harmonious	Nurse	5000-8000	smoothly	Very strict
505	29	Female	Undergraduate	Married	1	6~10	Surgical	Primary title	Very harmonious	Nurse	5000-8000	generally	Strict
506	26	Female	Junior college	Single	0	≤5	Obstetrics and Gynecology	Primary title	Very harmonious	Nurse	5000-8000	generally	Very strict
507	32	Female	Undergraduate	Married	2	6~10	Outpatient and other	Intermediate title	generally	Nurse	5000-8000	generally	generally
508	32	Female	Undergraduate	Married	2	11~15	Surgical	Primary title	Very harmonious	Nurse	5000-8000	Not smooth	Very strict
509	38	Female	Undergraduate	Married	1	11~15	Outpatient and other	Intermediate title	Disharmonious	Head nurse	>8000	generally	generally
510	30	Female	Undergraduate	Married	2	6~10	Surgical	Primary title	Very harmonious	Nurse	5000-8000	smoothly	Very strict
511	41	Female	Undergraduate	Married	1	＞15	Outpatient and other	Intermediate title	Harmonious	Nurse	5000-8000	generally	Strict
512	37	Female	Undergraduate	Married	1	11~15	Internal Medicine	Intermediate title	Very harmonious	Nurse	＜5000	Not smooth	Very strict
513	35	Female	Undergraduate	Married	2	11~15	Internal Medicine	Intermediate title	Very harmonious	Nurse	5000-8000	generally	Very strict
514	33	Female	Undergraduate	Married	2	11~15	Internal Medicine	Intermediate title	generally	Nurse	5000-8000	generally	Strict
515	40	Female	Undergraduate	Married	2	11~15	Outpatient and other	Intermediate title	Harmonious	Nurse	5000-8000	generally	Very strict
516	33	Female	Undergraduate	Single	0	11~15	Emergency, Intensive Care Unit and Operating Room	Intermediate title	Harmonious	Nurse	5000-8000	generally	Strict
517	38	Female	Undergraduate	Married	1	＞15	Outpatient and other	Intermediate title	Harmonious	Nurse	>8000	Not smooth	Strict
518	25	Female	Undergraduate	Single	0	≤5	Outpatient and other	Primary title	Very harmonious	Nurse	5000-8000	generally	Very strict
519	34	Male	Undergraduate	Single	0	6~10	Outpatient and other	Primary title	Harmonious	Nurse	＜5000	generally	Very strict
521	33	Female	Undergraduate	Married	1	11~15	Obstetrics and Gynecology	Intermediate title	Harmonious	Nurse	>8000	Not smooth	Strict
522	36	Female	Undergraduate	Married	2	＞15	Surgical	Intermediate title	Very harmonious	Nurse	5000-8000	smoothly	Very strict
523	40	Female	Undergraduate	Married	1	＞15	Outpatient and other	Intermediate title	Harmonious	Nurse	＜5000	generally	Very strict
524	45	Female	Undergraduate	Married	1	＞15	Outpatient and other	Primary title	Very harmonious	Nurse	＜5000	generally	Very strict
525	35	Female	Undergraduate	Married	2	11~15	Internal Medicine	Primary title	Very harmonious	Nurse	5000-8000	Not smooth	Strict
526	34	Female	Undergraduate	Married	2	11~15	Internal Medicine	Intermediate title	Very harmonious	Nurse	5000-8000	Not smooth	Very strict
527	28	Female	Undergraduate	Married	0	≤5	Outpatient and other	Primary title	Harmonious	Nurse	5000-8000	smoothly	Strict
528	33	Female	Undergraduate	Married	2	11~15	Internal Medicine	Intermediate title	Very harmonious	Nurse	5000-8000	generally	Very strict
529	27	Female	Undergraduate	Single	0	≤5	Internal Medicine	Primary title	Harmonious	Nurse	＜5000	generally	Strict
530	29	Female	Undergraduate	Married	1	6~10	Obstetrics and Gynecology	Primary title	generally	Nurse	5000-8000	generally	Strict
531	36	Female	Undergraduate	Married	2	11~15	Internal Medicine	Primary title	Very harmonious	Nurse	＜5000	Not smooth	Very strict
532	36	Female	Undergraduate	Married	2	11~15	Internal Medicine	Intermediate title	Harmonious	Head nurse	5000-8000	generally	Strict
533	28	Female	Undergraduate	Married	0	≤5	Obstetrics and Gynecology	Primary title	generally	Nurse	5000-8000	generally	Strict
534	33	Female	Undergraduate	Married	1	11~15	Internal Medicine	Intermediate title	Very harmonious	Nurse	5000-8000	Not smooth	Very strict
535	29	Female	Junior college	Married	1	6~10	Internal Medicine	Primary title	Harmonious	Nurse	＜5000	smoothly	Very strict
536	36	Female	Undergraduate	Married	1	11~15	Surgical	Intermediate title	Very harmonious	Nurse	>8000	Not smooth	Very strict
537	34	Female	Undergraduate	Single	0	11~15	Outpatient and other	Intermediate title	Harmonious	Nurse	＜5000	generally	Strict
538	30	Female	Undergraduate	Single	0	6~10	Internal Medicine	Primary title	Very harmonious	Nurse	5000-8000	smoothly	Very strict
539	28	Female	Undergraduate	Married	0	≤5	Outpatient and other	Primary title	Harmonious	Nurse	5000-8000	generally	Strict
541	38	Female	Undergraduate	Married	1	11~15	Internal Medicine	Intermediate title	Very harmonious	Nurse	5000-8000	generally	Very strict
542	36	Female	Undergraduate	Married	1	11~15	Emergency, Intensive Care Unit and Operating Room	Intermediate title	Very harmonious	Nurse	5000-8000	Not smooth	Very strict
543	35	Male	Undergraduate	Married	1	11~15	Emergency, Intensive Care Unit and Operating Room	Primary title	Harmonious	Nurse	＜5000	generally	Very strict
545	26	Female	Undergraduate	Married	1	≤5	Emergency, Intensive Care Unit and Operating Room	Primary title	Harmonious	Nurse	>8000	generally	Very strict
546	37	Female	Junior college	Married	1	11~15	Internal Medicine	Primary title	Very harmonious	Nurse	5000-8000	smoothly	Very strict
547	35	Female	Undergraduate	Married	1	＞15	Internal Medicine	Intermediate title	Harmonious	Nurse	＜5000	smoothly	Very strict
548	44	Female	Undergraduate	Married	2	＞15	Outpatient and other	Intermediate title	Harmonious	Nurse	5000-8000	Not smooth	generally
549	36	Female	Undergraduate	Married	2	＞15	Internal Medicine	Intermediate title	generally	Nurse	5000-8000	generally	Very strict
550	36	Female	Undergraduate	Married	1	11~15	Emergency, Intensive Care Unit and Operating Room	Primary title	generally	Nurse	5000-8000	Not smooth	Strict
551	32	Female	Undergraduate	Married	2	6~10	Internal Medicine	Intermediate title	Very harmonious	Nurse	5000-8000	smoothly	Very strict
553	37	Female	Undergraduate	Married	2	＞15	Surgical	Intermediate title	Harmonious	Nurse	5000-8000	smoothly	Very strict
554	30	Female	Undergraduate	Single	0	6~10	Outpatient and other	Primary title	Harmonious	Nurse	5000-8000	generally	Strict
555	42	Female	Junior college	Married	1	＞15	Outpatient and other	Intermediate title	Very harmonious	Nurse	5000-8000	generally	generally
557	31	Female	Undergraduate	Single	0	6~10	Outpatient and other	Intermediate title	Harmonious	Nurse	＜5000	generally	Strict
558	32	Female	Undergraduate	Married	2	11~15	Internal Medicine	Intermediate title	Harmonious	Nurse	5000-8000	smoothly	Strict
559	36	Female	Undergraduate	Married	>2个	11~15	Pediatrics	Primary title	Harmonious	Nurse	5000-8000	Not smooth	Very strict
560	31	Female	Undergraduate	Married	2	6~10	Internal Medicine	Intermediate title	Harmonious	Nurse	5000-8000	Not smooth	Very strict
561	41	Female	Undergraduate	Married	2	＞15	Internal Medicine	Senior title	Very harmonious	Head nurse	5000-8000	smoothly	generally
562	26	Female	Undergraduate	Single	0	≤5	Internal Medicine	Primary title	Harmonious	Nurse	＜5000	generally	Very strict
563	23	Female	Junior college	Single	0	≤5	Internal Medicine	Primary title	Harmonious	Nurse	＜5000	smoothly	Very strict
564	36	Female	Undergraduate	Married	2	＞15	Internal Medicine	Intermediate title	generally	Nurse	＜5000	generally	Strict
565	32	Female	Undergraduate	Single	0	6~10	Obstetrics and Gynecology	Intermediate title	Very harmonious	Nurse	5000-8000	smoothly	Very strict
566	36	Female	Undergraduate	Married	2	11~15	Internal Medicine	Intermediate title	Very harmonious	Nurse	5000-8000	smoothly	Strict
567	26	Female	Undergraduate	Single	0	≤5	Outpatient and other	Primary title	Harmonious	Nurse	5000-8000	smoothly	Strict
568	43	Female	Undergraduate	Married	1	＞15	Outpatient and other	Intermediate title	Harmonious	Nurse	5000-8000	generally	generally
569	25	Female	Undergraduate	Married	0	≤5	Internal Medicine	Primary title	Harmonious	Nurse	＜5000	smoothly	Strict
570	36	Female	Undergraduate	Married	2	11~15	Surgical	Primary title	Harmonious	Nurse	5000-8000	generally	Strict
571	30	Female	Undergraduate	Single	0	11~15	Outpatient and other	Intermediate title	Harmonious	Nurse	5000-8000	smoothly	Strict
572	25	Female	Undergraduate	Single	0	≤5	Outpatient and other	Primary title	Harmonious	Nurse	＜5000	smoothly	Very strict
573	33	Female	Undergraduate	Married	1	11~15	Surgical	Intermediate title	Harmonious	Nurse	5000-8000	smoothly	Very strict
575	43	Female	Junior college	Married	2	＞15	Obstetrics and Gynecology	Primary title	Very harmonious	Nurse	＜5000	generally	Very strict
576	26	Female	Undergraduate	Single	0	≤5	Obstetrics and Gynecology	Primary title	Harmonious	Nurse	>8000	smoothly	Very strict
577	42	Female	Undergraduate	Married	1	11~15	Outpatient and other	Primary title	Harmonious	Nurse	>8000	smoothly	Very strict
578	28	Female	Undergraduate	Married	1	6~10	Internal Medicine	Intermediate title	Harmonious	Nurse	5000-8000	smoothly	Very strict
579	36	Female	Undergraduate	Married	1	＞15	Obstetrics and Gynecology	Intermediate title	Very harmonious	Nurse	>8000	Not smooth	Very strict
580	39	Female	Undergraduate	Married	1	11~15	Outpatient and other	Intermediate title	Harmonious	Nurse	5000-8000	Not smooth	Strict
581	37	Female	Undergraduate	Married	2	11~15	Internal Medicine	Intermediate title	Harmonious	Nurse	5000-8000	Not smooth	Very strict
582	39	Female	Undergraduate	Married	2	＞15	Internal Medicine	Intermediate title	Harmonious	Nurse	5000-8000	smoothly	Very strict
583	38	Female	Undergraduate	Married	2	11~15	Emergency, Intensive Care Unit and Operating Room	Intermediate title	Very harmonious	Nurse	＜5000	smoothly	Very strict
584	39	Female	Undergraduate	Married	2	＞15	Internal Medicine	Intermediate title	Harmonious	Nurse	5000-8000	smoothly	Very strict
585	26	Female	Undergraduate	Single	0	≤5	Outpatient and other	Primary title	generally	Nurse	5000-8000	generally	Strict
586	26	Female	Undergraduate	Married	0	≤5	Internal Medicine	Primary title	Harmonious	Nurse	5000-8000	generally	Very strict
587	35	Female	Undergraduate	Married	2	11~15	Pediatrics	Primary title	Very harmonious	Nurse	5000-8000	smoothly	Very strict
588	25	Female	Undergraduate	Single	0	≤5	Surgical	Primary title	generally	Nurse	5000-8000	generally	Strict
590	30	Female	Undergraduate	Married	2	6~10	Emergency, Intensive Care Unit and Operating Room	Primary title	Very harmonious	Nurse	>8000	smoothly	Strict
591	32	Male	Undergraduate	Married	1	6~10	Emergency, Intensive Care Unit and Operating Room	Primary title	Harmonious	Nurse	＜5000	generally	Strict
592	28	Female	Undergraduate	Single	0	≤5	Internal Medicine	Primary title	Harmonious	Nurse	5000-8000	smoothly	Very strict
593	36	Female	Undergraduate	Married	2	11~15	Internal Medicine	Intermediate title	Very harmonious	Nurse	5000-8000	Not smooth	Very strict
594	27	Female	Undergraduate	Single	0	≤5	Internal Medicine	Primary title	Harmonious	Nurse	＜5000	generally	Very strict
595	27	Female	Undergraduate	Single	0	≤5	Internal Medicine	Primary title	Harmonious	Nurse	5000-8000	smoothly	Strict
596	35	Female	Undergraduate	Married	2	11~15	Internal Medicine	Intermediate title	Very harmonious	Nurse	5000-8000	smoothly	Strict
597	59	Female	Undergraduate	Married	1	＞15	Internal Medicine	Senior title	Harmonious	Nurse	>8000	smoothly	Very strict
598	30	Female	Junior college	Married	0	11~15	Outpatient and other	Primary title	Very harmonious	Nurse	＜5000	generally	Very strict
599	33	Female	Undergraduate	Married	2	11~15	Surgical	Intermediate title	Very harmonious	Nurse	5000-8000	smoothly	Very strict
600	32	Female	Undergraduate	Married	2	6~10	Internal Medicine	Primary title	Very harmonious	Nurse	＜5000	Not smooth	Very strict
602	51	Female	Junior college	Married	1	＞15	Internal Medicine	Senior title	Very harmonious	Nurse	5000-8000	Not smooth	Very strict
603	36	Female	Undergraduate	Married	1	11~15	Surgical	Intermediate title	generally	Nurse	>8000	smoothly	Very strict
605	31	Female	Undergraduate	Married	1	6~10	Internal Medicine	Intermediate title	Very harmonious	Nurse	5000-8000	generally	Very strict
606	45	Female	Undergraduate	Married	2	＞15	Internal Medicine	Primary title	Very harmonious	Nurse	5000-8000	generally	Very strict
607	33	Female	Undergraduate	Married	1	11~15	Internal Medicine	Primary title	Harmonious	Nurse	5000-8000	Not smooth	Very strict
608	29	Female	Undergraduate	Married	1	6~10	Internal Medicine	Primary title	Harmonious	Nurse	5000-8000	Not smooth	Strict
609	27	Female	Junior college	Married	1	≤5	Internal Medicine	Primary title	generally	Nurse	5000-8000	Not smooth	Very strict
610	32	Female	Undergraduate	Married	1	6~10	Internal Medicine	Primary title	Harmonious	Nurse	＜5000	generally	Very strict
611	35	Female	Undergraduate	Married	1	11~15	Pediatrics	Intermediate title	Very harmonious	Nurse	5000-8000	generally	Strict
612	36	Female	Undergraduate	Married	2	11~15	Internal Medicine	Intermediate title	Very harmonious	Nurse	＜5000	smoothly	Very strict
613	40	Female	Undergraduate	Married	1	＞15	Surgical	Intermediate title	Very harmonious	Head nurse	＜5000	smoothly	Strict
614	37	Female	Undergraduate	Married	2	11~15	Internal Medicine	Primary title	Harmonious	Nurse	＜5000	smoothly	Very strict
615	39	Female	Undergraduate	Married	1	＞15	Obstetrics and Gynecology	Intermediate title	Very harmonious	Nurse	>8000	smoothly	Very strict
616	40	Female	Undergraduate	Married	2	＞15	Internal Medicine	Intermediate title	generally	Nurse	5000-8000	Not smooth	Very strict
617	30	Female	Junior college	Married	0	6~10	Surgical	Primary title	Very harmonious	Nurse	＜5000	generally	Very strict
618	34	Female	Undergraduate	Married	2	11~15	Internal Medicine	Intermediate title	Harmonious	Nurse	5000-8000	generally	Very strict
619	34	Female	Undergraduate	Married	1	11~15	Outpatient and other	Intermediate title	Harmonious	Nurse	＜5000	Not smooth	Strict
620	40	Female	Undergraduate	Married	1	＞15	Surgical	Senior title	Very harmonious	Head nurse	>8000	smoothly	Very strict
621	29	Female	Undergraduate	Married	0	≤5	Internal Medicine	Primary title	generally	Nurse	5000-8000	Not smooth	Very strict
622	34	Female	Undergraduate	Married	1	11~15	Outpatient and other	Intermediate title	Very harmonious	Nurse	5000-8000	Not smooth	Strict
623	36	Female	Undergraduate	Married	2	11~15	Outpatient and other	Intermediate title	Very harmonious	Nurse	＜5000	generally	Very strict
625	37	Female	Undergraduate	Married	2	11~15	Internal Medicine	Intermediate title	Very harmonious	Nurse	5000-8000	Not smooth	Very strict
627	38	Female	Undergraduate	Married	2	11~15	Internal Medicine	Intermediate title	Harmonious	Nurse	5000-8000	Not smooth	Very strict
628	45	Female	Undergraduate	Married	1	＞15	Outpatient and other	Intermediate title	Harmonious	Nurse	5000-8000	Not smooth	Strict
629	37	Female	Junior college	Married	1	11~15	Internal Medicine	Intermediate title	Harmonious	Nurse	＜5000	generally	Strict
630	26	Female	Undergraduate	Single	0	≤5	Emergency, Intensive Care Unit and Operating Room	Primary title	Harmonious	Nurse	5000-8000	generally	Very strict
631	37	Female	Undergraduate	Married	2	＞15	Outpatient and other	Primary title	Harmonious	Nurse	5000-8000	Not smooth	Very strict
632	39	Female	Undergraduate	Married	>2个	11~15	Internal Medicine	Intermediate title	Harmonious	Nurse	5000-8000	generally	Strict
633	28	Male	Undergraduate	Single	0	≤5	Emergency, Intensive Care Unit and Operating Room	Primary title	Very harmonious	Nurse	＜5000	smoothly	Very strict
634	31	Female	Undergraduate	Married	1	6~10	Surgical	Primary title	Harmonious	Nurse	5000-8000	generally	Strict
635	36	Female	Undergraduate	Married	2	11~15	Emergency, Intensive Care Unit and Operating Room	Primary title	Harmonious	Nurse	5000-8000	Not smooth	Strict
637	45	Female	Undergraduate	Married	2	＞15	Outpatient and other	Intermediate title	Harmonious	Nurse	＜5000	generally	Strict
638	26	Female	Undergraduate	Single	0	≤5	Internal Medicine	Primary title	Harmonious	Nurse	5000-8000	generally	Strict
639	23	Female	Junior college	Single	0	≤5	Obstetrics and Gynecology	Primary title	Very harmonious	Nurse	>8000	smoothly	Strict
640	26	Female	Undergraduate	Single	0	≤5	Emergency, Intensive Care Unit and Operating Room	Primary title	Harmonious	Nurse	＜5000	generally	Strict
641	30	Female	Undergraduate	Married	0	6~10	Surgical	Primary title	Very harmonious	Nurse	5000-8000	smoothly	Strict
642	32	Female	Undergraduate	Married	1	11~15	Outpatient and other	Primary title	Harmonious	Nurse	5000-8000	smoothly	generally
643	28	Female	Undergraduate	Married	1	6~10	Internal Medicine	Primary title	Harmonious	Nurse	5000-8000	Not smooth	Strict
644	24	Female	Undergraduate	Single	0	≤5	Surgical	Primary title	Harmonious	Nurse	5000-8000	smoothly	Very strict
645	26	Female	Undergraduate	Married	0	≤5	Obstetrics and Gynecology	Primary title	Harmonious	Nurse	5000-8000	generally	Very strict
646	37	Female	Undergraduate	Married	2	＞15	Internal Medicine	Primary title	Very harmonious	Nurse	5000-8000	generally	Very strict
647	27	Female	Undergraduate	Married	1	≤5	Internal Medicine	Primary title	Very harmonious	Nurse	＜5000	generally	Very strict
648	52	Female	Junior college	Married	1	＞15	Outpatient and other	Intermediate title	Very harmonious	Head nurse	5000-8000	generally	Strict
649	41	Male	Undergraduate	Married	2	＞15	Outpatient and other	Intermediate title	Very harmonious	Head nurse	5000-8000	smoothly	Very strict
650	26	Female	Undergraduate	Single	0	≤5	Emergency, Intensive Care Unit and Operating Room	Primary title	Very harmonious	Nurse	5000-8000	Not smooth	Very strict
651	38	Female	Undergraduate	Married	2	＞15	Emergency, Intensive Care Unit and Operating Room	Intermediate title	Harmonious	Nurse	5000-8000	Not smooth	Very strict
652	34	Female	Undergraduate	Married	2	11~15	Outpatient and other	Intermediate title	Very harmonious	Nurse	5000-8000	smoothly	Very strict
653	23	Female	Undergraduate	Single	0	≤5	Obstetrics and Gynecology	Primary title	Very harmonious	Nurse	＜5000	generally	Very strict
655	38	Female	Undergraduate	Married	1	11~15	Outpatient and other	Intermediate title	Very harmonious	Nurse	5000-8000	generally	Strict
656	42	Female	Undergraduate	Married	2	＞15	Outpatient and other	Intermediate title	Very harmonious	Nurse	5000-8000	Not smooth	Very strict
657	31	Female	Undergraduate	Married	1	6~10	Surgical	Primary title	Very harmonious	Nurse	＜5000	smoothly	Strict
659	37	Female	Undergraduate	Married	2	＞15	Internal Medicine	Intermediate title	Harmonious	Nurse	>8000	generally	Very strict
661	36	Female	Undergraduate	Married	2	11~15	Internal Medicine	Intermediate title	generally	Nurse	>8000	generally	generally
662	37	Female	Undergraduate	Married	2	＞15	Outpatient and other	Intermediate title	Harmonious	Head nurse	>8000	generally	Very strict
663	37	Female	Junior college	Widowed or separated	1	＞15	Outpatient and other	Primary title	Very harmonious	Nurse	＜5000	smoothly	Strict
664	40	Female	Undergraduate	Married	1	＞15	Emergency, Intensive Care Unit and Operating Room	Senior title	Very harmonious	Nurse	5000-8000	smoothly	Very strict
666	33	Female	Undergraduate	Married	2	11~15	Outpatient and other	Primary title	Very harmonious	Nurse	＜5000	Not smooth	Very strict
667	33	Female	Undergraduate	Married	2	11~15	Internal Medicine	Intermediate title	Harmonious	Nurse	5000-8000	Not smooth	Strict
668	27	Female	Undergraduate	Single	0	≤5	Internal Medicine	Primary title	Very harmonious	Nurse	>8000	generally	Strict
669	36	Female	Undergraduate	Married	1	＞15	Outpatient and other	Intermediate title	Very harmonious	Nurse	5000-8000	smoothly	Very strict
670	37	Female	Undergraduate	Married	2	11~15	Outpatient and other	Intermediate title	Very harmonious	Nurse	5000-8000	smoothly	Strict
671	30	Male	Undergraduate	Married	0	≤5	Outpatient and other	Primary title	Harmonious	Nurse	＜5000	generally	Strict
672	33	Female	Undergraduate	Married	2	11~15	Emergency, Intensive Care Unit and Operating Room	Primary title	generally	Nurse	5000-8000	Not smooth	Very strict
673	36	Female	Undergraduate	Married	>2个	11~15	Emergency, Intensive Care Unit and Operating Room	Intermediate title	Very harmonious	Head nurse	＜5000	smoothly	Strict
674	36	Female	Junior college	Single	2	11~15	Outpatient and other	Intermediate title	Very harmonious	Nurse	＜5000	generally	Very strict
675	39	Female	Undergraduate	Married	2	＞15	Emergency, Intensive Care Unit and Operating Room	Intermediate title	Very harmonious	Nurse	＜5000	smoothly	Strict
676	30	Female	Undergraduate	Married	1	6~10	Emergency, Intensive Care Unit and Operating Room	Primary title	Harmonious	Nurse	>8000	generally	Very strict
677	29	Female	Undergraduate	Married	2	6~10	Emergency, Intensive Care Unit and Operating Room	Intermediate title	Very harmonious	Nurse	5000-8000	smoothly	Very strict
678	23	Male	Junior college	Single	0	≤5	Emergency, Intensive Care Unit and Operating Room	Primary title	Harmonious	Nurse	＜5000	generally	Very strict
679	28	Female	Undergraduate	Single	0	6~10	Emergency, Intensive Care Unit and Operating Room	Primary title	Harmonious	Nurse	5000-8000	smoothly	Very strict
681	36	Female	Undergraduate	Married	1	11~15	Emergency, Intensive Care Unit and Operating Room	Intermediate title	Harmonious	Nurse	5000-8000	generally	Strict
682	28	Female	Undergraduate	Single	0	6~10	Outpatient and other	Primary title	Harmonious	Nurse	>8000	Not smooth	Strict
683	35	Female	Undergraduate	Married	2	＞15	Pediatrics	Intermediate title	Very harmonious	Nurse	>8000	generally	Strict
684	30	Female	Undergraduate	Single	0	11~15	Pediatrics	Primary title	generally	Nurse	＜5000	Not smooth	Strict
685	38	Female	Undergraduate	Married	2	11~15	Pediatrics	Intermediate title	generally	Nurse	5000-8000	generally	Very strict
686	28	Female	Undergraduate	Single	0	≤5	Surgical	Primary title	Very harmonious	Nurse	＜5000	smoothly	Very strict
687	32	Female	Undergraduate	Married	1	11~15	Internal Medicine	Primary title	Harmonious	Nurse	5000-8000	generally	Very strict
688	33	Female	Undergraduate	Married	2	6~10	Internal Medicine	Intermediate title	Harmonious	Nurse	>8000	smoothly	Strict
689	33	Female	Undergraduate	Married	0	6~10	Internal Medicine	Primary title	Very harmonious	Nurse	5000-8000	generally	Very strict
690	29	Female	Undergraduate	Married	0	6~10	Surgical	Primary title	Very harmonious	Nurse	5000-8000	Not smooth	Very strict
691	40	Female	Undergraduate	Married	1	＞15	Outpatient and other	Senior title	Very harmonious	Nurse	5000-8000	smoothly	Very strict
692	39	Female	Undergraduate	Married	2	＞15	Emergency, Intensive Care Unit and Operating Room	Intermediate title	Very harmonious	Head nurse	5000-8000	smoothly	Strict
693	39	Female	Undergraduate	Married	2	＞15	Internal Medicine	Senior title	Harmonious	Head nurse	5000-8000	smoothly	Strict
694	39	Female	Undergraduate	Married	2	＞15	Surgical	Intermediate title	Very harmonious	Nurse	>8000	smoothly	Strict
695	40	Female	Undergraduate	Married	2	＞15	Internal Medicine	Intermediate title	Very harmonious	Head nurse	>8000	generally	Very strict
696	29	Female	Undergraduate	Married	0	6~10	Emergency, Intensive Care Unit and Operating Room	Primary title	Harmonious	Nurse	>8000	generally	Very strict
697	44	Female	Undergraduate	Married	1	＞15	Surgical	Intermediate title	Very harmonious	Nurse	5000-8000	Not smooth	Strict
698	41	Female	Undergraduate	Married	2	＞15	Internal Medicine	Intermediate title	Very harmonious	Nurse	>8000	generally	Very strict
699	31	Female	Undergraduate	Single	0	11~15	Internal Medicine	Intermediate title	Harmonious	Nurse	＜5000	generally	Strict
700	38	Female	Undergraduate	Married	2	＞15	Pediatrics	Intermediate title	Harmonious	Head nurse	>8000	Not smooth	Very strict
701	33	Female	Undergraduate	Married	1	11~15	Surgical	Intermediate title	Harmonious	Nurse	5000-8000	smoothly	Strict
702	33	Female	Undergraduate	Married	1	6~10	Outpatient and other	Primary title	Very harmonious	Nurse	5000-8000	generally	Very strict
703	42	Female	Undergraduate	Married	1	＞15	Emergency, Intensive Care Unit and Operating Room	Intermediate title	generally	Nurse	5000-8000	Not smooth	Strict
704	40	Female	Undergraduate	Married	1	＞15	Surgical	Intermediate title	Very harmonious	Nurse	5000-8000	generally	Very strict
705	35	Female	Undergraduate	Married	1	11~15	Internal Medicine	Intermediate title	Very harmonious	Nurse	>8000	generally	Very strict
706	53	Female	Undergraduate	Married	1	＞15	Outpatient and other	Senior title	Very harmonious	Head nurse	5000-8000	smoothly	Very strict
707	41	Female	Undergraduate	Married	2	＞15	Emergency, Intensive Care Unit and Operating Room	Primary title	Very harmonious	Nurse	5000-8000	Not smooth	Very strict
708	36	Female	Undergraduate	Married	2	＞15	Outpatient and other	Intermediate title	Very harmonious	Nurse	＜5000	generally	Very strict
709	28	Female	Undergraduate	Married	1	6~10	Outpatient and other	Intermediate title	generally	Nurse	5000-8000	generally	Strict
710	37	Female	Undergraduate	Married	1	6~10	Outpatient and other	Intermediate title	Very harmonious	Nurse	5000-8000	Not smooth	Very strict
711	26	Female	Junior college	Single	0	≤5	Internal Medicine	Primary title	Harmonious	Nurse	＜5000	generally	Strict
712	39	Female	Undergraduate	Married	2	＞15	Surgical	Intermediate title	Harmonious	Nurse	5000-8000	Not smooth	Very strict
713	38	Female	Undergraduate	Married	1	＞15	Outpatient and other	Intermediate title	Very harmonious	Nurse	5000-8000	smoothly	Very strict
715	41	Female	Undergraduate	Single	0	＞15	Internal Medicine	Intermediate title	Harmonious	Nurse	＜5000	Not smooth	Very strict
716	31	Female	Undergraduate	Married	0	6~10	Pediatrics	Primary title	generally	Nurse	＜5000	Not smooth	Very strict
717	37	Female	Undergraduate	Married	2	11~15	Internal Medicine	Intermediate title	Very harmonious	Nurse	5000-8000	generally	Very strict
718	32	Male	Undergraduate	Single	0	11~15	Surgical	Primary title	Very harmonious	Nurse	5000-8000	Not smooth	Very strict
719	38	Female	Undergraduate	Married	2	11~15	Emergency, Intensive Care Unit and Operating Room	Intermediate title	Very harmonious	Nurse	5000-8000	smoothly	Strict
720	41	Female	Undergraduate	Married	2	＞15	Outpatient and other	Intermediate title	Harmonious	Nurse	＜5000	generally	Very strict
721	35	Female	Undergraduate	Married	2	11~15	Internal Medicine	Intermediate title	generally	Nurse	5000-8000	generally	Very strict
723	37	Female	Undergraduate	Married	0	＞15	Internal Medicine	Intermediate title	Very harmonious	Nurse	5000-8000	smoothly	Very strict
724	25	Female	Undergraduate	Single	0	≤5	Outpatient and other	Primary title	generally	Nurse	＜5000	generally	Very strict
725	39	Female	Undergraduate	Married	1	＞15	Internal Medicine	Intermediate title	Very harmonious	Nurse	>8000	generally	Very strict
726	40	Female	Undergraduate	Married	2	＞15	Outpatient and other	Senior title	Harmonious	Head nurse	＜5000	generally	Strict
727	33	Female	Undergraduate	Married	2	6~10	Emergency, Intensive Care Unit and Operating Room	Intermediate title	Harmonious	Nurse	5000-8000	smoothly	Strict
728	27	Female	Undergraduate	Single	0	≤5	Outpatient and other	Primary title	Very harmonious	Nurse	5000-8000	generally	Very strict
730	57	Female	Undergraduate	Married	1	＞15	Internal Medicine	Senior title	Harmonious	Head nurse	>8000	smoothly	Very strict
731	24	Female	Undergraduate	Single	0	≤5	Internal Medicine	Primary title	Harmonious	Nurse	5000-8000	generally	Strict
732	29	Female	Undergraduate	Married	0	6~10	Outpatient and other	Primary title	generally	Nurse	＜5000	generally	Very strict
733	36	Female	Undergraduate	Single	0	11~15	Outpatient and other	Primary title	Very harmonious	Nurse	5000-8000	generally	Very strict
734	33	Female	Undergraduate	Married	2	6~10	Outpatient and other	Intermediate title	Very harmonious	Nurse	5000-8000	generally	Very strict
735	37	Female	Undergraduate	Married	2	＞15	Emergency, Intensive Care Unit and Operating Room	Intermediate title	generally	Nurse	5000-8000	generally	Strict
736	37	Female	Undergraduate	Married	1	11~15	Surgical	Primary title	Very harmonious	Nurse	5000-8000	Not smooth	Very strict
737	27	Female	Undergraduate	Single	0	≤5	Outpatient and other	Primary title	generally	Nurse	＜5000	generally	Strict
738	33	Female	Undergraduate	Married	2	11~15	Internal Medicine	Intermediate title	Very harmonious	Nurse	5000-8000	generally	Very strict
739	25	Female	Undergraduate	Single	0	≤5	Emergency, Intensive Care Unit and Operating Room	Primary title	Very harmonious	Nurse	5000-8000	generally	Very strict
740	34	Female	Undergraduate	Married	1	11~15	Internal Medicine	Primary title	Harmonious	Nurse	5000-8000	Not smooth	Very strict
741	32	Male	Undergraduate	Married	1	6~10	Surgical	Intermediate title	Harmonious	Nurse	5000-8000	generally	Very strict
744	38	Female	Undergraduate	Married	2	11~15	Internal Medicine	Intermediate title	Harmonious	Nurse	5000-8000	Not smooth	Strict
745	29	Female	Master degree or above	Single	0	≤5	Obstetrics and Gynecology	Primary title	Harmonious	Nurse	5000-8000	generally	Very strict
746	36	Female	Undergraduate	Married	2	11~15	Internal Medicine	Intermediate title	Very harmonious	Nurse	5000-8000	smoothly	Very strict
747	38	Female	Undergraduate	Married	1	＞15	Obstetrics and Gynecology	Intermediate title	Very harmonious	Nurse	5000-8000	Not smooth	Very strict
748	42	Female	Undergraduate	Married	2	＞15	Internal Medicine	Senior title	Very harmonious	Head nurse	5000-8000	generally	Strict
749	25	Female	Undergraduate	Single	0	≤5	Internal Medicine	Primary title	generally	Nurse	5000-8000	generally	Very strict
750	31	Female	Undergraduate	Single	0	6~10	Obstetrics and Gynecology	Intermediate title	Harmonious	Nurse	>8000	smoothly	Very strict
751	41	Female	Undergraduate	Single	0	＞15	Outpatient and other	Intermediate title	generally	Head nurse	>8000	generally	Strict
752	27	Female	Undergraduate	Married	0	≤5	Internal Medicine	Primary title	generally	Nurse	＜5000	generally	Very strict
753	33	Female	Undergraduate	Single	0	11~15	Internal Medicine	Intermediate title	Very harmonious	Head nurse	＜5000	smoothly	generally
754	35	Female	Undergraduate	Married	1	11~15	Internal Medicine	Intermediate title	Harmonious	Nurse	5000-8000	generally	generally
755	42	Female	Undergraduate	Married	2	11~15	Pediatrics	Primary title	Very harmonious	Nurse	＜5000	smoothly	Very strict
757	37	Female	Undergraduate	Married	2	11~15	Outpatient and other	Intermediate title	generally	Nurse	5000-8000	smoothly	Strict
758	26	Female	Undergraduate	Single	0	≤5	Internal Medicine	Primary title	generally	Nurse	5000-8000	smoothly	Strict
759	27	Female	Undergraduate	Married	0	≤5	Outpatient and other	Primary title	generally	Nurse	＜5000	generally	Strict
760	34	Female	Undergraduate	Married	2	11~15	Internal Medicine	Intermediate title	generally	Nurse	5000-8000	Not smooth	Very strict
761	28	Female	Undergraduate	Married	0	≤5	Outpatient and other	Primary title	Very harmonious	Nurse	＜5000	generally	Very strict
762	37	Female	Undergraduate	Single	0	＞15	Internal Medicine	Primary title	Harmonious	Nurse	5000-8000	Not smooth	Very strict
763	32	Female	Undergraduate	Married	1	6~10	Internal Medicine	Primary title	Harmonious	Nurse	5000-8000	Not smooth	Strict
764	35	Male	Undergraduate	Married	1	11~15	Outpatient and other	Intermediate title	Harmonious	Nurse	5000-8000	smoothly	Strict
765	37	Female	Undergraduate	Married	2	＞15	Internal Medicine	Intermediate title	Very harmonious	Nurse	5000-8000	smoothly	Very strict
766	38	Female	Undergraduate	Widowed or separated	1	＞15	Internal Medicine	Primary title	Harmonious	Nurse	5000-8000	generally	Strict
767	36	Female	Undergraduate	Married	2	＞15	Internal Medicine	Intermediate title	Harmonious	Nurse	>8000	smoothly	Very strict
768	35	Female	Undergraduate	Single	0	11~15	Emergency, Intensive Care Unit and Operating Room	Intermediate title	Harmonious	Nurse	5000-8000	smoothly	Very strict
770	27	Female	Undergraduate	Married	0	≤5	Outpatient and other	Primary title	Harmonious	Nurse	5000-8000	generally	Strict
771	33	Female	Undergraduate	Married	1	11~15	Internal Medicine	Primary title	Harmonious	Nurse	5000-8000	Not smooth	Very strict
772	39	Female	Undergraduate	Married	2	＞15	Surgical	Intermediate title	Harmonious	Nurse	＜5000	smoothly	Strict
773	40	Female	Undergraduate	Married	2	＞15	Outpatient and other	Intermediate title	Very harmonious	Nurse	5000-8000	generally	Strict
774	33	Female	Undergraduate	Married	1	11~15	Emergency, Intensive Care Unit and Operating Room	Intermediate title	Harmonious	Nurse	5000-8000	Not smooth	Very strict
775	23	Male	Junior college	Single	0	≤5	Emergency, Intensive Care Unit and Operating Room	Primary title	generally	Nurse	＜5000	generally	Strict
776	32	Female	Undergraduate	Married	1	11~15	Internal Medicine	Primary title	Very harmonious	Nurse	5000-8000	generally	Very strict
777	32	Female	Undergraduate	Married	1	11~15	Internal Medicine	Primary title	Very harmonious	Nurse	＜5000	generally	Very strict
778	33	Male	Undergraduate	Married	2	11~15	Emergency, Intensive Care Unit and Operating Room	Intermediate title	Harmonious	Nurse	5000-8000	generally	Very strict
779	35	Female	Undergraduate	Married	2	11~15	Internal Medicine	Intermediate title	Very harmonious	Nurse	5000-8000	Not smooth	Very strict
780	28	Female	Undergraduate	Married	0	≤5	Emergency, Intensive Care Unit and Operating Room	Primary title	Harmonious	Nurse	＜5000	smoothly	Strict
781	36	Female	Undergraduate	Married	1	6~10	Internal Medicine	Primary title	Very harmonious	Nurse	5000-8000	Not smooth	Very strict
782	38	Female	Junior college	Married	2	11~15	Internal Medicine	Intermediate title	Very harmonious	Nurse	5000-8000	smoothly	Very strict
784	27	Female	Undergraduate	Single	0	≤5	Internal Medicine	Primary title	Very harmonious	Nurse	>8000	smoothly	Very strict
785	34	Female	Undergraduate	Married	2	11~15	Internal Medicine	Intermediate title	Harmonious	Nurse	5000-8000	smoothly	Very strict
786	35	Female	Undergraduate	Married	2	11~15	Internal Medicine	Primary title	Very harmonious	Nurse	5000-8000	generally	Very strict
787	34	Female	Undergraduate	Married	1	11~15	Internal Medicine	Intermediate title	Very harmonious	Nurse	5000-8000	generally	Strict
788	32	Female	Undergraduate	Married	1	11~15	Internal Medicine	Primary title	Very harmonious	Nurse	5000-8000	Not smooth	Strict
789	26	Female	Undergraduate	Married	0	≤5	Internal Medicine	Primary title	Harmonious	Nurse	5000-8000	generally	Strict
790	25	Female	Undergraduate	Single	0	≤5	Emergency, Intensive Care Unit and Operating Room	Primary title	Harmonious	Nurse	＜5000	generally	generally
791	24	Female	Junior college	Single	0	≤5	Outpatient and other	Primary title	generally	Nurse	＜5000	generally	generally
792	38	Female	Undergraduate	Married	2	＞15	Outpatient and other	Intermediate title	Very harmonious	Nurse	5000-8000	generally	Very strict
793	32	Female	Undergraduate	Married	2	6~10	Internal Medicine	Primary title	Harmonious	Nurse	5000-8000	Not smooth	Strict
794	34	Female	Undergraduate	Married	2	6~10	Surgical	Primary title	Harmonious	Nurse	＜5000	generally	Strict
795	59	Female	Undergraduate	Married	1	＞15	Internal Medicine	Senior title	Very harmonious	Nurse	5000-8000	smoothly	Very strict
796	37	Female	Undergraduate	Married	2	＞15	Internal Medicine	Primary title	Very harmonious	Nurse	5000-8000	generally	Strict
797	21	Female	Undergraduate	Single	0	≤5	Outpatient and other	Primary title	generally	Nurse	5000-8000	generally	generally
798	38	Female	Undergraduate	Married	2	＞15	Internal Medicine	Intermediate title	Very harmonious	Nurse	5000-8000	smoothly	Very strict
799	45	Female	Junior college	Married	1	＞15	Outpatient and other	Intermediate title	Very harmonious	Nurse	＜5000	smoothly	generally
800	40	Male	Undergraduate	Married	2	＞15	Outpatient and other	Intermediate title	generally	Nurse	＜5000	generally	Strict
801	23	Female	Junior college	Single	0	≤5	Outpatient and other	Primary title	generally	Nurse	5000-8000	generally	generally
802	34	Female	Undergraduate	Married	2	6~10	Internal Medicine	Primary title	Very harmonious	Nurse	＜5000	generally	Very strict
803	36	Female	Junior college	Married	2	11~15	Surgical	Intermediate title	Very harmonious	Nurse	>8000	smoothly	Very strict
804	48	Female	Junior college	Married	1	＞15	Internal Medicine	Intermediate title	generally	Head nurse	5000-8000	generally	generally
805	42	Female	Undergraduate	Widowed or separated	1	＞15	Surgical	Intermediate title	Very harmonious	Nurse	5000-8000	smoothly	Very strict
806	38	Female	Junior college	Married	2	6~10	Outpatient and other	Primary title	Very harmonious	Nurse	＜5000	Not smooth	Very strict
807	23	Female	Junior college	Single	0	≤5	Surgical	Primary title	generally	Nurse	＜5000	Not smooth	Strict
808	36	Female	Undergraduate	Married	1	11~15	Internal Medicine	Intermediate title	Very harmonious	Nurse	5000-8000	generally	Strict
809	34	Female	Undergraduate	Married	2	11~15	Emergency, Intensive Care Unit and Operating Room	Intermediate title	Harmonious	Nurse	5000-8000	generally	Strict
810	36	Female	Undergraduate	Married	2	11~15	Outpatient and other	Intermediate title	generally	Nurse	5000-8000	generally	Very strict
811	26	Female	Undergraduate	Single	0	≤5	Obstetrics and Gynecology	Primary title	Very harmonious	Nurse	5000-8000	smoothly	Very strict
812	25	Female	Undergraduate	Single	0	≤5	Internal Medicine	Primary title	Harmonious	Nurse	5000-8000	generally	Very strict
813	39	Male	Undergraduate	Married	2	11~15	Internal Medicine	Intermediate title	Very harmonious	Head nurse	5000-8000	smoothly	Very strict
814	39	Female	Undergraduate	Married	2	＞15	Emergency, Intensive Care Unit and Operating Room	Intermediate title	Very harmonious	Nurse	5000-8000	generally	generally
816	33	Female	Undergraduate	Married	2	11~15	Emergency, Intensive Care Unit and Operating Room	Primary title	Very harmonious	Nurse	5000-8000	generally	Strict
817	41	Female	Undergraduate	Married	2	＞15	Emergency, Intensive Care Unit and Operating Room	Intermediate title	Harmonious	Nurse	5000-8000	smoothly	Strict
818	38	Female	Undergraduate	Married	2	＞15	Surgical	Intermediate title	Harmonious	Head nurse	>8000	Not smooth	Very strict
819	40	Female	Undergraduate	Married	2	11~15	Outpatient and other	Intermediate title	Very harmonious	Nurse	5000-8000	smoothly	Strict
820	42	Female	Junior college	Widowed or separated	2	6~10	Outpatient and other	Primary title	generally	Head nurse	5000-8000	generally	generally
821	42	Female	Undergraduate	Married	0	＞15	Outpatient and other	Senior title	Harmonious	Head nurse	>8000	smoothly	Strict
822	38	Female	Undergraduate	Married	2	＞15	Emergency, Intensive Care Unit and Operating Room	Intermediate title	generally	Nurse	5000-8000	Not smooth	Very strict
823	48	Female	Undergraduate	Married	1	＞15	Outpatient and other	Intermediate title	Harmonious	Nurse	＜5000	generally	Very strict
824	24	Female	Junior college	Single	0	≤5	Outpatient and other	Primary title	generally	Nurse	＜5000	generally	generally
826	38	Female	Undergraduate	Married	2	＞15	Internal Medicine	Intermediate title	generally	Head nurse	>8000	Not smooth	Strict
828	26	Female	Undergraduate	Single	0	≤5	Internal Medicine	Primary title	Harmonious	Nurse	5000-8000	generally	Very strict
829	30	Female	Undergraduate	Married	2	11~15	Internal Medicine	Intermediate title	Harmonious	Nurse	5000-8000	Not smooth	Very strict
830	39	Female	Undergraduate	Married	1	＞15	Internal Medicine	Primary title	Harmonious	Nurse	5000-8000	Not smooth	Strict
831	30	Female	Undergraduate	Single	0	6~10	Emergency, Intensive Care Unit and Operating Room	Primary title	Very harmonious	Nurse	5000-8000	smoothly	Very strict
832	37	Female	Junior college	Married	1	11~15	Obstetrics and Gynecology	Intermediate title	Harmonious	Nurse	>8000	generally	Strict
833	25	Female	Undergraduate	Single	0	≤5	Emergency, Intensive Care Unit and Operating Room	Primary title	Very harmonious	Nurse	5000-8000	generally	Strict
834	32	Female	Undergraduate	Single	0	≤5	Emergency, Intensive Care Unit and Operating Room	Primary title	Harmonious	Nurse	＜5000	Not smooth	Very strict
835	42	Female	Undergraduate	Married	2	＞15	Outpatient and other	Intermediate title	Very harmonious	Head nurse	＜5000	smoothly	Very strict
836	32	Female	Undergraduate	Married	0	6~10	Outpatient and other	Intermediate title	generally	Nurse	5000-8000	smoothly	Strict
837	35	Female	Undergraduate	Married	2	11~15	Emergency, Intensive Care Unit and Operating Room	Primary title	Harmonious	Nurse	5000-8000	Not smooth	Very strict
838	26	Female	Undergraduate	Single	0	≤5	Surgical	Primary title	Very harmonious	Nurse	5000-8000	smoothly	Strict
839	28	Female	Undergraduate	Single	0	≤5	Surgical	Primary title	Harmonious	Nurse	5000-8000	smoothly	Strict
840	53	Female	Junior college	Married	1	＞15	Emergency, Intensive Care Unit and Operating Room	Intermediate title	Very harmonious	Nurse	>8000	smoothly	Strict
841	28	Female	Undergraduate	Married	0	6~10	Emergency, Intensive Care Unit and Operating Room	Primary title	Harmonious	Nurse	5000-8000	generally	Very strict
843	36	Female	Undergraduate	Married	2	11~15	Emergency, Intensive Care Unit and Operating Room	Primary title	Harmonious	Nurse	5000-8000	generally	Very strict
844	25	Female	Undergraduate	Single	0	≤5	Emergency, Intensive Care Unit and Operating Room	Primary title	Harmonious	Nurse	＜5000	generally	Strict
845	43	Female	Undergraduate	Married	2	＞15	Internal Medicine	Intermediate title	Very harmonious	Head nurse	5000-8000	smoothly	Strict
846	35	Female	Undergraduate	Married	2	11~15	Internal Medicine	Intermediate title	Very harmonious	Nurse	5000-8000	Not smooth	Very strict
848	31	Female	Undergraduate	Single	0	11~15	Outpatient and other	Primary title	Harmonious	Nurse	5000-8000	Not smooth	Strict
850	25	Female	Junior college	Single	0	≤5	Surgical	Primary title	Harmonious	Nurse	>8000	generally	Strict
851	24	Female	Undergraduate	Single	0	≤5	Surgical	Primary title	Harmonious	Nurse	5000-8000	smoothly	generally
852	35	Female	Undergraduate	Married	2	11~15	Internal Medicine	Primary title	Very harmonious	Nurse	5000-8000	generally	Very strict
853	25	Female	Undergraduate	Single	0	≤5	Internal Medicine	Primary title	generally	Nurse	5000-8000	generally	Very strict
854	42	Female	Undergraduate	Married	1	＞15	Surgical	Senior title	Very harmonious	Head nurse	5000-8000	generally	Very strict
855	39	Female	Undergraduate	Married	2	＞15	Emergency, Intensive Care Unit and Operating Room	Intermediate title	Harmonious	Nurse	5000-8000	Not smooth	Strict
856	36	Female	Undergraduate	Married	2	11~15	Emergency, Intensive Care Unit and Operating Room	Primary title	Very harmonious	Nurse	＜5000	Not smooth	Very strict
857	34	Female	Undergraduate	Married	1	＞15	Surgical	Intermediate title	Harmonious	Nurse	5000-8000	smoothly	Strict
858	26	Female	Undergraduate	Single	0	≤5	Internal Medicine	Primary title	generally	Nurse	＜5000	generally	Very strict
859	42	Female	Undergraduate	Married	1	＞15	Emergency, Intensive Care Unit and Operating Room	Intermediate title	Harmonious	Nurse	5000-8000	generally	Strict
860	27	Female	Undergraduate	Single	0	≤5	Emergency, Intensive Care Unit and Operating Room	Primary title	Harmonious	Nurse	5000-8000	smoothly	Strict
861	30	Male	Undergraduate	Married	2	6~10	Emergency, Intensive Care Unit and Operating Room	Primary title	Very harmonious	Nurse	5000-8000	smoothly	Strict
862	31	Female	Undergraduate	Married	>2个	6~10	Internal Medicine	Primary title	Very harmonious	Nurse	>8000	generally	Strict
863	32	Male	Undergraduate	Married	>2个	6~10	Emergency, Intensive Care Unit and Operating Room	Intermediate title	Harmonious	Nurse	5000-8000	smoothly	Very strict
864	36	Male	Undergraduate	Married	2	11~15	Emergency, Intensive Care Unit and Operating Room	Intermediate title	Harmonious	Nurse	5000-8000	Not smooth	Very strict
865	33	Female	Undergraduate	Married	1	6~10	Outpatient and other	Intermediate title	Harmonious	Nurse	＜5000	smoothly	Very strict
866	36	Female	Undergraduate	Married	1	11~15	Internal Medicine	Intermediate title	Very harmonious	Nurse	5000-8000	smoothly	Very strict
867	32	Female	Undergraduate	Married	1	11~15	Emergency, Intensive Care Unit and Operating Room	Intermediate title	Very harmonious	Nurse	5000-8000	smoothly	Very strict
868	38	Female	Undergraduate	Married	2	11~15	Emergency, Intensive Care Unit and Operating Room	Intermediate title	Very harmonious	Nurse	5000-8000	generally	Strict
869	39	Female	Undergraduate	Married	1	＞15	Internal Medicine	Intermediate title	Harmonious	Nurse	>8000	Not smooth	Very strict
870	32	Female	Undergraduate	Married	2	11~15	Internal Medicine	Intermediate title	Very harmonious	Nurse	5000-8000	smoothly	Very strict
871	24	Female	Undergraduate	Single	0	≤5	Outpatient and other	Primary title	Very harmonious	Nurse	＜5000	generally	Very strict
873	36	Female	Undergraduate	Married	2	11~15	Emergency, Intensive Care Unit and Operating Room	Intermediate title	Harmonious	Nurse	>8000	smoothly	Strict
874	33	Female	Undergraduate	Married	1	11~15	Outpatient and other	Intermediate title	Harmonious	Nurse	>8000	generally	Very strict
875	40	Female	Undergraduate	Married	1	11~15	Internal Medicine	Primary title	Very harmonious	Nurse	＜5000	Not smooth	Very strict
876	45	Female	Junior college	Married	1	＞15	Internal Medicine	Intermediate title	Very harmonious	Head nurse	＜5000	smoothly	generally
877	35	Female	Undergraduate	Married	1	11~15	Internal Medicine	Primary title	Disharmonious	Nurse	5000-8000	Not smooth	Very strict
878	35	Female	Undergraduate	Married	2	11~15	Emergency, Intensive Care Unit and Operating Room	Intermediate title	Very harmonious	Nurse	5000-8000	smoothly	Very strict
879	38	Female	Undergraduate	Married	2	11~15	Outpatient and other	Primary title	Very harmonious	Nurse	＜5000	generally	Strict
880	25	Female	Undergraduate	Single	0	≤5	Outpatient and other	Primary title	Harmonious	Nurse	＜5000	generally	Strict
881	33	Female	Junior college	Married	1	11~15	Outpatient and other	Primary title	Very harmonious	Nurse	＜5000	generally	Strict
882	54	Female	Junior college	Married	2	＞15	Emergency, Intensive Care Unit and Operating Room	Intermediate title	Very harmonious	Head nurse	5000-8000	smoothly	Very strict
883	38	Female	Undergraduate	Married	2	11~15	Outpatient and other	Intermediate title	Harmonious	Nurse	5000-8000	Not smooth	Strict
884	47	Female	Undergraduate	Married	1	＞15	Outpatient and other	Intermediate title	Very harmonious	Head nurse	5000-8000	smoothly	Very strict
885	27	Female	Undergraduate	Single	0	≤5	Surgical	Primary title	Harmonious	Nurse	5000-8000	generally	Very strict
886	41	Female	Junior college	Married	1	＞15	Surgical	Intermediate title	Very harmonious	Nurse	>8000	smoothly	Strict
887	27	Female	Undergraduate	Single	0	≤5	Surgical	Primary title	Harmonious	Nurse	>8000	smoothly	generally
889	38	Female	Undergraduate	Married	2	＞15	Surgical	Primary title	Very harmonious	Head nurse	5000-8000	smoothly	Strict
890	32	Female	Undergraduate	Married	2	11~15	Internal Medicine	Intermediate title	Very harmonious	Nurse	5000-8000	smoothly	Very strict
891	39	Female	Undergraduate	Married	2	11~15	Outpatient and other	Intermediate title	Very harmonious	Head nurse	>8000	Not smooth	Very strict
892	44	Female	Undergraduate	Married	1	＞15	Internal Medicine	Senior title	Very harmonious	Head nurse	>8000	smoothly	Very strict
893	25	Female	Undergraduate	Single	0	≤5	Internal Medicine	Primary title	Very harmonious	Nurse	5000-8000	generally	Very strict
895	30	Female	Undergraduate	Married	0	6~10	Internal Medicine	Primary title	Very harmonious	Nurse	5000-8000	smoothly	Very strict
896	42	Female	Undergraduate	Married	2	＞15	Internal Medicine	Senior title	Very harmonious	Head nurse	>8000	smoothly	Very strict
897	55	Female	Junior college	Married	1	＞15	Internal Medicine	Senior title	Harmonious	Nurse	>8000	generally	Strict
898	35	Female	Undergraduate	Married	1	11~15	Internal Medicine	Intermediate title	Very harmonious	Nurse	＜5000	smoothly	Very strict
899	35	Female	Undergraduate	Married	2	11~15	Internal Medicine	Primary title	Harmonious	Nurse	5000-8000	Not smooth	Very strict
900	39	Female	Undergraduate	Married	2	＞15	Internal Medicine	Intermediate title	Harmonious	Nurse	5000-8000	generally	Very strict
901	41	Female	Undergraduate	Married	2	＞15	Internal Medicine	Intermediate title	Harmonious	Nurse	5000-8000	smoothly	Strict
902	25	Female	Undergraduate	Married	0	≤5	Internal Medicine	Primary title	Very harmonious	Nurse	5000-8000	generally	Strict
903	23	Female	Undergraduate	Single	0	≤5	Internal Medicine	Primary title	Very harmonious	Nurse	＜5000	generally	Very strict
904	36	Female	Undergraduate	Married	1	11~15	Internal Medicine	Intermediate title	Harmonious	Nurse	5000-8000	Not smooth	Very strict
905	33	Female	Undergraduate	Married	2	11~15	Internal Medicine	Primary title	generally	Nurse	＜5000	Not smooth	Strict
906	37	Female	Undergraduate	Married	2	＞15	Internal Medicine	Intermediate title	Very harmonious	Nurse	5000-8000	generally	Strict
907	25	Female	Undergraduate	Single	0	≤5	Internal Medicine	Primary title	generally	Nurse	5000-8000	Not smooth	Very strict
908	36	Female	Undergraduate	Married	1	＞15	Internal Medicine	Primary title	Very harmonious	Nurse	＜5000	Not smooth	Very strict
909	36	Female	Undergraduate	Married	2	11~15	Internal Medicine	Primary title	Very harmonious	Nurse	5000-8000	Not smooth	Very strict
910	41	Female	Junior college	Married	2	＞15	Internal Medicine	Intermediate title	Very harmonious	Nurse	5000-8000	smoothly	Very strict
911	35	Female	Undergraduate	Married	1	11~15	Internal Medicine	Primary title	Very harmonious	Nurse	5000-8000	generally	Very strict
912	33	Female	Undergraduate	Married	1	11~15	Internal Medicine	Intermediate title	Harmonious	Nurse	>8000	generally	Very strict
913	39	Female	Junior college	Married	2	11~15	Emergency, Intensive Care Unit and Operating Room	Intermediate title	Harmonious	Nurse	5000-8000	generally	Very strict
914	26	Female	Undergraduate	Single	0	≤5	Emergency, Intensive Care Unit and Operating Room	Primary title	Harmonious	Nurse	5000-8000	smoothly	generally
915	38	Female	Undergraduate	Single	0	11~15	Emergency, Intensive Care Unit and Operating Room	Intermediate title	Harmonious	Nurse	5000-8000	Not smooth	Very strict
916	27	Female	Undergraduate	Married	0	≤5	Internal Medicine	Primary title	Very harmonious	Nurse	5000-8000	generally	Strict
917	35	Female	Undergraduate	Married	2	11~15	Emergency, Intensive Care Unit and Operating Room	Intermediate title	Harmonious	Nurse	5000-8000	smoothly	Very strict
919	34	Female	Undergraduate	Married	1	11~15	Outpatient and other	Intermediate title	Very harmonious	Nurse	5000-8000	smoothly	Strict
920	43	Female	Undergraduate	Married	1	＞15	Emergency, Intensive Care Unit and Operating Room	Senior title	Very harmonious	Head nurse	>8000	Not smooth	Very strict
921	35	Female	Undergraduate	Married	2	11~15	Emergency, Intensive Care Unit and Operating Room	Intermediate title	Harmonious	Head nurse	5000-8000	smoothly	Very strict
922	37	Female	Undergraduate	Married	1	11~15	Outpatient and other	Intermediate title	Very harmonious	Nurse	＜5000	smoothly	Very strict
923	24	Female	Undergraduate	Single	0	≤5	Internal Medicine	Primary title	generally	Nurse	>8000	Not smooth	Strict
924	26	Female	Undergraduate	Single	0	≤5	Internal Medicine	Primary title	Harmonious	Nurse	5000-8000	generally	Very strict
925	25	Female	Undergraduate	Single	0	≤5	Obstetrics and Gynecology	Primary title	Harmonious	Nurse	5000-8000	generally	Very strict
926	24	Female	Undergraduate	Single	0	≤5	Emergency, Intensive Care Unit and Operating Room	Primary title	generally	Nurse	5000-8000	generally	Strict
927	23	Female	Undergraduate	Single	0	≤5	Outpatient and other	Primary title	Very harmonious	Nurse	5000-8000	smoothly	Very strict
928	24	Female	Junior college	Single	0	≤5	Outpatient and other	Primary title	Very harmonious	Nurse	＜5000	generally	Very strict
929	23	Female	Undergraduate	Single	0	≤5	Internal Medicine	Primary title	Very harmonious	Nurse	>8000	generally	Very strict
930	25	Female	Undergraduate	Single	0	≤5	Internal Medicine	Primary title	Harmonious	Nurse	>8000	smoothly	Very strict
931	23	Female	Undergraduate	Single	0	≤5	Outpatient and other	Primary title	Very harmonious	Nurse	5000-8000	generally	Very strict
932	23	Female	Undergraduate	Single	0	≤5	Internal Medicine	Primary title	Very harmonious	Nurse	>8000	generally	Strict
933	24	Female	Undergraduate	Single	0	≤5	Internal Medicine	Primary title	Harmonious	Nurse	＜5000	smoothly	Very strict
935	26	Female	Undergraduate	Single	0	≤5	Internal Medicine	Primary title	Harmonious	Nurse	＜5000	generally	Very strict
936	25	Female	Undergraduate	Single	0	≤5	Internal Medicine	Primary title	Very harmonious	Nurse	＜5000	generally	Strict
937	24	Female	Undergraduate	Single	0	≤5	Outpatient and other	Primary title	Very harmonious	Nurse	＜5000	Not smooth	Very strict
940	24	Female	Undergraduate	Single	0	≤5	Outpatient and other	Primary title	Very harmonious	Nurse	＜5000	generally	Strict
941	26	Female	Undergraduate	Single	0	≤5	Emergency, Intensive Care Unit and Operating Room	Primary title	Harmonious	Nurse	5000-8000	generally	Strict
942	24	Female	Undergraduate	Single	0	≤5	Surgical	Primary title	Very harmonious	Nurse	5000-8000	smoothly	Very strict
943	23	Female	Junior college	Single	0	≤5	Obstetrics and Gynecology	Primary title	Very harmonious	Nurse	>8000	smoothly	Very strict
944	24	Female	Undergraduate	Single	0	≤5	Surgical	Primary title	Very harmonious	Nurse	5000-8000	smoothly	Very strict
945	25	Female	Undergraduate	Single	0	≤5	Emergency, Intensive Care Unit and Operating Room	Primary title	Harmonious	Nurse	5000-8000	generally	Strict
946	45	Female	Undergraduate	Married	2	＞15	Emergency, Intensive Care Unit and Operating Room	Intermediate title	Harmonious	Nurse	＜5000	smoothly	Strict
947	24	Female	Undergraduate	Single	0	≤5	Obstetrics and Gynecology	Primary title	Very harmonious	Nurse	＜5000	smoothly	Very strict
949	37	Female	Undergraduate	Married	2	11~15	Emergency, Intensive Care Unit and Operating Room	Intermediate title	Harmonious	Nurse	5000-8000	smoothly	Strict
950	26	Female	Undergraduate	Single	0	≤5	Outpatient and other	Primary title	generally	Nurse	5000-8000	generally	Strict
951	25	Female	Undergraduate	Single	0	≤5	Obstetrics and Gynecology	Primary title	generally	Nurse	＜5000	generally	Very strict
952	25	Female	Undergraduate	Single	0	≤5	Surgical	Primary title	Harmonious	Nurse	＜5000	generally	Strict
953	23	Female	Undergraduate	Single	0	≤5	Internal Medicine	Primary title	Harmonious	Nurse	＜5000	smoothly	Strict
954	26	Female	Undergraduate	Single	0	≤5	Internal Medicine	Primary title	Harmonious	Nurse	5000-8000	generally	Very strict
956	26	Male	Undergraduate	Single	0	≤5	Emergency, Intensive Care Unit and Operating Room	Primary title	Harmonious	Nurse	5000-8000	generally	Strict
957	24	Female	Undergraduate	Single	0	≤5	Emergency, Intensive Care Unit and Operating Room	Primary title	Harmonious	Nurse	＜5000	generally	Strict
958	25	Female	Undergraduate	Single	0	≤5	Emergency, Intensive Care Unit and Operating Room	Primary title	Harmonious	Nurse	＜5000	generally	Very strict
959	34	Female	Undergraduate	Married	1	6~10	Outpatient and other	Primary title	Harmonious	Nurse	＜5000	smoothly	Very strict
960	23	Female	Undergraduate	Single	0	≤5	Outpatient and other	Primary title	generally	Nurse	＜5000	generally	Strict
961	36	Female	Undergraduate	Married	2	11~15	Internal Medicine	Intermediate title	Very harmonious	Nurse	>8000	smoothly	Strict
962	28	Female	Undergraduate	Single	0	≤5	Emergency, Intensive Care Unit and Operating Room	Primary title	generally	Nurse	5000-8000	Not smooth	Strict
964	45	Female	Undergraduate	Married	1	＞15	Internal Medicine	Intermediate title	Harmonious	Head nurse	>8000	Not smooth	Strict
965	38	Female	Junior college	Married	2	＞15	Internal Medicine	Intermediate title	generally	Nurse	＜5000	Not smooth	Strict
966	39	Female	Undergraduate	Married	2	＞15	Outpatient and other	Intermediate title	Harmonious	Nurse	>8000	Not smooth	Strict
967	23	Female	Undergraduate	Single	0	≤5	Outpatient and other	Primary title	generally	Nurse	＜5000	generally	Strict
968	29	Female	Undergraduate	Married	1	6~10	Surgical	Primary title	Harmonious	Nurse	5000-8000	smoothly	Strict
969	30	Female	Undergraduate	Married	1	6~10	Surgical	Intermediate title	Harmonious	Nurse	>8000	smoothly	Very strict
970	36	Female	Undergraduate	Married	1	＞15	Internal Medicine	Intermediate title	generally	Nurse	>8000	smoothly	generally
971	29	Female	Undergraduate	Single	0	6~10	Surgical	Primary title	Harmonious	Nurse	>8000	generally	Strict
972	23	Female	Junior college	Single	0	≤5	Surgical	Primary title	Harmonious	Nurse	＜5000	smoothly	Strict
973	37	Female	Undergraduate	Married	1	＞15	Surgical	Intermediate title	Harmonious	Nurse	5000-8000	Not smooth	Strict
974	30	Female	Undergraduate	Married	1	6~10	Pediatrics	Intermediate title	Harmonious	Nurse	5000-8000	generally	Strict
975	32	Female	Undergraduate	Single	0	11~15	Internal Medicine	Intermediate title	generally	Nurse	5000-8000	generally	Very strict
976	36	Female	Undergraduate	Married	2	11~15	Surgical	Primary title	Very harmonious	Nurse	＜5000	smoothly	Strict
977	25	Male	Undergraduate	Single	0	≤5	Emergency, Intensive Care Unit and Operating Room	Primary title	Harmonious	Nurse	5000-8000	generally	Strict
978	32	Female	Undergraduate	Single	0	6~10	Internal Medicine	Primary title	Very harmonious	Nurse	>8000	generally	Very strict
979	38	Female	Junior college	Married	2	11~15	Internal Medicine	Intermediate title	Harmonious	Nurse	＜5000	generally	Strict
980	38	Female	Undergraduate	Married	2	11~15	Outpatient and other	Intermediate title	Harmonious	Nurse	＜5000	Not smooth	Strict
981	25	Female	Undergraduate	Single	0	≤5	Internal Medicine	Primary title	Harmonious	Nurse	5000-8000	smoothly	Strict
982	29	Female	Undergraduate	Single	0	≤5	Internal Medicine	Primary title	Harmonious	Nurse	5000-8000	smoothly	Very strict
983	32	Female	Junior college	Single	0	6~10	Internal Medicine	Primary title	Very harmonious	Nurse	5000-8000	generally	Very strict
984	26	Female	Undergraduate	Single	0	≤5	Obstetrics and Gynecology	Primary title	Harmonious	Nurse	5000-8000	generally	Very strict
985	24	Female	Undergraduate	Single	0	≤5	Pediatrics	Primary title	Very harmonious	Nurse	5000-8000	smoothly	Very strict
986	30	Female	Undergraduate	Single	0	6~10	Internal Medicine	Primary title	Harmonious	Nurse	5000-8000	smoothly	Strict
987	28	Female	Undergraduate	Married	0	≤5	Internal Medicine	Primary title	Harmonious	Nurse	5000-8000	smoothly	Very strict
988	26	Female	Undergraduate	Single	0	≤5	Surgical	Primary title	Very harmonious	Nurse	5000-8000	smoothly	generally
989	27	Female	Undergraduate	Single	0	≤5	Surgical	Primary title	Harmonious	Nurse	5000-8000	generally	Very strict
990	36	Female	Undergraduate	Married	2	＞15	Internal Medicine	Intermediate title	Harmonious	Nurse	>8000	generally	Very strict
991	26	Female	Undergraduate	Married	0	≤5	Obstetrics and Gynecology	Primary title	Very harmonious	Nurse	5000-8000	smoothly	Very strict
992	38	Female	Undergraduate	Single	0	11~15	Internal Medicine	Intermediate title	Very harmonious	Nurse	5000-8000	Not smooth	Very strict
993	35	Female	Undergraduate	Married	1	11~15	Internal Medicine	Intermediate title	Very harmonious	Nurse	5000-8000	generally	Strict
994	38	Female	Undergraduate	Married	2	11~15	Internal Medicine	Primary title	Harmonious	Nurse	5000-8000	Not smooth	Very strict
995	28	Female	Undergraduate	Single	0	≤5	Internal Medicine	Primary title	Harmonious	Nurse	5000-8000	generally	Strict
996	32	Female	Undergraduate	Married	1	6~10	Surgical	Primary title	Harmonious	Nurse	5000-8000	generally	Strict
997	28	Female	Undergraduate	Married	0	≤5	Internal Medicine	Primary title	Harmonious	Nurse	5000-8000	smoothly	Strict
998	28	Female	Undergraduate	Single	0	≤5	Internal Medicine	Primary title	Harmonious	Nurse	5000-8000	generally	Very strict
999	30	Female	Undergraduate	Married	1	11~15	Internal Medicine	Intermediate title	Very harmonious	Nurse	5000-8000	smoothly	Very strict
1000	30	Female	Undergraduate	Married	1	6~10	Internal Medicine	Primary title	Harmonious	Nurse	5000-8000	generally	Strict
1001	39	Female	Undergraduate	Married	2	11~15	Surgical	Intermediate title	Very harmonious	Nurse	5000-8000	generally	Very strict
1002	30	Female	Undergraduate	Married	1	6~10	Internal Medicine	Primary title	Very harmonious	Nurse	>8000	smoothly	Strict
1003	31	Female	Undergraduate	Married	1	6~10	Surgical	Intermediate title	Harmonious	Nurse	>8000	generally	Strict
1004	42	Female	Undergraduate	Married	2	＞15	Outpatient and other	Intermediate title	Harmonious	Head nurse	5000-8000	Not smooth	generally
1005	52	Female	Undergraduate	Married	1	＞15	Internal Medicine	Senior title	Very harmonious	Head nurse	5000-8000	smoothly	Very strict
1006	40	Female	Undergraduate	Married	2	＞15	Internal Medicine	Intermediate title	Very harmonious	Head nurse	5000-8000	Not smooth	generally
1007	59	Female	Undergraduate	Married	1	＞15	Outpatient and other	Senior title	Harmonious	Head nurse	>8000	smoothly	Strict
1008	33	Female	Undergraduate	Married	2	6~10	Internal Medicine	Intermediate title	generally	Nurse	＜5000	Not smooth	Very strict
1009	40	Female	Undergraduate	Married	1	＞15	Internal Medicine	Intermediate title	Very harmonious	Nurse	5000-8000	generally	generally
1010	23	Female	Junior college	Single	0	≤5	Outpatient and other	Primary title	Harmonious	Nurse	＜5000	generally	Strict
1011	23	Female	Junior college	Single	0	≤5	Outpatient and other	Primary title	Harmonious	Nurse	＜5000	generally	Strict
1012	42	Female	Undergraduate	Married	1	＞15	Internal Medicine	Senior title	Harmonious	Head nurse	5000-8000	generally	Strict
1013	50	Female	Junior college	Married	1	＞15	Internal Medicine	Primary title	generally	Head nurse	5000-8000	generally	generally
1014	33	Female	Undergraduate	Married	1	6~10	Internal Medicine	Intermediate title	Harmonious	Nurse	5000-8000	generally	Very strict
1015	40	Female	Undergraduate	Married	1	＞15	Emergency, Intensive Care Unit and Operating Room	Intermediate title	Very harmonious	Nurse	5000-8000	generally	Strict
1016	52	Female	Undergraduate	Married	1	＞15	Surgical	Senior title	Very harmonious	Head nurse	5000-8000	smoothly	Very strict
1017	47	Female	Undergraduate	Married	1	＞15	Surgical	Senior title	Very harmonious	Head nurse	>8000	Not smooth	generally
1019	35	Female	Undergraduate	Married	2	11~15	Internal Medicine	Intermediate title	Very harmonious	Nurse	＜5000	generally	Very strict
1020	44	Female	Undergraduate	Married	2	＞15	Outpatient and other	Intermediate title	Very harmonious	Nurse	＜5000	Not smooth	Very strict
1021	44	Female	Undergraduate	Married	2	＞15	Outpatient and other	Intermediate title	Harmonious	Nurse	5000-8000	Not smooth	Strict
1022	40	Female	Undergraduate	Married	1	＞15	Emergency, Intensive Care Unit and Operating Room	Intermediate title	Harmonious	Nurse	>8000	smoothly	Strict
1023	38	Female	Undergraduate	Married	2	＞15	Internal Medicine	Intermediate title	Very harmonious	Head nurse	＜5000	Not smooth	Very strict
1024	42	Female	Undergraduate	Married	2	＞15	Outpatient and other	Intermediate title	generally	Head nurse	＜5000	smoothly	Strict
1025	48	Female	Undergraduate	Married	1	＞15	Internal Medicine	Senior title	Very harmonious	Head nurse	5000-8000	Not smooth	Very strict
1026	48	Female	Undergraduate	Married	2	＞15	Internal Medicine	Intermediate title	Very harmonious	Head nurse	＜5000	Not smooth	Strict
1028	54	Female	Junior college	Married	1	＞15	Outpatient and other	Senior title	Harmonious	Head nurse	5000-8000	smoothly	Strict
1029	39	Female	Undergraduate	Married	2	＞15	Internal Medicine	Intermediate title	Very harmonious	Head nurse	5000-8000	generally	Strict
1030	43	Female	Undergraduate	Married	2	＞15	Internal Medicine	Intermediate title	Very harmonious	Head nurse	5000-8000	smoothly	generally
1031	46	Female	Undergraduate	Married	1	＞15	Internal Medicine	Intermediate title	Harmonious	Head nurse	5000-8000	generally	Very strict
1032	47	Female	Junior college	Married	2	＞15	Internal Medicine	Intermediate title	Harmonious	Head nurse	＜5000	Not smooth	Strict
1033	45	Female	Undergraduate	Married	2	＞15	Outpatient and other	Intermediate title	Harmonious	Nurse	5000-8000	generally	Strict
1034	40	Female	Undergraduate	Married	1	＞15	Outpatient and other	Senior title	Very harmonious	Nurse	5000-8000	smoothly	Strict
1035	40	Female	Undergraduate	Married	1	＞15	Outpatient and other	Senior title	Very harmonious	Nurse	5000-8000	generally	generally
1036	32	Female	Undergraduate	Married	1	6~10	Outpatient and other	Intermediate title	Harmonious	Nurse	＜5000	Not smooth	Strict
1038	36	Female	Undergraduate	Married	2	6~10	Outpatient and other	Intermediate title	Harmonious	Nurse	5000-8000	generally	Very strict
1039	31	Female	Junior college	Married	1	6~10	Outpatient and other	Primary title	generally	Nurse	5000-8000	generally	Strict
1040	35	Female	Undergraduate	Married	1	11~15	Outpatient and other	Primary title	Harmonious	Nurse	＜5000	generally	Very strict
1041	30	Female	Undergraduate	Married	2	6~10	Outpatient and other	Primary title	Very harmonious	Nurse	5000-8000	Not smooth	Strict
1042	34	Female	Undergraduate	Single	0	11~15	Outpatient and other	Primary title	Very harmonious	Nurse	5000-8000	Not smooth	Strict
1044	47	Female	Junior college	Single	0	＞15	Outpatient and other	Intermediate title	Harmonious	Nurse	5000-8000	Not smooth	Strict
1045	38	Female	Undergraduate	Married	2	11~15	Outpatient and other	Primary title	Harmonious	Nurse	5000-8000	Not smooth	Very strict
1046	41	Female	Undergraduate	Married	1	11~15	Outpatient and other	Primary title	Harmonious	Nurse	5000-8000	Not smooth	Very strict
1048	37	Female	Undergraduate	Single	0	＞15	Outpatient and other	Intermediate title	Harmonious	Nurse	5000-8000	smoothly	Very strict
1049	36	Female	Undergraduate	Married	2	11~15	Outpatient and other	Intermediate title	Very harmonious	Nurse	5000-8000	smoothly	Very strict
1050	33	Female	Undergraduate	Single	0	11~15	Outpatient and other	Primary title	Harmonious	Nurse	5000-8000	Not smooth	Very strict
1051	42	Female	Undergraduate	Married	2	＞15	Outpatient and other	Intermediate title	Very harmonious	Nurse	5000-8000	generally	Strict
1052	33	Female	Undergraduate	Married	1	11~15	Outpatient and other	Primary title	Very harmonious	Nurse	＜5000	smoothly	Strict
1053	31	Female	Undergraduate	Married	1	6~10	Outpatient and other	Intermediate title	Harmonious	Nurse	＜5000	generally	Strict
1054	38	Female	Undergraduate	Married	1	11~15	Outpatient and other	Intermediate title	Harmonious	Nurse	＜5000	Not smooth	Strict
1056	22	Male	Undergraduate	Single	0	11~15	Surgical	Senior title	Very harmonious	Nurse	＜5000	generally	Strict
1057	48	Male	Junior college	Single	0	＞15	Surgical	Senior title	Very harmonious	Nurse	＜5000	smoothly	Strict
1058	20	Male	Junior college	Single	0	≤5	Surgical	Primary title	Very harmonious	Nurse	＜5000	smoothly	Very strict
1059	20	Female	Junior college	Single	0	≤5	Surgical	Primary title	Very harmonious	Nurse	＜5000	Not smooth	Strict
1060	20	Male	Junior college	Single	0	≤5	Surgical	Primary title	Very harmonious	Nurse	＜5000	smoothly	Strict
1061	20	Female	Junior college	Single	0	≤5	Surgical	Primary title	Very harmonious	Nurse	＜5000	smoothly	Strict
1062	39	Female	Undergraduate	Married	1	＞15	Internal Medicine	Intermediate title	Harmonious	Nurse	＜5000	generally	Strict
1063	31	Female	Junior college	Married	1	6~10	Internal Medicine	Primary title	Harmonious	Nurse	＜5000	Not smooth	generally
1064	35	Female	Junior college	Married	1	11~15	Internal Medicine	Intermediate title	Harmonious	Nurse	＜5000	Not smooth	generally
1066	40	Female	Undergraduate	Married	2	＞15	Internal Medicine	Intermediate title	Harmonious	Nurse	＜5000	generally	generally
1068	24	Female	Undergraduate	Single	0	≤5	Emergency, Intensive Care Unit and Operating Room	Primary title	Harmonious	Nurse	＜5000	generally	Strict
1069	29	Female	Undergraduate	Married	0	≤5	Internal Medicine	Primary title	Harmonious	Nurse	＜5000	generally	Very strict
1070	28	Female	Undergraduate	Married	0	≤5	Emergency, Intensive Care Unit and Operating Room	Primary title	Very harmonious	Nurse	5000-8000	Not smooth	Strict
1071	38	Female	Undergraduate	Married	2	6~10	Outpatient and other	Primary title	Harmonious	Head nurse	5000-8000	smoothly	Strict
1072	25	Female	Undergraduate	Single	0	≤5	Emergency, Intensive Care Unit and Operating Room	Primary title	Very harmonious	Nurse	＜5000	generally	Strict
1073	34	Female	Junior college	Married	2	6~10	Emergency, Intensive Care Unit and Operating Room	Intermediate title	Very harmonious	Nurse	5000-8000	smoothly	Very strict
1074	26	Female	Undergraduate	Single	0	≤5	Internal Medicine	Primary title	Very harmonious	Nurse	5000-8000	generally	Very strict
1075	26	Female	Undergraduate	Single	0	≤5	Internal Medicine	Primary title	Very harmonious	Nurse	5000-8000	generally	Very strict
1076	26	Female	Undergraduate	Single	0	≤5	Emergency, Intensive Care Unit and Operating Room	Primary title	Very harmonious	Nurse	＜5000	generally	Very strict
1077	28	Female	Undergraduate	Married	0	≤5	Internal Medicine	Primary title	Harmonious	Nurse	5000-8000	smoothly	Very strict
1078	27	Female	Undergraduate	Single	0	≤5	Surgical	Primary title	Very harmonious	Nurse	5000-8000	smoothly	Very strict
1079	26	Female	Undergraduate	Single	0	≤5	Internal Medicine	Primary title	Very harmonious	Nurse	5000-8000	generally	Very strict
1080	28	Female	Undergraduate	Single	0	≤5	Obstetrics and Gynecology	Primary title	Very harmonious	Nurse	5000-8000	generally	Very strict
1081	26	Female	Undergraduate	Single	0	≤5	Emergency, Intensive Care Unit and Operating Room	Primary title	Very harmonious	Nurse	＜5000	generally	Strict
1082	45	Female	Undergraduate	Married	2	＞15	Outpatient and other	Intermediate title	Very harmonious	Nurse	>8000	Not smooth	Very strict
1084	38	Female	Undergraduate	Married	2	＞15	Pediatrics	Intermediate title	Harmonious	Head nurse	5000-8000	generally	Strict
1085	34	Female	Undergraduate	Married	1	11~15	Surgical	Primary title	Harmonious	Nurse	5000-8000	smoothly	Very strict
1086	51	Female	Undergraduate	Married	1	＞15	Surgical	Senior title	Very harmonious	Head nurse	5000-8000	generally	Strict
1087	25	Female	Undergraduate	Single	0	≤5	Obstetrics and Gynecology	Primary title	Very harmonious	Nurse	5000-8000	generally	Very strict
1088	28	Female	Undergraduate	Married	1	≤5	Internal Medicine	Primary title	Very harmonious	Nurse	5000-8000	smoothly	Strict
1090	40	Female	Undergraduate	Married	2	＞15	Internal Medicine	Senior title	Very harmonious	Head nurse	5000-8000	smoothly	Very strict
1091	29	Female	Undergraduate	Single	0	≤5	Obstetrics and Gynecology	Primary title	Very harmonious	Nurse	5000-8000	smoothly	Very strict
1092	27	Female	Undergraduate	Single	0	≤5	Internal Medicine	Primary title	Very harmonious	Nurse	＜5000	generally	Very strict
1093	41	Female	Undergraduate	Married	2	＞15	Internal Medicine	Senior title	Very harmonious	Head nurse	5000-8000	smoothly	Very strict
1095	26	Female	Undergraduate	Single	0	≤5	Emergency, Intensive Care Unit and Operating Room	Primary title	Very harmonious	Nurse	＜5000	smoothly	Very strict
1096	32	Female	Undergraduate	Married	0	11~15	Outpatient and other	Intermediate title	Very harmonious	Head nurse	5000-8000	smoothly	Strict
1097	40	Female	Undergraduate	Married	2	11~15	Internal Medicine	Intermediate title	Very harmonious	Head nurse	5000-8000	generally	Very strict
1098	40	Female	Undergraduate	Married	2	11~15	Internal Medicine	Intermediate title	Very harmonious	Nurse	5000-8000	Not smooth	Very strict
1099	27	Female	Undergraduate	Married	0	≤5	Internal Medicine	Primary title	Harmonious	Nurse	5000-8000	generally	Very strict
1100	40	Female	Undergraduate	Married	2	＞15	Internal Medicine	Senior title	Harmonious	Head nurse	>8000	smoothly	Very strict
1101	36	Female	Undergraduate	Married	2	11~15	Surgical	Intermediate title	Very harmonious	Nurse	5000-8000	Not smooth	Strict
1102	33	Female	Undergraduate	Married	1	11~15	Outpatient and other	Intermediate title	Very harmonious	Head nurse	5000-8000	generally	Strict
1103	41	Female	Undergraduate	Married	1	＞15	Internal Medicine	Intermediate title	Very harmonious	Nurse	5000-8000	Not smooth	Very strict
1104	35	Female	Undergraduate	Married	1	6~10	Obstetrics and Gynecology	Primary title	Very harmonious	Nurse	5000-8000	Not smooth	Very strict
1105	39	Female	Undergraduate	Single	0	11~15	Emergency, Intensive Care Unit and Operating Room	Intermediate title	Very harmonious	Nurse	＜5000	smoothly	Very strict
1106	37	Female	Undergraduate	Married	>2个	11~15	Internal Medicine	Intermediate title	Very harmonious	Nurse	5000-8000	smoothly	Strict
1107	38	Female	Undergraduate	Married	1	＞15	Outpatient and other	Intermediate title	Very harmonious	Head nurse	5000-8000	generally	Very strict
1108	34	Female	Junior college	Married	2	＞15	Obstetrics and Gynecology	Intermediate title	Very harmonious	Nurse	5000-8000	smoothly	Very strict
1109	33	Female	Undergraduate	Married	1	11~15	Internal Medicine	Primary title	Very harmonious	Nurse	5000-8000	smoothly	Very strict
1111	26	Female	Undergraduate	Married	0	≤5	Internal Medicine	Primary title	Very harmonious	Nurse	5000-8000	generally	Strict
1112	40	Female	Undergraduate	Married	2	＞15	Emergency, Intensive Care Unit and Operating Room	Intermediate title	Very harmonious	Nurse	>8000	smoothly	Very strict
1113	37	Female	Undergraduate	Married	2	6~10	Outpatient and other	Primary title	Harmonious	Head nurse	5000-8000	generally	Strict
1114	37	Female	Undergraduate	Married	2	＞15	Emergency, Intensive Care Unit and Operating Room	Intermediate title	Very harmonious	Head nurse	>8000	Not smooth	Very strict
1115	36	Female	Undergraduate	Married	1	11~15	Emergency, Intensive Care Unit and Operating Room	Primary title	Harmonious	Nurse	5000-8000	generally	Strict
1116	34	Female	Undergraduate	Married	2	6~10	Surgical	Intermediate title	Very harmonious	Nurse	>8000	Not smooth	Very strict
1117	36	Female	Undergraduate	Single	0	11~15	Emergency, Intensive Care Unit and Operating Room	Intermediate title	Harmonious	Nurse	5000-8000	smoothly	Very strict
1118	36	Female	Undergraduate	Married	1	11~15	Emergency, Intensive Care Unit and Operating Room	Primary title	Very harmonious	Nurse	5000-8000	Not smooth	Strict
1119	36	Female	Undergraduate	Married	2	11~15	Surgical	Intermediate title	Very harmonious	Head nurse	5000-8000	smoothly	Very strict
1120	36	Female	Undergraduate	Married	1	＞15	Emergency, Intensive Care Unit and Operating Room	Intermediate title	Very harmonious	Nurse	5000-8000	smoothly	Very strict
1121	37	Female	Undergraduate	Married	1	＞15	Internal Medicine	Intermediate title	Very harmonious	Head nurse	>8000	smoothly	Very strict
1122	35	Female	Undergraduate	Married	2	11~15	Emergency, Intensive Care Unit and Operating Room	Primary title	Very harmonious	Nurse	5000-8000	generally	Very strict
1123	27	Female	Undergraduate	Married	0	≤5	Surgical	Primary title	generally	Nurse	5000-8000	generally	Strict
1124	41	Female	Undergraduate	Married	1	＞15	Pediatrics	Intermediate title	Very harmonious	Nurse	5000-8000	generally	Strict
1125	36	Female	Undergraduate	Married	1	11~15	Surgical	Intermediate title	Very harmonious	Head nurse	>8000	Not smooth	Very strict
1126	31	Female	Undergraduate	Married	1	6~10	Surgical	Primary title	Very harmonious	Nurse	5000-8000	generally	Very strict
1127	26	Female	Undergraduate	Married	0	≤5	Surgical	Primary title	generally	Nurse	5000-8000	Not smooth	Strict
1128	40	Female	Undergraduate	Married	2	＞15	Outpatient and other	Intermediate title	Very harmonious	Head nurse	5000-8000	smoothly	Very strict
1129	40	Female	Undergraduate	Married	2	11~15	Internal Medicine	Intermediate title	Harmonious	Nurse	5000-8000	generally	Very strict
1130	26	Female	Undergraduate	Single	0	≤5	Internal Medicine	Primary title	Harmonious	Nurse	>8000	smoothly	Strict
1131	41	Female	Undergraduate	Married	1	＞15	Surgical	Intermediate title	Very harmonious	Nurse	＜5000	generally	Very strict
1132	36	Female	Undergraduate	Married	2	＞15	Pediatrics	Intermediate title	Harmonious	Nurse	5000-8000	smoothly	Strict
1134	38	Female	Undergraduate	Married	2	＞15	Outpatient and other	Intermediate title	Very harmonious	Head nurse	5000-8000	generally	Very strict
1135	32	Female	Undergraduate	Married	1	11~15	Emergency, Intensive Care Unit and Operating Room	Intermediate title	Very harmonious	Nurse	5000-8000	Not smooth	Very strict
1136	36	Female	Undergraduate	Married	1	＞15	Emergency, Intensive Care Unit and Operating Room	Intermediate title	Very harmonious	Head nurse	>8000	smoothly	Very strict
1137	36	Female	Undergraduate	Married	>2个	11~15	Pediatrics	Primary title	Harmonious	Nurse	5000-8000	Not smooth	Very strict
1138	26	Female	Undergraduate	Single	0	≤5	Surgical	Primary title	Very harmonious	Nurse	5000-8000	smoothly	Strict
1139	39	Female	Undergraduate	Married	2	11~15	Internal Medicine	Intermediate title	Very harmonious	Head nurse	5000-8000	smoothly	Strict
1140	35	Female	Undergraduate	Married	2	11~15	Pediatrics	Intermediate title	Very harmonious	Nurse	5000-8000	smoothly	Very strict
1141	31	Female	Undergraduate	Married	0	6~10	Pediatrics	Primary title	Harmonious	Nurse	＜5000	generally	Strict
1142	41	Female	Undergraduate	Married	1	11~15	Pediatrics	Intermediate title	Harmonious	Head nurse	5000-8000	generally	Very strict
1144	39	Female	Undergraduate	Married	2	＞15	Obstetrics and Gynecology	Intermediate title	Very harmonious	Head nurse	5000-8000	smoothly	Strict
1145	43	Female	Undergraduate	Married	1	＞15	Emergency, Intensive Care Unit and Operating Room	Senior title	Very harmonious	Head nurse	>8000	Not smooth	Very strict
1146	25	Female	Undergraduate	Single	0	≤5	Surgical	Primary title	Harmonious	Nurse	＜5000	smoothly	Strict
1147	28	Female	Undergraduate	Single	0	6~10	Surgical	Primary title	generally	Nurse	>8000	Not smooth	Very strict
1148	43	Female	Junior college	Married	1	＞15	Pediatrics	Intermediate title	Harmonious	Nurse	＜5000	generally	Very strict
1149	40	Female	Undergraduate	Married	2	＞15	Surgical	Intermediate title	Very harmonious	Nurse	5000-8000	generally	Very strict
1150	41	Female	Undergraduate	Married	2	＞15	Obstetrics and Gynecology	Intermediate title	Very harmonious	Head nurse	>8000	generally	Very strict
1151	37	Female	Undergraduate	Widowed or separated	1	11~15	Surgical	Intermediate title	Very harmonious	Nurse	5000-8000	smoothly	Very strict
1152	28	Female	Undergraduate	Single	0	≤5	Surgical	Primary title	Harmonious	Nurse	5000-8000	generally	Strict
1153	25	Female	Undergraduate	Single	0	≤5	Obstetrics and Gynecology	Primary title	Very harmonious	Nurse	5000-8000	Not smooth	Very strict
1154	26	Female	Undergraduate	Married	0	≤5	Obstetrics and Gynecology	Primary title	Harmonious	Nurse	5000-8000	Not smooth	Strict
1155	29	Female	Undergraduate	Married	0	≤5	Obstetrics and Gynecology	Primary title	Very harmonious	Nurse	5000-8000	generally	Strict
1156	30	Female	Undergraduate	Married	1	6~10	Obstetrics and Gynecology	Primary title	Very harmonious	Nurse	>8000	generally	Very strict
1157	29	Female	Undergraduate	Married	1	6~10	Obstetrics and Gynecology	Primary title	Harmonious	Nurse	5000-8000	generally	Very strict
1158	31	Female	Undergraduate	Single	0	6~10	Obstetrics and Gynecology	Intermediate title	Very harmonious	Nurse	5000-8000	smoothly	Strict
1159	38	Female	Undergraduate	Married	1	＞15	Obstetrics and Gynecology	Intermediate title	Very harmonious	Nurse	5000-8000	generally	Very strict
1160	30	Female	Undergraduate	Married	2	6~10	Obstetrics and Gynecology	Primary title	Very harmonious	Nurse	5000-8000	generally	Strict
1161	31	Female	Undergraduate	Married	1	6~10	Obstetrics and Gynecology	Primary title	Very harmonious	Nurse	5000-8000	generally	Very strict
1162	40	Female	Undergraduate	Married	2	＞15	Obstetrics and Gynecology	Intermediate title	Harmonious	Nurse	>8000	Not smooth	Strict
1163	41	Female	Undergraduate	Married	2	＞15	Obstetrics and Gynecology	Intermediate title	Very harmonious	Nurse	5000-8000	smoothly	Very strict
1165	39	Female	Undergraduate	Married	1	11~15	Obstetrics and Gynecology	Primary title	Very harmonious	Nurse	5000-8000	generally	Very strict
1166	30	Female	Undergraduate	Married	1	≤5	Obstetrics and Gynecology	Primary title	Very harmonious	Nurse	5000-8000	smoothly	Very strict
1167	54	Female	Junior college	Married	1	＞15	Obstetrics and Gynecology	Intermediate title	Harmonious	Nurse	5000-8000	generally	Strict
1169	26	Female	Undergraduate	Married	0	≤5	Obstetrics and Gynecology	Primary title	Harmonious	Nurse	5000-8000	smoothly	Very strict
1170	32	Female	Undergraduate	Single	0	6~10	Obstetrics and Gynecology	Intermediate title	Very harmonious	Nurse	5000-8000	smoothly	Very strict
1172	37	Female	Undergraduate	Married	2	6~10	Obstetrics and Gynecology	Intermediate title	Very harmonious	Nurse	5000-8000	smoothly	Strict
1173	39	Female	Undergraduate	Married	2	＞15	Obstetrics and Gynecology	Intermediate title	Very harmonious	Nurse	>8000	smoothly	Very strict
1175	26	Female	Undergraduate	Single	0	≤5	Obstetrics and Gynecology	Primary title	Harmonious	Nurse	5000-8000	generally	Very strict
1176	37	Female	Undergraduate	Married	2	11~15	Obstetrics and Gynecology	Intermediate title	Very harmonious	Nurse	>8000	generally	Very strict
1177	33	Female	Undergraduate	Married	1	11~15	Obstetrics and Gynecology	Intermediate title	Harmonious	Nurse	>8000	Not smooth	Very strict
1178	24	Female	Undergraduate	Single	0	≤5	Internal Medicine	Primary title	Very harmonious	Nurse	5000-8000	Not smooth	Very strict
1179	37	Female	Undergraduate	Married	2	＞15	Obstetrics and Gynecology	Intermediate title	Very harmonious	Nurse	5000-8000	smoothly	Very strict
1180	27	Female	Junior college	Single	0	≤5	Obstetrics and Gynecology	Primary title	Very harmonious	Nurse	5000-8000	smoothly	Strict
1181	25	Female	Undergraduate	Single	0	≤5	Obstetrics and Gynecology	Primary title	Very harmonious	Nurse	>8000	smoothly	Very strict
1182	26	Female	Undergraduate	Single	0	≤5	Obstetrics and Gynecology	Primary title	Very harmonious	Nurse	5000-8000	smoothly	Strict
1183	32	Female	Undergraduate	Married	1	11~15	Internal Medicine	Primary title	Very harmonious	Nurse	＜5000	smoothly	Strict
1184	28	Female	Undergraduate	Single	0	≤5	Obstetrics and Gynecology	Primary title	Very harmonious	Nurse	5000-8000	smoothly	Strict
1185	46	Female	Undergraduate	Married	1	＞15	Outpatient and other	Senior title	Harmonious	Head nurse	>8000	smoothly	Strict
1186	32	Female	Undergraduate	Married	1	11~15	Outpatient and other	Intermediate title	Harmonious	Nurse	＜5000	Not smooth	Strict
1187	33	Male	Undergraduate	Married	2	11~15	Emergency, Intensive Care Unit and Operating Room	Primary title	Very harmonious	Nurse	5000-8000	generally	Very strict
1188	39	Female	Undergraduate	Married	2	＞15	Surgical	Intermediate title	Very harmonious	Head nurse	5000-8000	generally	Strict
1189	30	Female	Undergraduate	Single	0	≤5	Obstetrics and Gynecology	Primary title	Harmonious	Nurse	＜5000	smoothly	Very strict
1190	36	Female	Undergraduate	Married	0	11~15	Emergency, Intensive Care Unit and Operating Room	Intermediate title	Very harmonious	Nurse	5000-8000	generally	Strict
1191	26	Female	Undergraduate	Single	0	≤5	Emergency, Intensive Care Unit and Operating Room	Primary title	generally	Nurse	＜5000	Not smooth	Very strict
1192	25	Male	Undergraduate	Single	0	≤5	Emergency, Intensive Care Unit and Operating Room	Primary title	Very harmonious	Nurse	5000-8000	smoothly	Strict
1193	29	Female	Undergraduate	Married	0	6~10	Surgical	Primary title	Harmonious	Nurse	＜5000	generally	Strict
1194	38	Female	Undergraduate	Married	2	＞15	Emergency, Intensive Care Unit and Operating Room	Intermediate title	Very harmonious	Head nurse	>8000	generally	Very strict
1195	40	Female	Undergraduate	Married	1	＞15	Surgical	Primary title	generally	Nurse	＜5000	generally	Strict
1196	36	Female	Undergraduate	Married	1	11~15	Obstetrics and Gynecology	Intermediate title	generally	Nurse	＜5000	smoothly	Strict
1198	31	Female	Undergraduate	Married	1	6~10	Emergency, Intensive Care Unit and Operating Room	Primary title	Harmonious	Nurse	＜5000	generally	Strict
1201	39	Female	Undergraduate	Married	1	＞15	Emergency, Intensive Care Unit and Operating Room	Primary title	Very harmonious	Head nurse	5000-8000	smoothly	Strict
1203	23	Female	Junior college	Single	0	≤5	Obstetrics and Gynecology	Primary title	Very harmonious	Nurse	＜5000	smoothly	Very strict
1204	27	Female	Undergraduate	Married	1	≤5	Emergency, Intensive Care Unit and Operating Room	Primary title	Very harmonious	Nurse	5000-8000	smoothly	Strict
1205	29	Female	Junior college	Married	1	6~10	Surgical	Primary title	Harmonious	Nurse	＜5000	smoothly	Strict
1206	35	Female	Undergraduate	Single	0	＞15	Surgical	Intermediate title	Harmonious	Nurse	＜5000	generally	Strict
1207	30	Female	Undergraduate	Married	1	6~10	Outpatient and other	Primary title	Harmonious	Nurse	＜5000	smoothly	Very strict
1208	42	Female	Undergraduate	Married	1	＞15	Surgical	Intermediate title	Harmonious	Nurse	＜5000	generally	Strict
1209	33	Female	Undergraduate	Married	1	11~15	Outpatient and other	Intermediate title	Harmonious	Nurse	5000-8000	generally	Strict
1210	29	Male	Junior college	Married	1	6~10	Emergency, Intensive Care Unit and Operating Room	Primary title	generally	Nurse	＜5000	generally	Strict
1211	33	Female	Undergraduate	Married	1	11~15	Surgical	Intermediate title	Harmonious	Nurse	5000-8000	Not smooth	Very strict
1212	51	Female	Undergraduate	Married	1	＞15	Outpatient and other	Intermediate title	Harmonious	Nurse	＜5000	smoothly	generally
1213	41	Female	Undergraduate	Married	1	＞15	Outpatient and other	Primary title	Harmonious	Nurse	5000-8000	generally	Strict
1214	30	Female	Undergraduate	Married	2	6~10	Outpatient and other	Primary title	Harmonious	Nurse	＜5000	generally	Strict
1215	35	Female	Undergraduate	Married	2	11~15	Emergency, Intensive Care Unit and Operating Room	Primary title	Very harmonious	Nurse	5000-8000	Not smooth	Very strict
1216	29	Female	Undergraduate	Single	0	≤5	Emergency, Intensive Care Unit and Operating Room	Primary title	generally	Nurse	5000-8000	generally	Strict
1217	31	Female	Undergraduate	Married	0	6~10	Surgical	Primary title	Harmonious	Nurse	＜5000	generally	Very strict
1219	26	Female	Undergraduate	Married	1	≤5	Emergency, Intensive Care Unit and Operating Room	Primary title	Very harmonious	Nurse	＜5000	smoothly	Very strict
1220	33	Female	Junior college	Married	1	11~15	Outpatient and other	Primary title	Very harmonious	Nurse	＜5000	smoothly	Very strict
1221	33	Female	Undergraduate	Married	1	6~10	Emergency, Intensive Care Unit and Operating Room	Primary title	Very harmonious	Nurse	5000-8000	Not smooth	Strict
1222	25	Female	Undergraduate	Single	0	≤5	Emergency, Intensive Care Unit and Operating Room	Primary title	generally	Nurse	＜5000	generally	Strict
1223	27	Female	Undergraduate	Married	0	6~10	Emergency, Intensive Care Unit and Operating Room	Primary title	Very harmonious	Nurse	＜5000	smoothly	Strict
1224	29	Female	Undergraduate	Married	0	6~10	Surgical	Primary title	Harmonious	Nurse	5000-8000	generally	Strict
1225	37	Female	Junior college	Single	0	＞15	Outpatient and other	Primary title	Very harmonious	Nurse	＜5000	Not smooth	Strict
1227	27	Female	Undergraduate	Single	0	≤5	Emergency, Intensive Care Unit and Operating Room	Primary title	Harmonious	Nurse	＜5000	generally	Very strict
1228	30	Female	Undergraduate	Married	0	6~10	Emergency, Intensive Care Unit and Operating Room	Primary title	generally	Nurse	＜5000	generally	Very strict
1229	28	Female	Undergraduate	Single	0	≤5	Surgical	Primary title	generally	Nurse	＜5000	generally	Very strict
1230	37	Female	Junior college	Married	1	11~15	Outpatient and other	Intermediate title	Harmonious	Nurse	＜5000	generally	Very strict
1231	23	Female	Undergraduate	Single	0	≤5	Obstetrics and Gynecology	Primary title	Very harmonious	Nurse	＜5000	smoothly	Very strict
1232	34	Female	Undergraduate	Married	2	11~15	Outpatient and other	Primary title	Harmonious	Nurse	＜5000	smoothly	Strict
1233	33	Female	Undergraduate	Married	1	11~15	Internal Medicine	Primary title	Very harmonious	Nurse	＜5000	Not smooth	Very strict
1234	28	Female	Undergraduate	Single	0	6~10	Surgical	Primary title	Harmonious	Nurse	＜5000	smoothly	Strict
1235	33	Female	Junior college	Married	2	11~15	Outpatient and other	Primary title	Harmonious	Nurse	＜5000	generally	Very strict
1236	28	Female	Undergraduate	Married	1	6~10	Surgical	Primary title	Harmonious	Nurse	＜5000	generally	generally
1237	46	Female	Undergraduate	Married	1	＞15	Outpatient and other	Intermediate title	Very harmonious	Nurse	＜5000	generally	Strict
1238	28	Male	Junior college	Married	0	≤5	Emergency, Intensive Care Unit and Operating Room	Primary title	Harmonious	Nurse	5000-8000	generally	Very strict
1239	37	Female	Junior college	Married	1	＞15	Surgical	Intermediate title	Harmonious	Head nurse	5000-8000	smoothly	Very strict
1241	39	Female	Undergraduate	Married	2	＞15	Emergency, Intensive Care Unit and Operating Room	Senior title	Very harmonious	Head nurse	＜5000	smoothly	generally
1242	35	Female	Undergraduate	Married	2	11~15	Surgical	Intermediate title	Harmonious	Nurse	5000-8000	generally	Strict
1244	28	Female	Undergraduate	Single	0	≤5	Outpatient and other	Primary title	Very harmonious	Nurse	＜5000	generally	Strict
1248	40	Female	Undergraduate	Married	2	＞15	Outpatient and other	Intermediate title	Very harmonious	Nurse	＜5000	smoothly	Very strict
1249	34	Female	Undergraduate	Single	0	11~15	Surgical	Intermediate title	Harmonious	Nurse	5000-8000	smoothly	Strict
1250	36	Female	Undergraduate	Married	2	11~15	Outpatient and other	Intermediate title	Very harmonious	Nurse	＜5000	generally	Very strict
1251	28	Female	Undergraduate	Single	0	6~10	Emergency, Intensive Care Unit and Operating Room	Primary title	Very harmonious	Nurse	＜5000	Not smooth	Strict
1252	35	Male	Junior college	Single	0	11~15	Emergency, Intensive Care Unit and Operating Room	Intermediate title	Very harmonious	Nurse	5000-8000	smoothly	generally
1254	26	Female	Undergraduate	Single	0	≤5	Emergency, Intensive Care Unit and Operating Room	Primary title	Very harmonious	Nurse	＜5000	smoothly	Strict
1255	38	Female	Undergraduate	Married	1	＞15	Outpatient and other	Intermediate title	Harmonious	Nurse	＜5000	smoothly	Strict
1256	25	Female	Undergraduate	Single	0	≤5	Emergency, Intensive Care Unit and Operating Room	Primary title	Very harmonious	Nurse	＜5000	smoothly	Very strict
1257	35	Female	Undergraduate	Married	1	6~10	Emergency, Intensive Care Unit and Operating Room	Primary title	Very harmonious	Nurse	＜5000	generally	Very strict
1258	34	Female	Undergraduate	Single	0	11~15	Surgical	Intermediate title	Very harmonious	Nurse	5000-8000	generally	Strict
1259	30	Male	Undergraduate	Married	1	6~10	Emergency, Intensive Care Unit and Operating Room	Primary title	generally	Nurse	＜5000	Not smooth	Strict
1260	34	Female	Undergraduate	Married	1	11~15	Surgical	Intermediate title	Very harmonious	Nurse	＜5000	generally	Strict
1261	31	Female	Undergraduate	Single	0	6~10	Surgical	Primary title	Harmonious	Nurse	＜5000	generally	Strict
1262	45	Female	Undergraduate	Married	2	＞15	Outpatient and other	Senior title	Very harmonious	Nurse	5000-8000	generally	Strict
1263	40	Male	Junior college	Married	2	＞15	Emergency, Intensive Care Unit and Operating Room	Primary title	Harmonious	Nurse	＜5000	Not smooth	generally
1264	28	Female	Undergraduate	Single	0	6~10	Emergency, Intensive Care Unit and Operating Room	Primary title	Harmonious	Nurse	＜5000	generally	Strict
1265	30	Female	Undergraduate	Married	2	6~10	Surgical	Intermediate title	Harmonious	Nurse	5000-8000	generally	Strict
1267	28	Female	Undergraduate	Married	1	6~10	Emergency, Intensive Care Unit and Operating Room	Primary title	generally	Nurse	5000-8000	Not smooth	Strict
1268	34	Female	Undergraduate	Married	2	11~15	Emergency, Intensive Care Unit and Operating Room	Intermediate title	generally	Nurse	5000-8000	generally	Strict
1269	29	Female	Undergraduate	Married	0	≤5	Emergency, Intensive Care Unit and Operating Room	Primary title	Very harmonious	Nurse	＜5000	smoothly	Strict
1270	29	Female	Undergraduate	Married	2	6~10	Emergency, Intensive Care Unit and Operating Room	Primary title	Harmonious	Nurse	5000-8000	generally	Very strict
1271	42	Female	Junior college	Married	>2个	＞15	Emergency, Intensive Care Unit and Operating Room	Intermediate title	Very harmonious	Nurse	5000-8000	generally	Strict
1272	30	Male	Undergraduate	Single	2	6~10	Emergency, Intensive Care Unit and Operating Room	Primary title	generally	Nurse	＜5000	generally	Very strict
1275	32	Female	Undergraduate	Married	2	6~10	Emergency, Intensive Care Unit and Operating Room	Primary title	Harmonious	Nurse	＜5000	smoothly	Strict
1276	42	Female	Junior college	Married	1	＞15	Surgical	Intermediate title	Harmonious	Nurse	＜5000	generally	Very strict
1277	35	Female	Undergraduate	Single	0	11~15	Emergency, Intensive Care Unit and Operating Room	Intermediate title	generally	Nurse	5000-8000	smoothly	Strict
1278	39	Female	Undergraduate	Married	1	11~15	Emergency, Intensive Care Unit and Operating Room	Intermediate title	Harmonious	Head nurse	5000-8000	smoothly	Strict
1279	35	Female	Undergraduate	Married	2	11~15	Outpatient and other	Intermediate title	Very harmonious	Nurse	＜5000	generally	Very strict
1280	44	Female	Undergraduate	Married	2	＞15	Outpatient and other	Intermediate title	Harmonious	Nurse	5000-8000	Not smooth	generally
1281	33	Female	Undergraduate	Married	1	11~15	Emergency, Intensive Care Unit and Operating Room	Primary title	Very harmonious	Nurse	5000-8000	smoothly	Strict
1282	39	Female	Undergraduate	Married	2	＞15	Outpatient and other	Intermediate title	Very harmonious	Nurse	＜5000	generally	Strict
1283	33	Female	Undergraduate	Married	1	6~10	Internal Medicine	Primary title	Harmonious	Nurse	＜5000	generally	Strict
1284	25	Male	Undergraduate	Single	0	≤5	Emergency, Intensive Care Unit and Operating Room	Primary title	Harmonious	Nurse	＜5000	generally	Strict
1285	36	Female	Undergraduate	Married	2	11~15	Internal Medicine	Intermediate title	Very harmonious	Head nurse	5000-8000	smoothly	generally
1286	31	Female	Undergraduate	Single	0	6~10	Surgical	Intermediate title	Very harmonious	Nurse	5000-8000	smoothly	Very strict
1287	38	Female	Undergraduate	Married	2	11~15	Outpatient and other	Primary title	Very harmonious	Nurse	＜5000	Not smooth	Very strict
1288	29	Female	Undergraduate	Married	1	6~10	Internal Medicine	Primary title	Very harmonious	Nurse	5000-8000	generally	Strict
1289	40	Female	Undergraduate	Married	1	＞15	Outpatient and other	Primary title	Harmonious	Nurse	＜5000	generally	Strict
1290	25	Female	Undergraduate	Single	0	≤5	Surgical	Primary title	Very harmonious	Nurse	5000-8000	smoothly	Very strict
1291	25	Female	Junior college	Single	0	≤5	Internal Medicine	Primary title	Harmonious	Nurse	＜5000	Not smooth	Strict
1292	45	Female	Undergraduate	Married	2	＞15	Internal Medicine	Senior title	Very harmonious	Head nurse	5000-8000	smoothly	Strict
1293	23	Female	Junior college	Single	0	≤5	Emergency, Intensive Care Unit and Operating Room	Primary title	Very harmonious	Nurse	＜5000	Not smooth	Very strict
1294	30	Female	Undergraduate	Married	1	6~10	Internal Medicine	Primary title	Harmonious	Nurse	5000-8000	generally	Strict
1295	29	Female	Undergraduate	Single	0	6~10	Internal Medicine	Primary title	Harmonious	Nurse	5000-8000	Not smooth	Strict
1296	35	Female	Undergraduate	Married	1	11~15	Surgical	Intermediate title	Harmonious	Nurse	5000-8000	smoothly	Very strict
1297	37	Female	Undergraduate	Married	2	11~15	Outpatient and other	Primary title	generally	Nurse	＜5000	Not smooth	Strict
1298	36	Female	Undergraduate	Married	2	11~15	Emergency, Intensive Care Unit and Operating Room	Intermediate title	Harmonious	Nurse	5000-8000	Not smooth	Strict
1299	34	Female	Undergraduate	Married	2	11~15	Internal Medicine	Primary title	Very harmonious	Nurse	5000-8000	smoothly	Very strict
1300	47	Female	Undergraduate	Married	1	＞15	Emergency, Intensive Care Unit and Operating Room	Senior title	Very harmonious	Head nurse	5000-8000	Not smooth	Strict
1301	33	Male	Junior college	Married	2	11~15	Emergency, Intensive Care Unit and Operating Room	Primary title	Very harmonious	Nurse	＜5000	smoothly	generally
1302	46	Female	Undergraduate	Married	2	＞15	Emergency, Intensive Care Unit and Operating Room	Senior title	Very harmonious	Head nurse	5000-8000	generally	Strict
1303	40	Female	Undergraduate	Married	2	＞15	Emergency, Intensive Care Unit and Operating Room	Intermediate title	Harmonious	Head nurse	＜5000	generally	Strict
1304	28	Female	Undergraduate	Single	0	≤5	Outpatient and other	Primary title	Very harmonious	Nurse	＜5000	smoothly	Very strict
1305	47	Female	Undergraduate	Married	1	＞15	Internal Medicine	Senior title	Very harmonious	Head nurse	5000-8000	generally	Strict
1306	35	Female	Undergraduate	Married	2	＞15	Internal Medicine	Intermediate title	Harmonious	Nurse	5000-8000	Not smooth	Strict
1307	33	Male	Undergraduate	Married	0	6~10	Emergency, Intensive Care Unit and Operating Room	Primary title	Harmonious	Nurse	＜5000	generally	Very strict
1308	28	Female	Junior college	Married	0	6~10	Internal Medicine	Primary title	Very harmonious	Nurse	＜5000	generally	Very strict
1310	33	Female	Undergraduate	Married	0	6~10	Internal Medicine	Primary title	Harmonious	Nurse	＜5000	generally	Strict
1311	28	Female	Undergraduate	Married	1	6~10	Internal Medicine	Primary title	Harmonious	Nurse	5000-8000	smoothly	Strict
1312	27	Female	Undergraduate	Married	1	6~10	Internal Medicine	Primary title	Very harmonious	Nurse	5000-8000	smoothly	Strict
1313	42	Female	Undergraduate	Married	2	＞15	Outpatient and other	Intermediate title	generally	Nurse	5000-8000	smoothly	generally
1314	26	Female	Undergraduate	Married	0	≤5	Internal Medicine	Primary title	generally	Nurse	＜5000	generally	Strict
1315	35	Female	Undergraduate	Married	1	11~15	Internal Medicine	Primary title	Very harmonious	Nurse	＜5000	Not smooth	Very strict
1316	32	Female	Undergraduate	Single	0	6~10	Internal Medicine	Primary title	Harmonious	Nurse	＜5000	Not smooth	Very strict
1317	31	Female	Junior college	Married	0	6~10	Internal Medicine	Primary title	Harmonious	Nurse	＜5000	smoothly	Strict
1319	41	Female	Undergraduate	Widowed or separated	1	＞15	Internal Medicine	Intermediate title	Harmonious	Head nurse	5000-8000	generally	Strict
1322	33	Female	Undergraduate	Married	1	11~15	Internal Medicine	Intermediate title	Very harmonious	Nurse	＜5000	generally	Very strict
1324	26	Female	Undergraduate	Single	0	≤5	Internal Medicine	Primary title	Very harmonious	Nurse	＜5000	smoothly	Very strict
1325	31	Female	Undergraduate	Married	0	11~15	Internal Medicine	Primary title	Harmonious	Nurse	5000-8000	generally	Very strict
1326	37	Female	Junior college	Married	1	11~15	Internal Medicine	Intermediate title	Harmonious	Nurse	＜5000	smoothly	Very strict
1327	33	Female	Undergraduate	Married	1	6~10	Outpatient and other	Intermediate title	Very harmonious	Nurse	＜5000	generally	generally
1328	23	Female	Undergraduate	Single	0	≤5	Internal Medicine	Primary title	Very harmonious	Nurse	＜5000	smoothly	Very strict
1330	29	Female	Undergraduate	Married	0	6~10	Internal Medicine	Primary title	Very harmonious	Nurse	5000-8000	generally	Very strict
1332	34	Female	Junior college	Single	0	6~10	Internal Medicine	Primary title	generally	Nurse	5000-8000	generally	Strict
1333	33	Female	Undergraduate	Married	1	6~10	Internal Medicine	Primary title	Harmonious	Nurse	5000-8000	generally	Strict
1334	29	Female	Undergraduate	Married	1	6~10	Emergency, Intensive Care Unit and Operating Room	Intermediate title	Harmonious	Nurse	＜5000	generally	Strict
1335	30	Female	Undergraduate	Married	1	6~10	Internal Medicine	Primary title	generally	Nurse	＜5000	Not smooth	Very strict
1336	52	Female	Undergraduate	Married	1	＞15	Emergency, Intensive Care Unit and Operating Room	Intermediate title	Very harmonious	Head nurse	5000-8000	generally	Strict
1337	30	Female	Undergraduate	Single	0	6~10	Internal Medicine	Primary title	Very harmonious	Nurse	5000-8000	smoothly	Very strict
1338	30	Female	Undergraduate	Married	1	6~10	Internal Medicine	Primary title	Harmonious	Nurse	＜5000	generally	Very strict
1339	30	Female	Undergraduate	Married	1	6~10	Outpatient and other	Primary title	Harmonious	Nurse	＜5000	generally	generally
1340	26	Male	Junior college	Widowed or separated	1	≤5	Emergency, Intensive Care Unit and Operating Room	Primary title	Disharmonious	Nurse	＜5000	generally	generally
1341	45	Female	Undergraduate	Married	1	＞15	Emergency, Intensive Care Unit and Operating Room	Intermediate title	Harmonious	Nurse	＜5000	generally	Strict
1342	27	Female	Undergraduate	Single	0	6~10	Internal Medicine	Primary title	Very harmonious	Nurse	5000-8000	Not smooth	Very strict
1345	31	Female	Undergraduate	Single	0	6~10	Surgical	Primary title	Harmonious	Nurse	5000-8000	smoothly	Very strict
1346	33	Female	Undergraduate	Married	2	6~10	Internal Medicine	Primary title	Very harmonious	Nurse	5000-8000	smoothly	Very strict
1347	35	Female	Undergraduate	Married	1	11~15	Emergency, Intensive Care Unit and Operating Room	Intermediate title	Very harmonious	Nurse	＜5000	smoothly	Strict
1348	30	Female	Junior college	Single	0	≤5	Internal Medicine	Primary title	Harmonious	Nurse	＜5000	smoothly	Strict
1350	37	Female	Undergraduate	Married	1	6~10	Surgical	Intermediate title	Very harmonious	Nurse	5000-8000	Not smooth	Very strict
1351	39	Female	Undergraduate	Married	2	＞15	Outpatient and other	Intermediate title	Very harmonious	Head nurse	＜5000	smoothly	Strict
1352	47	Female	Undergraduate	Married	1	＞15	Internal Medicine	Intermediate title	generally	Nurse	＜5000	generally	Very strict
1353	39	Female	Undergraduate	Married	2	＞15	Internal Medicine	Intermediate title	Harmonious	Nurse	＜5000	generally	Strict
1354	32	Female	Undergraduate	Married	2	6~10	Surgical	Primary title	Very harmonious	Nurse	＜5000	smoothly	Strict
1355	30	Female	Undergraduate	Married	1	6~10	Internal Medicine	Primary title	Harmonious	Nurse	＜5000	Not smooth	generally
1356	31	Female	Undergraduate	Single	0	6~10	Surgical	Primary title	generally	Nurse	＜5000	generally	Strict
1357	41	Female	Undergraduate	Married	2	＞15	Surgical	Intermediate title	Harmonious	Nurse	＜5000	Not smooth	Very strict
1358	29	Female	Undergraduate	Single	0	≤5	Outpatient and other	Primary title	Very harmonious	Nurse	5000-8000	smoothly	Very strict
1359	36	Female	Undergraduate	Married	1	11~15	Surgical	Primary title	Very harmonious	Nurse	5000-8000	generally	Very strict
1361	30	Female	Junior college	Married	2	6~10	Surgical	Primary title	generally	Nurse	＜5000	generally	generally
1362	34	Female	Undergraduate	Married	1	11~15	Surgical	Intermediate title	Very harmonious	Nurse	>8000	Not smooth	Very strict
1364	35	Female	Undergraduate	Married	1	11~15	Outpatient and other	Intermediate title	generally	Nurse	＜5000	generally	Very strict
1365	40	Female	Undergraduate	Married	1	＞15	Surgical	Intermediate title	Very harmonious	Head nurse	5000-8000	generally	Very strict
1366	30	Female	Undergraduate	Married	0	6~10	Internal Medicine	Primary title	Harmonious	Nurse	＜5000	generally	Very strict
1367	29	Female	Undergraduate	Married	0	6~10	Internal Medicine	Primary title	generally	Nurse	5000-8000	generally	Strict
1368	23	Female	Undergraduate	Single	0	≤5	Obstetrics and Gynecology	Primary title	Very harmonious	Nurse	＜5000	generally	Very strict
1370	29	Female	Junior college	Single	0	6~10	Emergency, Intensive Care Unit and Operating Room	Primary title	Harmonious	Nurse	＜5000	generally	Strict
1371	29	Female	Undergraduate	Married	0	6~10	Internal Medicine	Primary title	Very harmonious	Nurse	5000-8000	smoothly	Very strict
1372	28	Female	Undergraduate	Single	0	≤5	Surgical	Primary title	Harmonious	Nurse	＜5000	Not smooth	Very strict
1373	41	Female	Master degree or above	Married	2	＞15	Internal Medicine	Primary title	Harmonious	Nurse	＜5000	smoothly	Very strict
1374	41	Female	Undergraduate	Married	1	11~15	Outpatient and other	Intermediate title	Harmonious	Nurse	＜5000	Not smooth	generally
1375	36	Female	Undergraduate	Married	1	＞15	Surgical	Intermediate title	Harmonious	Nurse	＜5000	generally	Very strict
1376	38	Female	Undergraduate	Married	2	＞15	Emergency, Intensive Care Unit and Operating Room	Intermediate title	Disharmonious	Nurse	5000-8000	Not smooth	Very strict
1377	53	Female	Junior college	Married	1	＞15	Outpatient and other	Primary title	Very harmonious	Nurse	5000-8000	generally	Very strict
1378	35	Female	Undergraduate	Married	1	11~15	Outpatient and other	Primary title	generally	Nurse	＜5000	smoothly	generally
1379	37	Female	Undergraduate	Married	2	11~15	Internal Medicine	Intermediate title	Harmonious	Nurse	＜5000	generally	Strict
1380	36	Female	Undergraduate	Married	2	11~15	Outpatient and other	Intermediate title	Harmonious	Nurse	5000-8000	smoothly	Strict
1381	36	Female	Undergraduate	Married	1	11~15	Emergency, Intensive Care Unit and Operating Room	Intermediate title	generally	Nurse	＜5000	Not smooth	Strict
1382	41	Female	Junior college	Married	1	＞15	Outpatient and other	Intermediate title	generally	Nurse	＜5000	generally	Strict
1384	30	Female	Undergraduate	Married	1	6~10	Surgical	Primary title	Very harmonious	Nurse	5000-8000	smoothly	Strict
1385	36	Female	Junior college	Married	1	11~15	Outpatient and other	Intermediate title	Harmonious	Nurse	＜5000	generally	Strict
1386	52	Female	Junior college	Married	1	＞15	Outpatient and other	Intermediate title	Harmonious	Nurse	5000-8000	generally	generally
1387	45	Female	Undergraduate	Married	1	＞15	Internal Medicine	Senior title	Very harmonious	Head nurse	5000-8000	smoothly	Very strict
1388	41	Female	Undergraduate	Married	1	＞15	Surgical	Intermediate title	generally	Nurse	＜5000	Not smooth	Strict
1389	35	Female	Undergraduate	Married	2	＞15	Emergency, Intensive Care Unit and Operating Room	Intermediate title	Very harmonious	Nurse	＜5000	Not smooth	Very strict
1390	32	Female	Undergraduate	Married	1	6~10	Emergency, Intensive Care Unit and Operating Room	Intermediate title	generally	Nurse	＜5000	Not smooth	Strict
1391	54	Female	Junior college	Married	1	＞15	Outpatient and other	Intermediate title	Harmonious	Nurse	5000-8000	generally	Strict
1393	30	Female	Junior college	Single	0	6~10	Outpatient and other	Primary title	Very harmonious	Nurse	＜5000	generally	generally
1395	31	Female	Undergraduate	Married	1	11~15	Emergency, Intensive Care Unit and Operating Room	Primary title	Harmonious	Nurse	＜5000	generally	Strict
1396	39	Female	Undergraduate	Married	1	＞15	Outpatient and other	Intermediate title	Harmonious	Nurse	＜5000	smoothly	Very strict
1397	30	Female	Junior college	Single	0	6~10	Emergency, Intensive Care Unit and Operating Room	Primary title	Harmonious	Nurse	＜5000	generally	Strict
1398	35	Female	Undergraduate	Single	0	11~15	Emergency, Intensive Care Unit and Operating Room	Intermediate title	Very harmonious	Nurse	5000-8000	Not smooth	Strict
1399	37	Female	Undergraduate	Married	2	11~15	Internal Medicine	Intermediate title	Very harmonious	Nurse	＜5000	Not smooth	Very strict
1400	30	Female	Undergraduate	Married	1	6~10	Internal Medicine	Primary title	Very harmonious	Nurse	5000-8000	generally	Strict
1401	30	Female	Undergraduate	Single	0	≤5	Internal Medicine	Primary title	Harmonious	Nurse	5000-8000	generally	Strict
1403	32	Female	Undergraduate	Single	0	6~10	Internal Medicine	Primary title	generally	Nurse	＜5000	generally	Strict
1404	36	Female	Undergraduate	Married	1	11~15	Emergency, Intensive Care Unit and Operating Room	Intermediate title	Very harmonious	Nurse	5000-8000	smoothly	Strict
1405	33	Female	Undergraduate	Married	1	11~15	Emergency, Intensive Care Unit and Operating Room	Primary title	Very harmonious	Nurse	＜5000	generally	Very strict
1406	38	Female	Undergraduate	Married	1	＞15	Emergency, Intensive Care Unit and Operating Room	Intermediate title	Harmonious	Nurse	＜5000	Not smooth	generally
1407	36	Female	Junior college	Married	1	11~15	Emergency, Intensive Care Unit and Operating Room	Intermediate title	Very harmonious	Nurse	＜5000	smoothly	Strict
1409	43	Female	Undergraduate	Married	1	＞15	Outpatient and other	Intermediate title	Harmonious	Head nurse	＜5000	generally	generally
1410	38	Female	Undergraduate	Married	1	＞15	Outpatient and other	Intermediate title	Very harmonious	Nurse	5000-8000	generally	Strict
1411	36	Female	Undergraduate	Married	1	＞15	Emergency, Intensive Care Unit and Operating Room	Primary title	generally	Nurse	＜5000	generally	Very strict
1412	31	Female	Undergraduate	Married	0	6~10	Outpatient and other	Intermediate title	generally	Nurse	＜5000	Not smooth	generally
1413	36	Female	Undergraduate	Married	1	11~15	Emergency, Intensive Care Unit and Operating Room	Intermediate title	Harmonious	Nurse	5000-8000	smoothly	Strict
1414	26	Male	Undergraduate	Single	0	≤5	Emergency, Intensive Care Unit and Operating Room	Primary title	Very harmonious	Nurse	＜5000	generally	Very strict
1415	36	Female	Undergraduate	Married	1	11~15	Outpatient and other	Primary title	Very harmonious	Nurse	5000-8000	smoothly	Very strict
1416	33	Female	Junior college	Married	0	6~10	Outpatient and other	Primary title	Very harmonious	Nurse	＜5000	generally	Very strict
1417	40	Female	Undergraduate	Married	0	＞15	Outpatient and other	Primary title	Very harmonious	Nurse	5000-8000	smoothly	Very strict
1418	34	Female	Junior college	Married	1	6~10	Outpatient and other	Primary title	Very harmonious	Nurse	5000-8000	Not smooth	Very strict
1419	28	Female	Undergraduate	Single	0	6~10	Surgical	Primary title	generally	Nurse	＜5000	generally	Strict
1420	25	Female	Undergraduate	Married	1	6~10	Internal Medicine	Primary title	Harmonious	Nurse	5000-8000	Not smooth	Strict
1423	33	Female	Undergraduate	Married	2	11~15	Emergency, Intensive Care Unit and Operating Room	Intermediate title	Very harmonious	Nurse	5000-8000	smoothly	Strict
1424	36	Female	Undergraduate	Married	0	11~15	Outpatient and other	Intermediate title	Harmonious	Nurse	＜5000	smoothly	Strict
1425	24	Female	Undergraduate	Single	0	≤5	Internal Medicine	Primary title	Very harmonious	Nurse	＜5000	generally	Very strict
1426	54	Female	Junior college	Married	1	＞15	Outpatient and other	Intermediate title	Disharmonious	Nurse	＜5000	smoothly	Strict
1428	28	Female	Undergraduate	Married	1	6~10	Emergency, Intensive Care Unit and Operating Room	Primary title	Harmonious	Nurse	5000-8000	smoothly	Very strict
1429	38	Female	Undergraduate	Married	2	11~15	Emergency, Intensive Care Unit and Operating Room	Intermediate title	Very harmonious	Nurse	5000-8000	smoothly	Very strict
1430	39	Female	Undergraduate	Widowed or separated	1	＞15	Outpatient and other	Intermediate title	generally	Nurse	5000-8000	Not smooth	Strict
1431	33	Female	Undergraduate	Married	1	6~10	Emergency, Intensive Care Unit and Operating Room	Primary title	Very harmonious	Nurse	＜5000	generally	generally
1432	35	Female	Undergraduate	Married	1	11~15	Pediatrics	Intermediate title	generally	Nurse	＜5000	Not smooth	Strict
1433	36	Female	Undergraduate	Married	2	＞15	Outpatient and other	Intermediate title	Harmonious	Nurse	5000-8000	Not smooth	Strict
1434	38	Female	Undergraduate	Married	1	＞15	Outpatient and other	Intermediate title	Very harmonious	Nurse	5000-8000	generally	Very strict
1435	33	Male	Undergraduate	Married	0	6~10	Internal Medicine	Intermediate title	Harmonious	Nurse	5000-8000	generally	Strict
1436	42	Female	Undergraduate	Married	2	11~15	Outpatient and other	Intermediate title	generally	Nurse	5000-8000	Not smooth	generally
1437	36	Female	Undergraduate	Married	1	11~15	Internal Medicine	Intermediate title	Very harmonious	Nurse	5000-8000	generally	Strict
1438	26	Female	Undergraduate	Single	0	≤5	Emergency, Intensive Care Unit and Operating Room	Primary title	Harmonious	Nurse	＜5000	generally	generally
1439	34	Female	Undergraduate	Married	1	11~15	Outpatient and other	Intermediate title	Harmonious	Nurse	5000-8000	generally	Strict
1440	38	Female	Undergraduate	Married	1	＞15	Outpatient and other	Intermediate title	Very harmonious	Nurse	＜5000	smoothly	Strict
1441	33	Female	Undergraduate	Married	1	11~15	Surgical	Primary title	Disharmonious	Nurse	＜5000	Not smooth	Very strict
1442	39	Female	Undergraduate	Married	1	＞15	Surgical	Intermediate title	Very harmonious	Head nurse	5000-8000	generally	Strict
1443	32	Female	Undergraduate	Married	1	6~10	Surgical	Primary title	Harmonious	Nurse	＜5000	Not smooth	Very strict
1444	29	Female	Junior college	Single	0	6~10	Outpatient and other	Primary title	Very harmonious	Nurse	＜5000	generally	Very strict
1445	32	Female	Undergraduate	Married	1	11~15	Outpatient and other	Intermediate title	Harmonious	Nurse	5000-8000	generally	Strict
1446	42	Female	Undergraduate	Married	1	＞15	Outpatient and other	Intermediate title	Harmonious	Nurse	＜5000	smoothly	Strict
1447	38	Female	Undergraduate	Married	2	＞15	Emergency, Intensive Care Unit and Operating Room	Intermediate title	Harmonious	Nurse	＜5000	generally	generally
1448	46	Female	Junior college	Married	2	＞15	Obstetrics and Gynecology	Senior title	Very harmonious	Head nurse	5000-8000	smoothly	Strict
1449	48	Female	Undergraduate	Married	1	＞15	Outpatient and other	Intermediate title	Harmonious	Nurse	＜5000	smoothly	Strict
1450	24	Female	Undergraduate	Single	0	≤5	Surgical	Primary title	Very harmonious	Nurse	＜5000	smoothly	Very strict
1452	32	Male	Undergraduate	Married	0	6~10	Surgical	Primary title	Very harmonious	Nurse	5000-8000	smoothly	Strict
1453	32	Female	Junior college	Married	2	11~15	Internal Medicine	Intermediate title	Very harmonious	Nurse	＜5000	Not smooth	Very strict
1454	29	Female	Undergraduate	Single	0	6~10	Emergency, Intensive Care Unit and Operating Room	Primary title	Harmonious	Nurse	＜5000	smoothly	Strict
1455	29	Female	Undergraduate	Single	0	≤5	Emergency, Intensive Care Unit and Operating Room	Primary title	Very harmonious	Nurse	＜5000	generally	Very strict
1457	28	Female	Undergraduate	Married	1	6~10	Internal Medicine	Primary title	Harmonious	Nurse	＜5000	smoothly	Strict
1458	45	Female	Undergraduate	Married	1	＞15	Internal Medicine	Senior title	Harmonious	Head nurse	＜5000	generally	Strict
1460	39	Female	Undergraduate	Married	1	＞15	Internal Medicine	Intermediate title	Harmonious	Head nurse	5000-8000	Not smooth	Strict
1461	33	Female	Undergraduate	Married	1	11~15	Internal Medicine	Intermediate title	Harmonious	Nurse	5000-8000	Not smooth	Very strict
1462	24	Female	Undergraduate	Single	0	≤5	Surgical	Primary title	Harmonious	Nurse	＜5000	generally	generally
1463	37	Female	Junior college	Single	0	＞15	Outpatient and other	Primary title	Very harmonious	Nurse	＜5000	smoothly	Very strict
1464	30	Female	Undergraduate	Married	0	6~10	Internal Medicine	Primary title	Very harmonious	Nurse	＜5000	generally	Strict
1465	30	Female	Undergraduate	Single	0	6~10	Surgical	Primary title	Harmonious	Nurse	＜5000	generally	Strict
1466	35	Female	Undergraduate	Married	2	6~10	Internal Medicine	Intermediate title	generally	Nurse	5000-8000	generally	Strict
1468	26	Male	Junior college	Single	0	≤5	Emergency, Intensive Care Unit and Operating Room	Primary title	generally	Nurse	＜5000	generally	Strict
1471	31	Female	Undergraduate	Married	2	6~10	Outpatient and other	Primary title	Harmonious	Nurse	＜5000	generally	Strict
1472	29	Female	Undergraduate	Single	0	≤5	Surgical	Primary title	Harmonious	Nurse	5000-8000	generally	Strict
1473	40	Female	Undergraduate	Married	2	＞15	Internal Medicine	Senior title	Harmonious	Head nurse	5000-8000	generally	Very strict
1474	35	Female	Undergraduate	Married	2	11~15	Internal Medicine	Primary title	Very harmonious	Nurse	5000-8000	Not smooth	Very strict
1475	24	Female	Undergraduate	Single	0	≤5	Emergency, Intensive Care Unit and Operating Room	Primary title	generally	Nurse	＜5000	Not smooth	Very strict
1476	30	Female	Undergraduate	Single	0	6~10	Surgical	Primary title	Very harmonious	Nurse	＜5000	generally	Strict
1477	27	Female	Undergraduate	Single	0	6~10	Internal Medicine	Primary title	Harmonious	Nurse	5000-8000	generally	Strict
1478	37	Female	Undergraduate	Married	0	11~15	Surgical	Intermediate title	Harmonious	Nurse	＜5000	generally	Strict
1480	33	Female	Undergraduate	Married	1	11~15	Internal Medicine	Intermediate title	Very harmonious	Head nurse	＜5000	smoothly	Very strict
1481	31	Female	Undergraduate	Single	0	6~10	Internal Medicine	Primary title	Very harmonious	Nurse	＜5000	generally	Very strict
1483	34	Female	Undergraduate	Single	0	6~10	Outpatient and other	Intermediate title	Very harmonious	Nurse	5000-8000	smoothly	Strict
1484	38	Female	Undergraduate	Single	0	11~15	Internal Medicine	Intermediate title	Harmonious	Nurse	5000-8000	smoothly	Strict
1485	34	Female	Junior college	Married	2	11~15	Obstetrics and Gynecology	Primary title	Very harmonious	Nurse	＜5000	generally	Very strict
1488	25	Female	Undergraduate	Single	0	≤5	Internal Medicine	Primary title	Harmonious	Nurse	＜5000	generally	Very strict
1489	30	Female	Undergraduate	Married	1	6~10	Internal Medicine	Intermediate title	generally	Nurse	＜5000	generally	Very strict
1490	53	Female	Junior college	Married	1	＞15	Surgical	Intermediate title	Harmonious	Head nurse	5000-8000	smoothly	Strict
1491	33	Female	Undergraduate	Married	2	11~15	Surgical	Intermediate title	Harmonious	Nurse	5000-8000	smoothly	Very strict
1492	34	Female	Junior college	Married	2	11~15	Internal Medicine	Intermediate title	generally	Nurse	＜5000	Not smooth	Strict
1493	33	Female	Undergraduate	Married	1	11~15	Outpatient and other	Primary title	Harmonious	Nurse	5000-8000	Not smooth	Very strict
1494	23	Female	Junior college	Single	0	≤5	Obstetrics and Gynecology	Primary title	generally	Nurse	＜5000	generally	Very strict
1495	35	Female	Junior college	Married	2	11~15	Pediatrics	Intermediate title	generally	Nurse	＜5000	Not smooth	Strict
1496	33	Female	Undergraduate	Married	1	11~15	Internal Medicine	Intermediate title	Very harmonious	Nurse	5000-8000	generally	Strict
1497	31	Female	Undergraduate	Married	1	6~10	Internal Medicine	Primary title	Very harmonious	Nurse	5000-8000	generally	Very strict
1498	33	Female	Undergraduate	Married	2	≤5	Internal Medicine	Intermediate title	Very harmonious	Nurse	＜5000	generally	Very strict
1499	30	Female	Undergraduate	Married	1	6~10	Internal Medicine	Primary title	Very harmonious	Nurse	5000-8000	Not smooth	Very strict
1500	40	Female	Undergraduate	Married	2	＞15	Internal Medicine	Intermediate title	Very harmonious	Head nurse	5000-8000	smoothly	Strict
1502	34	Female	Undergraduate	Married	1	6~10	Surgical	Primary title	Harmonious	Nurse	＜5000	generally	Strict
1503	32	Female	Undergraduate	Married	1	6~10	Emergency, Intensive Care Unit and Operating Room	Intermediate title	generally	Nurse	＜5000	generally	generally
1504	28	Female	Undergraduate	Single	0	6~10	Internal Medicine	Primary title	Very harmonious	Nurse	5000-8000	smoothly	Strict
1505	27	Female	Undergraduate	Single	0	≤5	Internal Medicine	Primary title	generally	Nurse	＜5000	Not smooth	Strict
1506	31	Female	Undergraduate	Married	2	6~10	Surgical	Primary title	Very harmonious	Nurse	5000-8000	smoothly	Strict
1507	28	Female	Undergraduate	Married	1	6~10	Surgical	Primary title	Harmonious	Nurse	＜5000	generally	Strict
1509	30	Female	Undergraduate	Married	1	6~10	Emergency, Intensive Care Unit and Operating Room	Intermediate title	Very harmonious	Nurse	＜5000	generally	Strict
1510	32	Female	Undergraduate	Single	0	6~10	Internal Medicine	Primary title	Very harmonious	Nurse	5000-8000	generally	Very strict
1511	33	Female	Undergraduate	Married	2	6~10	Surgical	Primary title	Very harmonious	Nurse	＜5000	smoothly	Very strict
1512	27	Female	Undergraduate	Married	1	6~10	Outpatient and other	Primary title	Harmonious	Nurse	＜5000	generally	Very strict
1513	30	Female	Undergraduate	Married	1	11~15	Internal Medicine	Intermediate title	Very harmonious	Nurse	＜5000	generally	Strict
1514	36	Female	Undergraduate	Married	2	＞15	Surgical	Intermediate title	Very harmonious	Nurse	＜5000	generally	Very strict
1515	36	Male	Undergraduate	Single	0	11~15	Internal Medicine	Primary title	Very harmonious	Nurse	5000-8000	generally	Strict
1516	36	Female	Undergraduate	Married	1	11~15	Pediatrics	Intermediate title	generally	Nurse	＜5000	Not smooth	generally
1518	33	Female	Undergraduate	Married	1	11~15	Internal Medicine	Intermediate title	Very harmonious	Nurse	5000-8000	smoothly	Strict
1519	30	Female	Undergraduate	Married	0	6~10	Pediatrics	Primary title	Harmonious	Nurse	＜5000	smoothly	Very strict
1520	26	Female	Junior college	Married	0	≤5	Emergency, Intensive Care Unit and Operating Room	Primary title	Very harmonious	Nurse	＜5000	generally	Strict
1521	33	Female	Undergraduate	Single	0	6~10	Surgical	Primary title	Harmonious	Nurse	＜5000	generally	Strict
1523	36	Female	Undergraduate	Married	2	11~15	Obstetrics and Gynecology	Intermediate title	Very harmonious	Nurse	5000-8000	smoothly	Very strict
1524	36	Female	Undergraduate	Married	1	11~15	Obstetrics and Gynecology	Intermediate title	generally	Nurse	＜5000	generally	Very strict
1525	30	Female	Undergraduate	Single	0	6~10	Internal Medicine	Primary title	Very harmonious	Nurse	5000-8000	generally	Very strict
1527	35	Female	Undergraduate	Married	1	11~15	Obstetrics and Gynecology	Intermediate title	Harmonious	Nurse	＜5000	Not smooth	Strict
1529	30	Female	Junior college	Married	1	6~10	Outpatient and other	Primary title	Very harmonious	Nurse	＜5000	generally	Strict
1530	27	Female	Undergraduate	Single	0	≤5	Obstetrics and Gynecology	Primary title	Harmonious	Nurse	＜5000	smoothly	Strict
1531	33	Female	Undergraduate	Married	1	11~15	Internal Medicine	Intermediate title	Very harmonious	Nurse	＜5000	Not smooth	Strict
1532	30	Female	Undergraduate	Married	1	6~10	Obstetrics and Gynecology	Primary title	generally	Nurse	＜5000	smoothly	Strict
1533	34	Female	Undergraduate	Married	2	11~15	Outpatient and other	Primary title	Very harmonious	Nurse	＜5000	generally	Strict
1534	35	Female	Undergraduate	Married	1	11~15	Internal Medicine	Intermediate title	Very harmonious	Nurse	＜5000	generally	Very strict
1535	54	Female	Junior college	Married	1	＞15	Emergency, Intensive Care Unit and Operating Room	Intermediate title	Harmonious	Nurse	5000-8000	generally	Strict
1536	30	Female	Undergraduate	Single	0	≤5	Obstetrics and Gynecology	Primary title	Harmonious	Nurse	＜5000	smoothly	Very strict
1537	29	Female	Undergraduate	Married	1	6~10	Internal Medicine	Primary title	Very harmonious	Nurse	5000-8000	generally	Strict
1538	34	Female	Undergraduate	Married	2	11~15	Outpatient and other	Intermediate title	Very harmonious	Nurse	5000-8000	generally	Strict
1540	33	Female	Undergraduate	Married	2	11~15	Internal Medicine	Primary title	Very harmonious	Nurse	5000-8000	generally	Strict
1541	48	Female	Junior college	Married	2	＞15	Internal Medicine	Intermediate title	Harmonious	Nurse	＜5000	generally	Very strict
1542	52	Female	Junior college	Married	1	＞15	Internal Medicine	Intermediate title	Very harmonious	Nurse	5000-8000	smoothly	Strict
1543	30	Female	Undergraduate	Married	1	6~10	Internal Medicine	Primary title	generally	Nurse	＜5000	Not smooth	Strict
1544	54	Female	Junior college	Married	1	＞15	Obstetrics and Gynecology	Primary title	Harmonious	Nurse	＜5000	generally	Strict
1545	26	Female	Undergraduate	Single	0	≤5	Internal Medicine	Primary title	Very harmonious	Nurse	＜5000	generally	Very strict
1546	41	Female	Undergraduate	Married	2	11~15	Internal Medicine	Intermediate title	Harmonious	Nurse	＜5000	smoothly	Strict
1547	30	Female	Undergraduate	Single	0	≤5	Internal Medicine	Primary title	generally	Nurse	＜5000	generally	Strict
1548	34	Female	Undergraduate	Married	2	11~15	Internal Medicine	Intermediate title	Very harmonious	Nurse	＜5000	smoothly	Very strict
1549	34	Female	Undergraduate	Married	0	11~15	Outpatient and other	Primary title	Very harmonious	Nurse	＜5000	generally	Very strict
1550	38	Female	Undergraduate	Married	1	＞15	Outpatient and other	Intermediate title	Very harmonious	Head nurse	＜5000	smoothly	Strict
1551	36	Female	Undergraduate	Married	2	11~15	Outpatient and other	Primary title	Very harmonious	Nurse	5000-8000	generally	Strict
1552	35	Female	Undergraduate	Married	1	11~15	Outpatient and other	Primary title	Harmonious	Nurse	＜5000	generally	Strict
1555	50	Female	Junior college	Married	1	＞15	Outpatient and other	Intermediate title	Very harmonious	Nurse	5000-8000	smoothly	Strict
1557	49	Female	Junior college	Married	2	＞15	Outpatient and other	Intermediate title	Harmonious	Nurse	5000-8000	generally	Very strict
1558	32	Female	Undergraduate	Married	2	11~15	Surgical	Primary title	Very harmonious	Nurse	＜5000	generally	Very strict
1559	34	Female	Undergraduate	Married	2	11~15	Pediatrics	Intermediate title	Harmonious	Nurse	5000-8000	Not smooth	Strict
1560	32	Female	Undergraduate	Married	0	6~10	Surgical	Intermediate title	Very harmonious	Nurse	＜5000	smoothly	Very strict
1563	45	Female	Junior college	Married	1	＞15	Emergency, Intensive Care Unit and Operating Room	Primary title	Very harmonious	Nurse	＜5000	Not smooth	Very strict
1564	35	Female	Undergraduate	Married	0	11~15	Internal Medicine	Intermediate title	Harmonious	Nurse	5000-8000	generally	Strict
1565	29	Female	Undergraduate	Married	1	6~10	Outpatient and other	Primary title	Harmonious	Nurse	＜5000	Not smooth	generally
1566	44	Male	Undergraduate	Married	2	＞15	Outpatient and other	Senior title	Very harmonious	Head nurse	5000-8000	smoothly	Strict
1568	33	Male	Undergraduate	Married	0	6~10	Outpatient and other	Primary title	generally	Nurse	5000-8000	generally	generally
1569	34	Female	Undergraduate	Married	1	11~15	Outpatient and other	Intermediate title	generally	Nurse	＜5000	Not smooth	Very strict
1570	37	Female	Junior college	Married	2	11~15	Outpatient and other	Primary title	generally	Nurse	＜5000	generally	Strict
1571	24	Female	Undergraduate	Single	0	≤5	Outpatient and other	Primary title	generally	Nurse	＜5000	generally	Strict
1572	30	Male	Junior college	Single	0	6~10	Outpatient and other	Primary title	generally	Nurse	＜5000	generally	generally
1573	24	Female	Undergraduate	Single	0	≤5	Outpatient and other	Primary title	Harmonious	Nurse	＜5000	smoothly	Strict
1574	37	Female	Undergraduate	Married	1	＞15	Outpatient and other	Primary title	Very harmonious	Nurse	5000-8000	generally	Very strict
1575	32	Male	Undergraduate	Married	1	6~10	Outpatient and other	Primary title	Harmonious	Nurse	5000-8000	generally	Strict
1576	37	Female	Junior college	Married	2	＞15	Outpatient and other	Intermediate title	Harmonious	Nurse	＜5000	Not smooth	Strict
1577	37	Female	Junior college	Married	1	＞15	Internal Medicine	Intermediate title	Very harmonious	Nurse	＜5000	smoothly	generally
1579	37	Female	Undergraduate	Married	1	＞15	Outpatient and other	Primary title	Very harmonious	Nurse	＜5000	smoothly	Strict
1580	48	Female	Undergraduate	Married	1	＞15	Emergency, Intensive Care Unit and Operating Room	Intermediate title	Harmonious	Nurse	＜5000	generally	Very strict
1581	36	Female	Junior college	Married	2	11~15	Obstetrics and Gynecology	Primary title	Harmonious	Nurse	＜5000	Not smooth	Strict
1582	41	Male	Undergraduate	Married	2	＞15	Outpatient and other	Intermediate title	Very harmonious	Nurse	5000-8000	Not smooth	Strict
1583	45	Female	Undergraduate	Married	1	＞15	Outpatient and other	Senior title	Very harmonious	Head nurse	5000-8000	smoothly	Strict
1584	36	Female	Undergraduate	Married	1	11~15	Outpatient and other	Primary title	generally	Nurse	＜5000	Not smooth	Strict
1585	34	Male	Junior college	Single	0	11~15	Emergency, Intensive Care Unit and Operating Room	Primary title	Very harmonious	Nurse	5000-8000	smoothly	Strict
1586	36	Female	Junior college	Married	1	＞15	Outpatient and other	Primary title	Very harmonious	Nurse	＜5000	generally	Very strict
1587	38	Female	Undergraduate	Married	2	＞15	Outpatient and other	Primary title	Very harmonious	Nurse	＜5000	generally	Very strict
1588	52	Female	Junior college	Married	1	＞15	Pediatrics	Primary title	Very harmonious	Nurse	5000-8000	smoothly	Very strict
1589	34	Female	Undergraduate	Married	2	11~15	Internal Medicine	Primary title	Harmonious	Nurse	＜5000	generally	Strict
1590	26	Female	Junior college	Single	0	≤5	Outpatient and other	Primary title	generally	Nurse	＜5000	smoothly	Strict
1592	30	Male	Undergraduate	Married	0	11~15	Outpatient and other	Intermediate title	generally	Nurse	＜5000	smoothly	generally
1593	32	Female	Undergraduate	Married	1	6~10	Internal Medicine	Primary title	Disharmonious	Nurse	＜5000	generally	Very strict
1594	40	Female	Undergraduate	Married	2	＞15	Internal Medicine	Intermediate title	Very harmonious	Nurse	＜5000	generally	Very strict
1595	57	Female	Undergraduate	Married	1	＞15	Outpatient and other	Senior title	Very harmonious	Nurse	5000-8000	Not smooth	generally
1596	33	Female	Undergraduate	Married	2	11~15	Internal Medicine	Intermediate title	Very harmonious	Head nurse	＜5000	smoothly	Strict
1597	29	Female	Undergraduate	Single	0	6~10	Internal Medicine	Primary title	Very harmonious	Nurse	＜5000	smoothly	Very strict
1598	38	Female	Undergraduate	Married	2	＞15	Internal Medicine	Intermediate title	Harmonious	Nurse	5000-8000	generally	Strict
1599	27	Female	Undergraduate	Married	1	6~10	Internal Medicine	Primary title	Very harmonious	Nurse	＜5000	generally	generally
1601	33	Female	Undergraduate	Widowed or separated	1	6~10	Obstetrics and Gynecology	Primary title	Harmonious	Nurse	＜5000	Not smooth	Very strict
1602	40	Female	Undergraduate	Married	2	＞15	Emergency, Intensive Care Unit and Operating Room	Intermediate title	Very harmonious	Nurse	>8000	generally	Strict
1603	30	Male	Master degree or above	Married	1	≤5	Internal Medicine	Primary title	Disharmonious	Nurse	5000-8000	generally	Strict

## Sheet: PAWS-C
S1	S2	S3	S4	S5	S6	S7	S8	loafing at work	S9	S10	S11	S12	cyber loafing
3	3	3	3	3	3	3	3	24	3	3	3	3	12
3	3	3	3	3	3	3	3	24	3	3	3	3	12
2	2	2	2	1	2	2	2	15	3	1	1	1	6
2	2	2	2	2	2	3	2	17	2	1	1	1	5
1	1	1	2	1	1	1	3	11	3	1	1	1	6
2	2	2	2	2	2	2	2	16	2	1	1	1	5
3	2	2	2	2	2	2	2	17	3	1	1	1	6
3	3	3	3	3	4	3	3	25	3	3	3	3	12
4	4	4	3	4	2	2	2	25	2	1	1	1	5
1	1	1	2	1	2	1	4	13	1	1	1	1	4
3	2	3	4	2	1	3	3	21	1	1	2	1	5
2	2	2	2	2	2	1	2	15	1	1	1	1	4
3	2	2	2	1	2	1	2	15	1	1	2	1	5
2	2	3	4	2	2	5	5	25	5	2	1	1	9
3	3	3	3	3	3	3	3	24	3	3	3	3	12
4	2	1	2	1	1	2	4	17	2	1	1	1	5
3	2	1	2	1	1	1	1	12	1	1	1	1	4
2	1	2	2	1	1	2	2	13	2	1	1	1	5
1	1	1	1	2	2	2	2	12	2	1	1	1	5
3	3	3	3	3	3	5	2	25	2	1	2	1	6
3	2	3	2	2	1	1	1	15	1	5	2	5	13
3	3	4	2	4	3	3	4	26	3	3	2	2	10
3	4	4	4	3	4	3	4	29	2	1	2	1	6
3	3	3	3	3	3	3	3	24	1	1	1	1	4
2	1	2	1	1	1	3	2	13	5	1	1	1	8
3	2	2	2	2	1	1	2	15	2	1	2	1	6
4	4	3	4	2	2	2	4	25	2	2	2	1	7
3	3	3	3	1	2	3	2	20	2	1	2	1	6
2	2	2	2	2	2	2	2	16	2	2	1	1	6
2	1	1	2	2	2	4	1	15	2	1	1	1	5
3	3	3	3	3	3	3	3	24	3	3	3	2	11
3	3	1	1	3	1	1	3	16	4	1	1	1	7
3	2	1	2	1	2	2	2	15	2	2	1	2	7
1	1	1	2	1	1	1	2	10	1	1	1	1	4
2	2	1	1	2	1	1	2	12	2	1	1	1	5
3	2	3	2	3	1	1	3	18	1	1	1	1	4
3	3	3	3	3	3	3	3	24	3	3	3	3	12
2	1	1	1	2	1	5	1	14	1	1	1	1	4
2	1	3	1	2	1	1	1	12	2	1	1	1	5
2	1	2	1	1	1	1	1	10	2	2	2	2	8
2	2	3	1	1	1	3	2	15	2	2	1	1	6
3	2	2	1	3	3	1	2	17	1	1	1	1	4
2	1	1	1	3	1	1	2	12	1	1	1	1	4
3	3	3	3	3	2	1	2	20	2	1	1	1	5
4	4	3	3	4	3	3	3	27	2	2	1	1	6
3	3	3	3	3	3	3	3	24	3	3	3	3	12
3	4	2	2	2	1	2	4	20	2	3	2	1	8
3	3	3	2	4	1	3	4	23	2	2	2	2	8
3	3	3	3	3	3	4	3	25	3	3	3	3	12
4	4	4	4	4	4	3	5	32	3	1	2	1	7
3	3	1	1	1	1	2	1	13	2	1	1	1	5
2	1	2	2	1	1	1	1	11	1	1	1	1	4
2	1	1	1	1	1	1	2	10	2	1	1	1	5
2	2	1	2	1	1	2	2	13	3	2	1	1	7
2	1	2	2	2	3	3	2	17	2	1	1	1	5
2	2	4	3	3	3	3	3	23	3	1	2	2	8
3	2	1	2	1	1	2	2	14	2	1	1	1	5
2	1	3	4	1	1	1	2	15	4	1	1	1	7
3	3	4	3	4	4	4	4	29	2	2	2	1	7
2	2	1	2	2	2	1	2	14	2	1	1	1	5
1	1	3	2	1	1	1	2	12	2	1	1	1	5
4	4	3	2	2	1	1	3	20	2	1	1	1	5
4	2	2	4	2	4	3	5	26	2	1	1	1	5
3	3	3	3	3	3	3	3	24	3	3	3	2	11
2	3	4	3	1	2	2	2	19	2	1	1	1	5
4	3	3	3	3	3	3	3	25	3	3	3	3	12
3	3	1	3	4	2	1	3	20	2	1	1	1	5
4	4	4	4	4	4	4	4	32	4	4	4	4	16
1	1	1	1	1	1	2	1	9	1	1	1	1	4
3	2	1	2	1	1	1	3	14	1	1	1	1	4
3	3	3	3	2	3	2	2	21	2	2	3	2	9
3	1	1	3	2	2	1	1	14	3	3	3	3	12
2	1	2	2	2	1	1	2	13	2	1	2	2	7
2	2	1	1	2	2	1	1	12	1	1	1	1	4
3	2	1	1	3	1	1	3	15	1	1	1	1	4
3	4	3	3	3	2	2	1	21	2	2	2	2	8
2	3	1	2	1	1	2	3	15	3	2	1	1	7
2	2	3	3	2	1	2	2	17	2	2	2	1	7
3	2	3	3	2	1	1	1	16	1	1	1	1	4
1	1	1	1	1	1	1	2	9	1	1	1	1	4
2	2	2	2	2	1	2	1	14	2	1	3	2	8
1	1	2	2	1	1	1	2	11	2	1	1	1	5
3	2	2	2	1	1	1	1	13	2	1	1	1	5
4	4	5	5	5	2	5	5	35	2	2	2	1	7
1	2	2	1	1	1	1	1	10	1	1	1	1	4
2	2	3	2	1	1	2	2	15	2	1	1	1	5
3	1	3	2	1	1	1	3	15	3	2	2	1	8
5	5	5	5	5	3	1	3	32	2	1	1	1	5
2	1	1	2	1	1	3	2	13	3	2	1	2	8
4	3	4	4	4	4	3	3	29	2	3	4	2	11
3	1	1	2	2	1	2	2	14	2	1	2	1	6
4	4	4	4	3	2	3	1	25	3	2	2	1	8
2	1	2	1	5	1	1	2	15	2	1	1	1	5
4	4	4	4	4	4	4	4	32	4	4	4	5	17
3	3	3	3	3	3	2	2	22	2	2	1	1	6
3	3	3	3	3	3	3	3	24	3	3	3	3	12
3	2	3	4	4	2	4	2	24	3	1	1	1	6
1	1	1	1	1	1	1	1	8	3	1	1	1	6
4	3	2	1	1	1	4	2	18	1	2	1	1	5
3	3	2	2	1	1	2	1	15	2	1	1	1	5
2	2	2	2	1	1	2	1	13	2	1	1	1	5
3	3	2	1	2	1	1	1	14	1	1	1	1	4
2	1	1	1	1	2	2	2	12	1	2	2	1	6
1	2	1	2	1	1	1	2	11	2	1	2	1	6
3	2	3	2	3	2	1	2	18	2	1	1	1	5
1	1	2	1	1	1	1	1	9	1	1	1	1	4
2	2	2	1	3	2	2	3	17	2	1	2	1	6
2	2	1	3	2	2	1	3	16	2	1	1	1	5
2	2	3	1	1	2	3	4	18	2	1	1	1	5
1	1	1	1	1	1	1	2	9	2	1	1	1	5
1	1	1	1	1	1	1	2	9	1	1	1	1	4
1	1	1	2	1	2	1	2	11	2	1	1	1	5
1	1	3	3	2	1	3	1	15	1	1	1	1	4
3	3	4	2	1	3	1	2	19	1	1	1	1	4
1	1	1	1	1	1	1	1	8	2	1	1	1	5
2	1	2	1	1	1	1	1	10	2	1	1	1	5
2	2	2	2	1	2	2	2	15	2	2	1	2	7
3	3	3	1	2	1	2	2	17	1	1	1	1	4
3	3	3	1	1	1	1	2	15	2	1	1	1	5
2	2	1	2	1	2	1	3	14	2	1	1	1	5
3	2	2	2	2	2	2	2	17	1	1	1	1	4
3	1	2	2	1	1	1	2	13	1	1	1	1	4
1	1	2	2	3	1	1	3	14	2	1	1	1	5
2	1	2	2	1	1	2	1	12	2	1	1	1	5
4	4	5	4	3	3	5	4	32	1	3	1	1	6
3	3	4	4	3	3	4	4	28	4	4	4	4	16
2	3	2	3	3	1	2	2	18	2	1	1	1	5
4	4	5	5	1	1	1	1	22	3	1	1	1	6
3	3	2	2	3	1	2	3	19	1	1	1	1	4
2	2	2	2	2	2	2	2	16	2	2	2	2	8
2	2	1	2	3	1	1	1	13	1	1	1	1	4
1	1	1	1	1	1	1	2	9	2	1	1	1	5
2	1	1	2	2	1	1	1	11	2	1	1	1	5
4	3	4	3	4	4	3	2	27	3	3	3	2	11
1	1	1	1	1	1	1	2	9	1	1	1	1	4
3	1	2	1	1	1	1	1	11	2	1	1	1	5
2	2	1	1	1	1	1	1	10	1	1	1	1	4
3	3	3	3	3	3	3	3	24	3	1	2	2	8
2	1	1	1	1	1	1	1	9	1	1	1	1	4
2	2	2	2	2	2	2	2	16	2	1	1	1	5
2	2	2	2	2	2	3	3	18	1	1	1	1	4
2	3	1	2	1	2	3	3	17	2	2	2	1	7
2	1	2	2	3	3	2	2	17	2	1	1	1	5
1	2	1	2	2	2	1	2	13	2	1	2	2	7
2	1	2	2	1	1	1	2	12	2	1	1	1	5
2	2	2	3	1	1	1	3	15	2	1	1	1	5
2	1	2	1	2	1	2	1	12	2	2	2	1	7
3	3	2	3	3	1	2	3	20	2	2	1	1	6
3	3	3	3	1	1	4	3	21	2	1	1	1	5
3	1	2	2	1	1	1	1	12	1	1	1	1	4
2	1	2	3	2	2	2	2	16	1	1	1	1	4
2	2	2	1	1	1	1	2	12	1	1	1	1	4
2	3	3	3	1	2	3	4	21	1	1	1	1	4
5	5	5	5	1	1	1	2	25	2	1	2	1	6
3	3	1	2	1	1	1	3	15	2	1	1	1	5
3	3	3	3	3	3	3	3	24	3	3	3	3	12
4	4	2	1	1	2	4	4	22	2	1	1	1	5
2	2	2	3	1	1	1	2	14	1	1	1	1	4
4	3	3	3	2	1	3	4	23	3	2	2	2	9
2	2	1	1	1	1	1	2	11	1	1	1	1	4
2	2	2	2	2	2	2	2	16	2	2	2	2	8
1	1	2	2	1	1	1	2	11	2	1	1	1	5
3	3	3	3	3	3	3	3	24	3	3	3	3	12
1	1	1	1	2	1	2	2	11	2	1	1	1	5
3	1	2	2	1	1	2	1	13	1	1	1	1	4
1	1	2	1	1	1	1	2	10	2	1	1	1	5
3	3	2	1	1	1	1	1	13	1	1	1	1	4
2	2	1	1	1	2	2	3	14	2	1	1	1	5
2	2	2	1	1	2	1	2	13	1	1	1	1	4
4	4	5	5	1	1	4	4	28	1	1	1	1	4
3	1	1	3	3	1	1	3	16	1	1	1	1	4
2	2	2	2	3	1	1	2	15	2	1	1	1	5
1	1	1	1	1	1	1	1	8	2	1	2	1	6
3	3	3	2	1	2	2	3	19	2	1	1	1	5
3	3	4	1	1	2	1	1	16	1	1	1	1	4
1	2	4	5	5	1	1	2	21	1	1	2	2	6
3	5	5	5	5	5	5	5	38	5	3	5	5	18
3	3	3	3	3	3	4	3	25	2	1	1	1	5
4	4	4	5	4	4	4	5	34	2	1	1	1	5
3	3	5	5	5	5	5	5	36	3	3	2	2	10
3	2	3	1	5	2	1	1	18	2	1	1	1	5
1	2	1	1	1	1	1	2	10	1	1	1	1	4
3	1	1	2	1	1	1	2	12	2	1	1	1	5
1	1	2	3	1	1	2	3	14	3	1	1	1	6
1	2	1	1	5	1	1	1	13	1	1	1	1	4
1	3	1	1	3	3	1	3	16	1	1	1	1	4
2	2	2	2	3	2	3	2	18	2	1	1	1	5
1	2	2	2	2	2	2	2	15	1	1	1	1	4
3	3	3	3	3	3	3	3	24	1	1	1	3	6
1	1	1	1	2	1	2	1	10	1	1	1	1	4
4	4	4	4	4	4	4	4	32	4	4	4	4	16
2	1	2	2	1	1	2	2	13	2	1	2	1	6
1	1	2	1	1	1	2	1	10	2	1	1	1	5
2	4	4	3	2	2	2	2	21	5	2	1	1	9
4	4	3	4	4	2	2	3	26	2	2	2	2	8
5	5	4	4	2	3	2	4	29	2	1	1	1	5
2	1	2	2	2	2	3	3	17	1	1	1	1	4
2	2	1	1	1	1	1	1	10	1	1	1	1	4
1	1	2	2	2	1	2	2	13	2	1	1	1	5
2	3	1	2	1	1	2	2	14	2	1	1	1	5
3	3	2	2	3	3	3	3	22	3	3	3	3	12
1	1	1	1	1	1	3	1	10	2	1	1	1	5
1	1	1	1	2	2	1	2	11	1	1	1	1	4
3	2	2	2	2	2	2	3	18	2	2	2	2	8
2	4	3	2	2	2	3	2	20	2	2	3	2	9
1	1	1	1	1	2	1	2	10	1	1	1	1	4
4	2	3	1	2	2	1	4	19	1	1	1	1	4
5	4	4	3	3	2	3	4	28	3	1	1	2	7
4	4	1	1	1	2	1	1	15	2	1	1	1	5
2	1	2	1	1	1	3	2	13	1	1	1	1	4
2	1	1	1	1	1	1	1	9	1	1	1	1	4
2	1	1	1	1	1	1	1	9	1	1	1	1	4
1	1	2	3	1	2	2	1	13	2	1	2	1	6
1	1	1	2	2	1	1	2	11	2	1	1	1	5
3	1	1	1	1	1	2	2	12	2	2	1	1	6
2	1	1	1	4	2	2	2	15	2	2	1	1	6
3	3	3	3	3	3	3	3	24	3	3	3	3	12
2	3	1	2	3	1	1	1	14	3	3	1	1	8
2	1	1	1	3	1	2	2	13	1	1	1	1	4
3	3	3	4	5	2	3	3	26	2	1	2	2	7
4	3	3	4	3	3	3	3	26	3	3	3	3	12
3	4	3	3	3	4	2	3	25	2	2	2	1	7
1	1	2	1	2	1	1	1	10	2	1	1	1	5
1	1	1	2	2	1	2	2	12	2	2	2	2	8
2	1	2	2	1	1	1	3	13	2	1	1	1	5
4	1	2	3	5	1	2	3	21	1	1	1	1	4
3	3	1	3	1	1	1	3	16	2	2	2	2	8
4	4	3	3	3	2	3	3	25	2	1	1	1	5
3	2	2	2	2	2	1	2	16	1	1	1	1	4
2	1	2	2	1	1	1	1	11	3	1	1	1	6
3	2	3	2	1	1	3	3	18	3	2	2	1	8
3	1	1	1	1	5	3	1	16	1	1	1	1	4
3	3	2	1	3	3	1	1	17	1	1	1	1	4
4	3	4	3	4	2	3	3	26	3	1	2	2	8
3	3	2	2	1	1	1	2	15	2	1	1	1	5
3	1	1	1	1	1	1	2	11	1	1	1	1	4
2	1	2	1	1	1	2	1	11	1	1	1	1	4
4	4	4	4	4	4	3	3	30	1	1	1	1	4
2	2	2	2	1	1	1	2	13	2	1	1	1	5
3	3	3	3	3	3	3	3	24	2	1	1	1	5
1	1	1	1	1	1	2	2	10	1	1	1	1	4
3	3	3	3	3	3	3	3	24	2	1	1	2	6
1	1	1	1	5	1	1	1	12	1	1	1	1	4
3	3	3	1	2	1	1	1	15	3	1	1	1	6
2	4	1	1	2	1	2	2	15	2	1	1	1	5
2	1	2	1	1	1	2	3	13	2	1	1	1	5
1	2	1	2	1	1	2	2	12	1	1	1	1	4
2	2	1	2	1	1	1	2	12	2	1	1	1	5
2	2	2	2	2	2	1	2	15	1	1	1	1	4
2	2	1	1	1	1	2	2	12	1	1	1	1	4
3	3	2	3	2	2	2	3	20	2	1	1	1	5
2	2	1	2	1	1	1	3	13	3	2	1	1	7
1	1	1	3	1	1	5	1	14	1	1	1	1	4
2	2	1	1	1	1	1	1	10	1	1	1	1	4
3	2	2	3	3	3	2	4	22	1	1	1	1	4
2	1	1	2	1	1	1	1	10	2	1	1	1	5
2	3	2	2	1	1	1	3	15	3	2	2	2	9
4	4	4	4	1	3	4	3	27	1	1	1	1	4
3	2	2	2	2	1	5	3	20	2	1	1	2	6
4	3	3	3	3	3	3	3	25	3	3	3	3	12
5	5	5	2	2	1	1	2	23	2	1	1	1	5
1	1	1	1	1	1	1	1	8	3	3	1	1	8
1	1	3	3	1	1	1	3	14	1	3	1	1	6
3	3	2	2	2	2	2	3	19	2	2	2	1	7
3	3	1	1	1	1	1	1	12	1	1	1	1	4
3	3	3	3	3	3	2	3	23	1	1	1	1	4
2	1	1	2	2	1	2	2	13	2	1	2	1	6
2	1	1	2	1	1	1	2	11	2	1	1	1	5
4	4	2	2	1	1	3	3	20	3	1	2	2	8
3	3	3	3	3	3	4	1	23	2	2	3	2	9
3	3	2	2	2	1	2	2	17	3	2	2	1	8
3	4	3	3	3	3	3	3	25	3	3	3	4	13
3	3	2	2	1	1	3	3	18	2	1	1	1	5
3	3	4	3	3	2	2	2	22	1	1	1	1	4
2	1	2	2	1	1	2	3	14	2	2	1	2	7
2	2	2	2	1	1	1	2	13	1	1	1	1	4
3	3	1	2	1	3	1	2	16	3	3	3	3	12
2	1	1	2	2	1	2	1	12	2	1	1	1	5
2	1	1	2	1	1	3	3	14	3	2	3	2	10
4	4	3	2	1	1	1	2	18	2	1	1	1	5
1	1	1	2	1	1	1	1	9	2	2	2	2	8
4	4	2	4	2	1	2	4	23	2	2	2	2	8
2	1	2	2	2	2	2	2	15	2	1	1	1	5
2	1	2	2	1	1	2	2	13	2	1	2	2	7
2	1	1	2	1	1	2	2	12	1	1	1	1	4
2	1	3	2	2	2	2	1	15	2	1	1	1	5
2	1	3	2	5	1	1	1	16	1	1	1	1	4
1	1	1	3	1	1	2	2	12	2	1	1	1	5
5	5	3	5	5	5	1	5	34	1	1	1	1	4
1	3	2	1	3	1	2	2	15	2	1	1	1	5
1	1	1	1	1	1	1	1	8	2	2	2	2	8
2	2	1	1	2	1	1	1	11	1	1	1	1	4
2	2	2	2	2	1	3	2	16	1	2	1	1	5
3	2	2	3	2	2	2	2	18	2	1	1	1	5
1	2	1	1	1	1	2	2	11	1	1	1	1	4
2	1	1	1	1	1	1	2	10	2	1	2	1	6
4	4	4	4	4	4	2	4	30	1	1	1	1	4
2	2	2	3	1	1	1	3	15	2	1	2	1	6
3	4	3	2	1	2	2	3	20	2	1	1	1	5
2	2	1	2	1	2	1	1	12	2	1	1	1	5
1	1	1	1	2	1	1	1	9	1	1	1	1	4
1	1	2	3	3	2	2	3	17	2	2	2	2	8
2	1	2	1	2	1	5	2	16	2	1	1	1	5
1	1	1	1	1	1	1	1	8	2	1	1	1	5
3	4	2	1	3	3	3	3	22	3	3	3	3	12
3	3	3	3	3	3	3	3	24	3	3	3	3	12
3	2	1	1	1	1	1	1	11	2	1	2	1	6
1	1	2	2	1	1	2	2	12	2	1	2	1	6
2	2	1	1	1	1	1	1	10	1	1	1	1	4
4	4	3	4	3	3	3	3	27	3	1	1	2	7
3	3	3	3	4	3	2	3	24	2	2	2	2	8
3	1	1	1	1	2	2	3	14	1	1	1	1	4
3	2	3	3	1	1	1	3	17	1	1	1	1	4
4	4	4	3	4	4	4	4	31	3	2	1	1	7
1	1	2	2	1	1	2	1	11	1	1	1	1	4
3	3	3	2	1	1	1	3	17	2	1	1	1	5
2	2	1	2	2	1	3	3	16	1	1	1	1	4
2	3	3	2	1	1	1	3	16	1	1	1	1	4
2	2	2	1	2	1	1	1	12	1	1	1	1	4
2	2	2	2	2	1	1	1	13	1	1	1	1	4
4	4	5	3	4	1	1	3	25	2	1	1	1	5
2	2	1	2	2	2	2	2	15	1	1	1	1	4
3	2	2	2	1	1	2	2	15	2	1	1	1	5
3	2	3	4	5	3	3	4	27	3	2	1	1	7
2	2	3	3	2	1	3	3	19	2	1	1	1	5
3	2	3	3	1	1	1	2	16	2	2	1	1	6
4	4	3	3	3	3	2	2	24	2	1	1	1	5
2	1	1	1	1	1	1	1	9	2	1	1	1	5
2	1	1	1	1	1	1	2	10	2	1	1	1	5
1	2	1	1	1	1	1	1	9	1	1	1	1	4
3	3	3	3	3	3	3	3	24	3	3	3	3	12
2	2	1	2	1	1	2	1	12	2	1	1	1	5
2	1	2	2	1	2	2	2	14	2	1	1	1	5
3	4	1	1	1	2	1	4	17	2	1	1	1	5
1	2	1	1	1	1	1	1	9	1	1	2	1	5
2	1	1	1	2	1	2	2	12	1	1	1	1	4
5	5	5	5	5	5	5	5	40	3	5	3	3	14
4	3	5	3	3	3	3	3	27	3	3	5	3	14
2	2	2	2	2	1	2	2	15	2	2	2	1	7
3	3	5	2	3	3	1	4	24	3	1	1	2	7
2	3	3	2	3	3	3	1	20	1	1	1	1	4
3	3	3	3	3	3	3	3	24	3	3	3	3	12
2	2	4	3	1	1	2	2	17	1	1	1	1	4
3	2	2	3	2	2	2	2	18	2	1	2	2	7
1	2	1	1	1	1	1	2	10	1	1	1	1	4
3	1	2	1	1	1	1	1	11	1	1	1	1	4
3	3	3	3	3	3	2	3	23	2	1	1	1	5
1	1	3	1	1	1	5	1	14	1	1	1	1	4
4	4	3	4	3	4	4	4	30	3	2	2	2	9
1	1	2	2	3	1	1	2	13	1	1	1	1	4
1	1	1	2	1	1	1	2	10	1	1	1	1	4
2	3	2	2	3	3	3	3	21	3	3	3	3	12
2	2	1	1	1	1	1	2	11	1	1	1	1	4
4	4	4	4	2	3	3	4	28	1	1	1	1	4
2	1	2	2	1	1	1	1	11	2	1	2	1	6
1	1	5	3	4	1	4	3	22	2	1	1	1	5
2	2	2	2	3	3	2	2	18	1	1	1	1	4
3	3	3	3	3	3	3	3	24	3	3	3	3	12
4	4	4	4	1	2	3	4	26	2	1	2	1	6
3	3	3	3	3	2	2	3	22	2	2	2	2	8
1	1	2	1	1	1	2	1	10	3	1	1	1	6
1	1	1	1	2	1	1	1	9	2	1	1	1	5
2	1	1	2	4	1	1	2	14	2	2	1	1	6
3	3	3	3	3	3	3	3	24	3	3	3	3	12
2	1	2	1	1	1	1	2	11	2	1	1	1	5
4	2	3	1	5	1	2	1	19	1	1	1	1	4
3	3	3	4	3	2	2	2	22	1	1	2	2	6
2	1	3	2	2	1	3	2	16	1	1	1	1	4
2	2	2	1	1	1	1	1	11	2	1	1	1	5
1	1	1	1	1	1	1	1	8	1	2	1	1	5
3	3	3	2	2	2	1	4	20	1	1	1	1	4
1	2	1	1	1	1	1	1	9	2	1	1	1	5
3	2	3	3	1	2	1	3	18	1	1	1	1	4
3	3	3	3	3	3	3	3	24	3	3	3	3	12
2	2	3	3	3	4	3	2	22	2	1	1	4	8
1	1	1	2	2	1	1	2	11	2	1	2	2	7
3	3	3	3	3	3	3	3	24	3	3	3	2	11
2	1	1	2	1	1	2	2	12	2	1	1	2	6
2	2	3	3	3	2	2	2	19	2	1	1	1	5
1	1	1	1	2	2	1	1	10	1	1	1	1	4
1	1	3	3	2	1	5	2	18	2	1	1	1	5
3	3	2	2	1	1	2	2	16	1	1	1	1	4
3	3	1	1	2	2	1	3	16	1	1	1	1	4
3	1	2	2	1	1	1	2	13	1	1	2	1	5
2	1	2	2	1	1	3	3	15	2	2	2	1	7
2	1	1	2	1	1	1	2	11	2	1	1	1	5
3	3	2	2	1	1	2	3	17	2	2	1	2	7
2	2	2	2	2	2	2	2	16	2	2	1	1	6
3	2	1	1	3	1	3	1	15	1	1	1	1	4
3	3	2	1	3	1	2	3	18	2	1	1	1	5
2	2	5	5	1	1	1	1	18	2	1	1	1	5
2	1	1	1	1	1	1	1	9	1	1	1	1	4
2	1	2	2	2	2	2	2	15	2	2	1	1	6
3	3	2	1	3	1	2	2	17	3	2	3	1	9
1	1	1	1	1	1	3	1	10	1	1	1	1	4
3	1	1	2	3	1	3	3	17	2	1	1	1	5
1	1	1	1	2	1	2	1	10	1	1	1	1	4
4	1	3	3	1	2	1	3	18	2	2	2	1	7
2	1	2	2	2	1	1	2	13	2	1	1	1	5
2	2	3	3	1	1	2	2	16	2	1	2	1	6
2	2	1	1	2	1	5	1	15	1	1	1	1	4
2	2	2	1	3	2	2	2	16	2	1	1	1	5
2	2	2	2	2	2	2	2	16	2	2	2	2	8
1	1	3	2	1	1	3	1	13	1	1	1	1	4
2	2	3	3	3	3	1	2	19	1	1	1	1	4
1	2	3	2	1	2	2	3	16	2	1	1	1	5
1	1	1	2	1	1	1	1	9	2	1	1	1	5
2	2	2	2	3	1	3	2	17	2	1	1	1	5
4	3	2	2	3	4	4	4	26	3	2	2	2	9
1	1	2	2	2	2	2	2	14	1	1	1	1	4
2	1	1	2	1	1	1	2	11	1	1	1	1	4
2	2	1	2	1	1	2	1	12	2	1	1	2	6
1	2	2	2	4	3	2	2	18	1	1	1	2	5
2	2	2	3	1	1	4	2	17	2	1	1	1	5
3	3	3	2	3	3	3	3	23	2	1	1	1	5
5	1	1	1	1	1	1	1	12	1	1	1	1	4
3	1	1	2	1	3	3	3	17	3	3	1	1	8
2	2	2	3	2	2	2	2	17	2	1	1	1	5
4	4	3	3	4	3	3	4	28	3	1	2	1	7
2	1	1	1	1	1	1	1	9	2	2	1	1	6
3	1	3	2	1	2	2	2	16	2	1	1	1	5
3	2	3	2	2	2	3	3	20	2	1	1	1	5
3	2	3	3	2	1	2	3	19	2	2	2	2	8
2	2	2	2	1	2	2	3	16	2	1	1	1	5
3	3	2	2	1	1	2	2	16	2	1	1	1	5
3	3	3	3	3	1	1	1	18	1	1	1	1	4
4	5	3	3	5	4	2	5	31	2	2	1	2	7
2	3	2	3	3	1	2	4	20	2	1	1	1	5
3	3	5	3	3	3	5	3	28	2	2	2	2	8
3	3	1	2	4	1	2	1	17	1	1	1	1	4
1	1	1	1	5	1	1	1	12	1	1	1	1	4
3	1	1	1	3	1	2	2	14	1	1	1	1	4
1	3	4	3	3	3	3	3	23	1	2	2	1	6
1	1	3	1	1	1	1	1	10	1	1	1	1	4
2	1	1	1	1	1	1	1	9	2	1	1	1	5
3	2	2	1	2	2	1	2	15	2	1	1	1	5
5	5	1	1	1	3	5	3	24	2	2	1	1	6
3	3	2	2	1	1	1	2	15	2	1	1	2	6
2	1	2	2	2	1	4	2	16	2	1	1	1	5
2	2	1	1	2	1	1	3	13	2	1	1	1	5
3	2	2	3	1	1	3	1	16	2	1	1	2	6
2	2	2	2	1	1	1	1	12	1	1	1	1	4
3	3	3	3	3	3	3	3	24	3	3	3	3	12
3	4	2	1	2	2	4	2	20	2	2	2	2	8
3	2	5	4	5	3	3	5	30	3	2	2	2	9
2	1	1	1	2	1	1	1	10	1	1	1	1	4
4	3	3	2	3	3	3	3	24	1	1	1	1	4
3	2	2	2	2	1	1	2	15	2	1	1	1	5
5	4	4	3	4	2	3	3	28	3	1	1	1	6
3	1	2	1	1	1	2	2	13	2	1	1	1	5
1	1	1	1	2	1	3	1	11	3	1	1	1	6
3	3	3	2	1	1	4	4	21	2	1	1	1	5
3	3	3	3	3	3	3	3	24	3	3	3	3	12
1	1	1	2	1	1	1	1	9	1	1	1	1	4
3	3	3	3	3	3	3	3	24	3	3	3	3	12
3	1	1	1	1	1	1	1	10	1	1	1	1	4
3	2	4	1	4	3	2	1	20	2	1	1	1	5
1	1	1	1	3	3	2	1	13	1	1	1	1	4
2	1	2	1	1	1	1	1	10	1	1	1	1	4
2	2	1	1	2	1	3	1	13	2	1	1	1	5
3	3	3	3	3	3	3	3	24	3	3	3	3	12
3	3	2	3	3	3	3	4	24	2	2	2	2	8
2	2	2	1	1	1	1	1	11	1	1	1	1	4
2	1	1	1	1	1	1	1	9	2	2	1	1	6
3	1	1	1	1	1	1	1	10	1	1	1	1	4
2	1	2	2	1	1	3	5	17	2	1	1	1	5
1	1	3	3	1	1	5	1	16	3	2	2	2	9
3	4	3	3	4	3	3	3	26	2	1	1	1	5
5	5	4	3	4	4	4	5	34	2	1	1	1	5
3	2	2	2	3	1	2	2	17	2	1	1	2	6
4	4	3	4	1	1	5	4	26	2	1	1	2	6
1	1	1	2	1	1	1	3	11	2	2	2	2	8
3	1	1	2	1	1	2	2	13	2	1	2	1	6
2	1	2	2	2	1	2	2	14	2	1	1	1	5
2	2	1	1	3	1	1	1	12	1	1	1	1	4
2	2	2	1	1	1	1	2	12	2	1	1	1	5
2	1	3	1	1	1	3	3	15	1	1	1	1	4
3	4	4	3	4	4	2	2	26	2	1	1	1	5
2	1	2	1	1	1	1	2	11	3	1	1	1	6
3	2	3	1	3	1	1	1	15	1	1	1	1	4
2	3	3	2	1	1	3	2	17	2	1	1	1	5
2	1	2	2	2	2	2	2	15	1	1	1	1	4
3	2	3	2	1	1	1	1	14	1	1	1	1	4
3	1	3	2	1	1	1	1	13	2	1	1	1	5
3	3	3	3	3	1	1	3	20	3	1	1	1	6
2	2	2	2	2	1	1	2	14	1	1	1	1	4
1	1	2	1	3	1	2	1	12	2	1	1	1	5
1	2	1	3	2	1	1	3	14	1	1	1	1	4
3	2	3	2	3	2	1	2	18	2	1	1	1	5
1	1	2	2	1	1	1	1	10	2	1	1	1	5
4	4	4	4	4	4	3	4	31	3	2	2	2	9
2	2	2	2	4	2	2	2	18	3	2	1	1	7
2	1	2	1	2	1	5	1	15	3	2	1	1	7
2	3	2	2	2	2	2	2	17	2	2	2	2	8
2	1	3	2	1	1	1	1	12	1	1	1	1	4
2	2	2	2	1	1	1	1	12	1	1	1	1	4
2	2	2	1	1	1	1	2	12	2	1	1	1	5
2	2	1	1	2	1	1	2	12	1	1	1	1	4
2	1	2	3	1	1	1	2	13	3	2	2	2	9
2	2	2	2	2	2	2	1	15	2	1	1	1	5
2	1	1	2	2	1	1	1	11	2	1	1	1	5
3	2	1	2	1	1	2	1	13	2	2	1	1	6
2	2	3	3	3	3	2	2	20	2	1	2	1	6
3	2	2	3	2	2	1	2	17	2	1	1	1	5
2	3	3	2	1	1	2	2	16	1	1	1	1	4
2	2	2	2	2	1	3	2	16	2	1	1	1	5
3	3	2	2	2	1	1	2	16	1	5	1	1	8
2	2	1	1	3	1	1	3	14	1	1	1	1	4
4	3	3	2	1	1	1	2	17	2	1	1	1	5
2	2	2	1	5	4	1	2	19	2	2	2	2	8
5	4	5	4	4	4	4	4	34	4	4	4	4	16
2	1	2	1	2	2	2	2	14	1	1	1	1	4
1	1	1	2	1	1	1	1	9	1	1	1	1	4
3	1	3	2	1	1	1	1	13	2	1	1	1	5
3	3	3	3	3	3	4	2	24	2	2	2	1	7
2	1	1	1	1	1	1	3	11	2	1	1	1	5
2	1	2	1	1	1	1	1	10	1	1	1	1	4
4	3	2	3	2	2	4	3	23	2	1	1	1	5
3	3	2	2	3	1	1	1	16	1	1	1	1	4
2	2	2	2	2	2	2	2	16	2	2	2	1	7
3	3	2	1	1	1	1	1	13	1	1	1	1	4
2	2	2	1	1	1	2	1	12	2	1	1	1	5
3	3	3	3	3	3	3	3	24	3	3	3	3	12
2	1	1	1	1	1	1	1	9	1	1	1	1	4
3	2	2	3	2	2	3	3	20	2	2	1	1	6
2	2	1	2	1	1	2	2	13	2	1	1	1	5
3	3	1	1	1	1	3	1	14	1	1	1	1	4
2	1	1	1	1	1	1	1	9	1	1	1	1	4
2	1	3	1	1	2	2	2	14	1	1	1	1	4
2	2	2	2	2	1	1	2	14	1	1	1	1	4
3	3	3	3	3	3	2	2	22	1	1	1	1	4
1	2	1	1	1	1	1	1	9	2	1	1	1	5
3	1	1	1	5	1	1	1	14	1	1	1	1	4
1	1	1	1	1	1	1	1	8	2	1	1	1	5
1	1	1	1	1	1	1	1	8	3	1	1	2	7
1	1	2	1	1	1	1	2	10	2	1	2	2	7
3	3	4	2	2	3	2	2	21	1	1	1	1	4
2	2	1	2	3	2	3	3	18	2	1	1	1	5
1	5	1	1	1	1	1	4	15	1	1	1	1	4
3	3	3	3	1	1	1	1	16	1	1	1	1	4
1	1	1	1	1	1	1	1	8	2	1	1	1	5
1	1	4	2	2	1	2	1	14	2	1	1	1	5
2	2	2	1	2	1	1	1	12	2	1	1	1	5
2	2	1	2	1	1	1	1	11	2	1	1	1	5
3	3	3	3	3	1	1	2	19	2	1	1	1	5
2	1	3	1	1	1	1	1	11	1	1	1	1	4
5	4	4	5	3	3	2	5	31	2	1	1	1	5
3	3	2	2	1	1	4	2	18	1	1	1	1	4
3	5	3	1	1	1	1	1	16	2	2	1	1	6
2	2	3	3	2	2	3	2	19	2	1	1	1	5
1	1	1	1	1	1	1	2	9	2	1	2	1	6
3	2	2	2	1	1	2	2	15	2	1	1	1	5
3	3	4	4	3	4	4	3	28	3	4	1	1	9
3	3	3	3	3	3	3	3	24	3	3	3	3	12
2	2	2	2	2	2	2	2	16	2	1	1	1	5
4	4	2	3	3	2	2	3	23	2	2	3	1	8
2	2	2	2	2	2	2	4	18	1	1	1	1	4
1	1	1	1	1	1	1	2	9	1	1	1	1	4
1	1	3	1	2	2	2	2	14	2	1	1	1	5
3	3	4	3	4	3	4	4	28	4	2	2	2	10
3	2	3	2	3	2	1	3	19	2	1	1	1	5
2	2	2	1	1	1	2	2	13	2	1	1	1	5
2	2	1	1	3	1	1	1	12	2	1	1	1	5
3	3	2	3	3	3	3	3	23	3	3	3	3	12
2	2	2	2	2	2	2	2	16	1	1	1	1	4
2	2	3	3	2	2	2	3	19	3	2	1	1	7
2	1	2	2	2	1	1	3	14	2	1	1	1	5
1	2	1	1	1	1	3	2	12	2	1	1	1	5
3	4	4	2	2	3	3	3	24	3	3	3	3	12
3	3	2	2	3	1	1	1	16	1	1	1	1	4
3	3	3	2	3	2	1	2	19	2	1	1	1	5
2	1	2	2	3	1	3	3	17	2	2	2	1	7
3	1	1	1	3	1	1	1	12	1	1	1	1	4
3	3	3	3	3	3	3	3	24	3	3	3	3	12
3	2	1	1	2	2	2	2	15	3	1	1	1	6
3	2	2	2	2	1	1	2	15	2	1	1	1	5
1	2	2	2	2	1	1	2	13	1	1	1	1	4
3	2	2	2	3	2	2	3	19	2	1	1	1	5
3	3	3	3	3	3	3	3	24	3	3	3	3	12
2	1	1	1	1	1	2	1	10	1	1	1	1	4
2	2	1	3	3	3	3	1	18	1	1	1	1	4
3	3	3	3	3	3	3	3	24	3	3	3	3	12
4	4	3	2	2	2	1	2	20	3	1	2	2	8
1	1	2	2	1	1	2	2	12	2	1	1	1	5
3	3	3	3	3	3	2	3	23	1	1	2	1	5
3	1	1	1	1	1	1	2	11	2	1	2	1	6
3	3	3	3	3	1	1	4	21	3	1	2	1	7
2	2	2	2	2	2	2	2	16	2	2	2	4	10
2	2	1	1	1	2	1	2	12	2	1	1	1	5
3	3	2	3	3	3	1	2	20	2	1	1	2	6
3	3	3	3	3	3	3	3	24	3	3	3	3	12
2	1	1	1	1	1	1	2	10	2	1	1	1	5
3	1	2	1	2	2	1	2	14	1	1	1	2	5
3	2	1	1	1	1	3	1	13	1	1	1	1	4
3	2	2	1	1	1	2	2	14	1	1	1	1	4
1	1	1	1	5	1	1	1	12	3	1	2	1	7
3	3	3	3	3	3	3	3	24	3	3	3	3	12
2	1	1	2	1	1	2	2	12	2	1	3	1	7
2	2	1	1	1	1	1	1	10	4	2	1	2	9
2	1	2	2	3	2	3	2	17	1	1	1	1	4
4	2	4	4	1	1	1	4	21	2	1	1	1	5
1	1	1	2	1	1	2	2	11	1	1	2	2	6
2	3	3	3	1	1	2	2	17	3	2	2	1	8
2	2	2	2	2	2	2	2	16	2	1	1	1	5
1	1	2	1	1	1	2	3	12	1	2	1	1	5
3	3	3	3	3	3	3	3	24	3	3	3	3	12
4	4	4	4	4	4	3	3	30	1	1	1	1	4
4	1	2	1	2	1	1	1	13	2	3	2	2	9
4	4	4	2	4	3	3	3	27	3	3	3	3	12
2	1	3	2	1	2	1	2	14	2	1	3	1	7
2	1	1	1	1	1	1	2	10	2	1	1	1	5
3	2	1	3	2	1	1	4	17	2	1	1	1	5
1	2	2	1	3	3	2	2	16	2	2	1	1	6
2	2	2	2	2	2	2	2	16	1	1	1	1	4
3	3	2	2	4	1	2	2	19	3	1	2	1	7
3	2	2	2	2	1	2	1	15	2	1	1	1	5
4	3	3	2	4	2	3	3	24	1	1	1	1	4
1	2	2	2	3	3	4	2	19	3	1	2	2	8
3	2	4	3	2	4	2	3	23	2	2	2	2	8
3	3	3	3	3	2	2	2	21	2	1	1	1	5
3	3	3	3	3	3	3	3	24	3	3	3	3	12
3	1	2	2	1	1	1	1	12	2	1	1	1	5
4	4	3	3	3	3	2	3	25	2	1	1	2	6
3	2	2	3	3	1	3	2	19	4	2	1	3	10
1	1	1	2	1	1	2	3	12	2	1	1	1	5
4	4	4	3	3	5	5	5	33	5	4	5	1	15
3	2	1	2	5	2	2	2	19	1	1	1	1	4
3	3	3	3	1	1	2	1	17	1	1	1	1	4
2	1	1	3	3	1	1	1	13	1	1	1	1	4
2	1	3	3	1	1	2	3	16	2	1	2	2	7
2	2	2	2	2	4	2	4	20	2	1	1	1	5
3	3	3	3	3	3	3	3	24	3	3	3	3	12
3	1	2	3	2	1	1	2	15	2	1	1	1	5
2	1	5	1	3	1	1	1	15	1	1	1	1	4
3	3	3	3	3	2	3	3	23	1	1	1	1	4
1	1	1	1	1	1	3	3	12	4	2	2	1	9
1	2	1	1	1	1	2	3	12	3	2	2	2	9
3	3	2	2	1	1	3	2	17	1	1	1	1	4
3	3	2	1	2	1	2	2	16	1	1	1	1	4
4	4	2	2	2	2	2	3	21	2	1	1	1	5
3	3	3	3	3	3	3	3	24	1	1	1	1	4
3	3	2	2	1	1	2	3	17	1	1	1	1	4
2	2	2	1	1	1	1	3	13	3	3	2	1	9
1	1	1	1	1	1	1	1	8	2	2	1	1	6
2	1	1	1	1	1	1	1	9	1	1	1	1	4
3	3	2	3	4	3	3	3	24	2	2	2	1	7
2	2	2	2	2	2	3	1	16	1	1	1	1	4
2	1	1	1	1	1	1	1	9	1	1	1	1	4
1	1	1	1	1	1	1	1	8	2	1	1	1	5
1	2	1	2	2	2	2	3	15	2	1	2	2	7
3	1	1	1	1	1	1	2	11	1	1	1	1	4
5	2	3	3	3	3	2	2	23	1	1	1	1	4
4	3	3	2	5	3	4	3	27	2	2	2	2	8
4	3	1	2	1	1	1	1	14	1	1	1	1	4
1	3	4	1	3	3	3	3	21	3	3	1	1	8
2	2	1	1	1	1	1	2	11	2	1	1	1	5
2	2	2	4	4	3	3	2	22	3	4	3	1	11
5	1	1	1	1	5	2	5	21	2	1	1	1	5
3	3	1	1	2	1	1	2	14	1	1	1	1	4
4	4	3	3	3	2	3	2	24	2	1	1	1	5
3	5	1	1	5	1	5	1	22	1	1	3	3	8
2	3	1	2	1	1	2	2	14	1	1	1	1	4
4	3	3	3	3	3	1	4	24	2	1	1	1	5
2	1	2	1	1	1	1	2	11	2	1	1	1	5
3	1	2	2	1	1	1	5	16	1	1	1	1	4
5	5	5	5	5	5	4	5	39	2	1	1	1	5
2	2	1	3	2	1	2	2	15	3	1	2	2	8
3	3	2	3	3	3	2	3	22	5	2	2	1	10
1	1	1	1	2	2	1	2	11	1	1	1	1	4
4	4	3	3	3	2	2	4	25	2	2	2	1	7
3	2	3	3	1	1	1	3	17	2	1	1	1	5
1	1	1	1	1	1	2	2	10	4	5	5	5	19
2	1	1	2	2	1	1	2	12	1	1	1	1	4
4	4	4	4	4	4	4	4	32	4	4	2	3	13
4	4	3	4	3	3	3	4	28	3	2	2	3	10
3	3	2	4	2	4	4	5	27	3	1	1	1	6
2	2	4	4	2	2	3	3	22	2	5	2	2	11
1	1	2	1	2	1	3	2	13	2	1	1	1	5
2	2	1	2	1	3	3	3	17	2	1	1	1	5
1	3	3	3	3	3	3	3	22	2	2	1	1	6
3	2	3	1	3	1	3	3	19	2	1	1	1	5
3	2	3	3	4	3	4	3	25	3	3	3	3	12
3	1	2	1	5	1	1	1	15	3	1	1	1	6
3	1	2	1	1	1	1	1	11	2	1	2	2	7
2	2	2	2	1	1	2	1	13	2	1	1	2	6
3	3	3	3	3	3	3	3	24	3	3	3	3	12
3	3	3	3	1	3	1	1	18	3	1	1	1	6
4	2	3	2	3	2	2	2	20	1	1	1	1	4
3	3	3	2	2	2	1	1	17	2	1	1	1	5
3	3	3	3	3	3	3	3	24	3	3	3	3	12
3	2	2	2	1	1	1	2	14	2	1	2	1	6
3	1	2	2	1	1	2	2	14	3	2	2	2	9
3	2	2	3	2	2	2	4	20	2	1	1	1	5
3	3	2	1	2	1	1	2	15	1	1	1	1	4
5	5	2	5	1	1	3	5	27	2	1	2	1	6
1	3	3	3	2	1	1	3	17	2	2	2	1	7
2	2	1	1	5	1	3	1	16	1	1	1	1	4
3	2	3	1	3	2	3	2	19	2	2	1	1	6
3	3	3	3	4	3	3	3	25	3	3	3	3	12
3	3	3	3	3	3	3	3	24	3	3	3	3	12
3	3	3	3	3	3	3	3	24	3	3	3	3	12
4	1	1	1	1	2	2	1	13	3	3	2	1	9
2	2	2	2	3	2	2	3	18	2	2	1	1	6
5	5	4	3	3	3	3	3	29	2	1	1	1	5
2	1	3	2	3	2	1	1	15	1	1	1	1	4
2	2	3	2	3	3	3	3	21	2	2	2	1	7
2	1	1	1	1	1	3	2	12	1	1	1	1	4
2	1	2	2	1	1	2	3	14	3	4	2	2	11
1	2	1	1	1	1	1	1	9	2	1	1	1	5
1	1	1	1	1	1	1	1	8	2	2	1	1	6
2	2	2	2	1	2	1	2	14	2	1	2	2	7
3	3	3	3	2	2	2	2	20	3	2	2	2	9
1	1	1	1	2	1	1	2	10	1	1	1	1	4
2	1	1	2	1	1	3	2	13	2	1	1	1	5
2	1	2	2	1	1	1	2	12	2	2	1	1	6
2	2	2	2	2	2	3	3	18	1	1	1	1	4
4	3	2	2	3	3	1	1	19	2	1	1	1	5
4	3	4	4	4	4	4	4	31	4	4	4	4	16
5	3	3	3	3	3	3	3	26	3	1	1	1	6
2	1	3	2	5	1	2	2	18	2	1	1	1	5
5	3	2	3	5	2	2	5	27	2	1	1	1	5
1	1	1	1	1	1	1	1	8	2	1	1	1	5
2	2	2	1	3	2	2	2	16	2	1	1	1	5
3	3	3	2	3	3	3	3	23	3	3	2	2	10
4	4	4	4	4	5	5	3	33	5	5	5	5	20
3	2	3	2	1	1	2	2	16	2	1	1	1	5
3	3	3	3	3	3	3	3	24	2	1	1	1	5
3	3	2	1	2	2	2	3	18	2	1	2	2	7
4	4	3	2	4	3	2	2	24	3	3	2	2	10
3	2	3	4	5	2	5	5	29	5	5	5	2	17
3	3	2	2	3	2	2	2	19	2	1	1	1	5
5	5	5	5	5	5	5	5	40	5	1	1	1	8
2	1	2	1	2	1	1	1	11	1	1	1	1	4
1	2	2	3	2	2	4	3	19	2	2	1	2	7
3	4	3	4	3	3	4	3	27	4	4	3	4	15
4	4	3	3	3	3	3	3	26	2	2	1	1	6
3	2	3	3	2	3	2	3	21	1	1	1	1	4
5	3	4	1	1	2	3	3	22	2	3	3	3	11
4	4	3	2	1	1	5	2	22	2	1	1	1	5
3	2	2	2	2	1	2	2	16	1	1	1	1	4
3	1	1	1	1	1	2	1	11	1	1	1	1	4
3	3	3	3	1	1	1	2	17	1	1	1	1	4
2	2	2	2	2	2	2	2	16	2	2	2	2	8
4	4	5	4	4	4	3	4	32	3	3	1	1	8
1	1	1	2	1	1	3	1	11	2	1	1	1	5
2	1	3	2	2	1	4	3	18	2	1	1	1	5
3	3	3	2	3	3	2	3	22	1	1	1	1	4
1	1	1	1	1	1	3	1	10	2	1	1	1	5
3	3	2	2	1	1	1	2	15	1	1	1	1	4
2	1	2	1	1	1	1	1	10	1	1	1	1	4
3	3	3	2	1	2	2	1	17	1	1	1	1	4
1	2	3	2	4	4	1	1	18	1	1	1	1	4
3	1	1	2	2	1	1	2	13	2	1	1	1	5
2	1	1	1	2	1	1	1	10	2	2	1	1	6
3	3	3	3	3	3	3	3	24	2	2	2	2	8
2	2	2	2	1	1	1	2	13	1	1	1	1	4
3	2	1	1	3	1	2	3	16	2	2	1	1	6
3	3	3	3	3	3	3	3	24	1	1	1	1	4
2	2	2	2	1	2	1	3	15	1	1	1	1	4
2	2	2	2	1	1	3	2	15	2	1	2	1	6
1	2	3	2	1	1	1	2	13	1	1	1	1	4
1	1	2	1	1	1	2	2	11	2	1	1	1	5
1	1	1	1	1	1	3	5	14	1	4	1	1	7
2	1	1	1	1	1	1	2	10	1	1	1	1	4
1	1	1	1	2	1	1	2	10	3	2	1	1	7
1	1	1	2	2	1	1	2	11	3	1	1	1	6
4	3	3	4	4	3	3	3	27	3	1	1	1	6
2	2	2	3	3	3	3	5	23	1	1	1	1	4
2	3	3	3	3	3	3	2	22	3	3	3	3	12
4	2	1	3	4	1	1	3	19	1	1	1	1	4
1	2	2	1	1	1	1	2	11	2	1	1	1	5
1	1	2	2	1	1	2	2	12	2	2	2	2	8
1	1	1	3	3	1	5	2	17	1	1	1	1	4
5	4	4	1	1	1	1	5	22	1	1	1	1	4
1	1	2	1	1	1	2	1	10	2	1	1	1	5
3	3	3	3	3	3	3	3	24	4	3	3	3	13
5	3	2	2	2	2	2	3	21	2	1	1	1	5
2	2	2	2	3	3	2	3	19	2	1	1	1	5
5	5	5	5	5	4	4	5	38	4	5	4	4	17
2	1	1	2	1	2	4	1	14	1	1	1	1	4
3	2	1	1	1	1	1	1	11	1	1	1	1	4
2	1	2	1	2	1	2	1	12	1	1	1	1	4
3	3	4	3	5	2	4	3	27	3	3	3	3	12
3	3	3	3	3	3	3	3	24	3	3	3	3	12
2	1	1	1	1	1	2	2	11	1	1	2	1	5
1	1	1	3	1	1	1	1	10	1	1	2	1	5
2	2	2	2	1	1	2	1	13	2	1	2	2	7
1	1	1	1	1	1	1	1	8	2	2	2	1	7
3	2	3	1	2	2	2	2	17	4	2	1	1	8
4	2	2	2	4	1	5	3	23	2	1	1	1	5
3	3	1	1	2	1	3	2	16	2	1	1	1	5
1	1	1	1	1	1	1	1	8	1	1	1	2	5
1	1	1	2	1	1	1	1	9	2	1	1	1	5
3	1	3	1	1	1	1	3	14	2	1	1	1	5
4	3	3	3	2	2	2	2	21	2	1	1	1	5
3	2	1	2	1	1	1	1	12	1	1	1	1	4
2	1	2	1	1	1	2	1	11	1	1	1	1	4
3	3	3	3	3	3	3	3	24	3	3	2	2	10
1	1	1	2	3	3	3	3	17	2	1	1	1	5
2	2	2	1	1	1	2	1	12	2	2	2	1	7
3	3	2	2	2	1	2	3	18	2	1	1	1	5
2	2	1	1	1	1	1	3	12	1	1	1	1	4
4	4	4	2	2	2	5	2	25	2	2	2	2	8
3	3	2	2	5	2	1	2	20	1	1	1	1	4
1	1	1	2	1	1	1	1	9	1	1	1	1	4
3	1	3	3	1	1	1	1	14	1	1	1	1	4
3	3	3	3	3	3	3	3	24	3	3	3	3	12
3	3	2	2	2	2	2	3	19	3	2	2	1	8
3	2	1	2	1	2	3	2	16	2	1	1	1	5
3	1	3	2	2	3	1	2	17	2	1	1	1	5
1	2	1	2	1	1	1	1	10	1	1	1	1	4
3	3	4	3	4	4	3	4	28	3	3	3	3	12
3	3	1	1	1	1	1	1	12	1	1	1	1	4
2	2	1	2	3	1	3	2	16	3	1	1	2	7
3	3	3	3	2	2	3	3	22	2	1	2	2	7
2	1	2	3	1	2	2	2	15	2	2	2	1	7
3	2	3	3	3	3	3	3	23	3	3	3	3	12
3	3	3	3	3	3	3	3	24	3	3	3	1	10
2	1	1	2	3	1	2	2	14	2	2	1	1	6
4	4	4	4	4	4	3	4	31	3	1	2	3	9
4	5	5	1	3	1	2	5	26	3	2	2	1	8
4	4	1	3	1	1	1	4	19	1	4	1	1	7
2	1	1	3	2	1	2	3	15	2	1	1	1	5
5	5	5	5	5	5	4	4	38	4	2	2	1	9
4	3	3	2	2	2	3	3	22	1	1	1	1	4
3	2	2	2	3	3	3	3	21	2	1	1	2	6
3	3	2	3	4	1	2	2	20	2	1	1	1	5
2	1	2	2	1	2	1	1	12	1	2	1	1	5
2	2	2	2	1	1	5	1	16	2	1	1	1	5
3	3	3	3	3	3	3	3	24	3	3	3	3	12
3	3	3	3	2	3	1	3	21	2	1	1	1	5
5	4	4	4	3	4	3	3	30	4	4	3	3	14
2	2	3	3	2	1	3	2	18	2	1	1	1	5
3	4	3	4	3	3	2	3	25	2	1	1	1	5
3	3	2	5	3	2	5	3	26	3	2	2	2	9
2	2	2	1	3	2	1	2	15	3	1	2	1	7
5	5	1	1	1	1	4	1	19	4	1	4	4	13
3	3	3	3	2	3	3	3	23	2	1	2	1	6
3	3	3	3	3	3	2	3	23	2	1	2	1	6
4	4	4	3	2	1	4	3	25	3	2	2	1	8
3	3	3	3	3	3	3	3	24	3	3	3	3	12
3	3	3	3	3	3	3	3	24	3	3	3	3	12
3	1	1	2	1	1	1	1	11	2	1	2	1	6
2	2	3	1	1	2	2	3	16	1	1	1	1	4
3	2	2	2	2	1	1	1	14	2	1	2	2	7
5	4	4	4	4	3	4	4	32	4	3	4	3	14
2	2	2	2	2	1	1	1	13	2	2	1	2	7
4	4	4	4	4	3	2	3	28	2	2	2	1	7
3	3	2	2	1	2	2	1	16	1	1	1	1	4
3	2	2	1	1	1	1	1	12	1	1	1	1	4
1	1	1	1	1	1	3	1	10	1	1	1	1	4
2	2	2	2	2	2	2	2	16	2	2	2	2	8
2	1	3	3	1	1	2	2	15	2	1	1	1	5
2	2	2	2	2	2	2	2	16	2	2	2	2	8
3	3	2	2	1	1	1	1	14	1	1	1	1	4
3	3	3	3	3	3	2	3	23	3	3	3	3	12
3	3	2	4	2	2	4	3	23	2	1	1	1	5
3	2	2	2	2	2	2	2	17	3	4	3	2	12
3	3	1	2	2	2	1	2	16	1	1	1	1	4
3	4	3	3	2	3	4	4	26	3	1	2	1	7
3	1	2	2	1	2	2	2	15	2	1	2	1	6
5	4	4	4	2	3	4	4	30	4	4	4	3	15
2	2	2	2	1	1	1	1	12	2	1	2	1	6
2	3	3	3	2	3	1	2	19	2	1	1	1	5
2	1	2	2	2	1	2	2	14	2	2	1	2	7
3	3	2	3	3	3	3	4	24	2	4	1	1	8
2	2	1	1	1	1	3	3	14	2	1	2	1	6
4	4	3	1	2	1	1	3	19	1	1	1	1	4
3	1	1	2	1	1	1	2	12	1	1	1	1	4
4	4	4	2	2	1	2	2	21	1	1	1	1	4
2	1	3	2	1	1	1	1	12	2	2	1	1	6
3	3	3	3	3	3	3	3	24	3	3	3	3	12
3	4	2	2	3	3	3	3	23	3	3	3	3	12
2	3	2	2	1	1	2	1	14	2	1	1	1	5
3	1	3	3	2	2	2	2	18	1	2	1	2	6
3	3	3	3	3	3	3	3	24	3	3	3	3	12
3	3	3	3	3	3	3	3	24	3	3	3	3	12
3	2	2	3	4	1	1	1	17	1	1	1	1	4
4	4	3	4	4	3	3	3	28	2	1	1	1	5
2	2	2	2	3	1	2	1	15	2	1	1	1	5
3	3	3	2	2	2	3	2	20	2	1	2	1	6
3	2	3	1	1	1	3	2	16	2	2	2	2	8
3	3	3	3	3	3	3	3	24	1	1	1	1	4
4	4	3	3	2	2	1	4	23	2	1	1	1	5
1	3	3	2	2	2	1	2	16	1	1	1	1	4
2	1	1	2	1	1	5	2	15	1	1	1	1	4
3	2	4	3	2	2	2	3	21	2	1	2	1	6
4	3	3	2	2	1	1	2	18	2	1	1	1	5
4	5	4	5	5	5	2	3	33	3	2	3	2	10
4	5	4	3	4	3	3	4	30	2	1	2	1	6
3	3	3	3	3	3	3	3	24	1	1	1	1	4
1	2	2	3	2	2	2	3	17	2	2	1	2	7
1	3	3	3	2	2	1	4	19	2	1	1	1	5
3	2	2	2	2	2	3	2	18	2	2	2	2	8
3	3	3	3	2	1	1	2	18	2	2	1	2	7
3	3	3	2	1	2	2	3	19	1	1	1	1	4
3	3	3	3	3	2	3	3	23	3	1	1	1	6
2	3	1	2	1	1	2	1	13	3	1	2	1	7
1	1	1	3	1	1	2	2	12	2	2	2	2	8
2	3	2	3	2	1	2	3	18	1	1	1	1	4
4	3	2	3	3	3	3	4	25	3	4	3	3	13
3	2	1	1	1	1	1	2	12	2	1	1	1	5
2	1	1	1	1	1	1	1	9	1	1	1	1	4
5	5	3	2	2	3	2	5	27	2	1	1	2	6
4	3	3	2	3	2	3	2	22	2	2	2	1	7
2	2	2	2	2	2	1	2	15	3	2	2	2	9
2	2	1	1	1	1	1	3	12	2	1	1	1	5
1	1	1	3	1	1	1	3	12	1	1	1	3	6
3	1	2	2	2	1	2	2	15	3	2	3	2	10
1	2	1	2	1	1	2	2	12	1	1	1	1	4
2	2	2	2	2	2	3	3	18	2	2	1	1	6
2	1	2	2	4	1	1	1	14	2	1	1	1	5
2	1	1	3	3	1	1	1	13	1	1	1	1	4
2	1	2	2	2	2	1	2	14	1	1	1	1	4
3	1	2	2	1	1	1	1	12	1	1	1	1	4
3	3	2	1	2	3	1	2	17	2	1	1	1	5
3	3	2	1	3	1	2	5	20	3	3	3	1	10
1	3	2	1	4	3	2	2	18	2	2	2	2	8
2	2	2	2	2	1	1	3	15	2	2	1	1	6
1	1	1	2	1	1	1	1	9	1	1	1	1	4
3	2	2	3	3	1	3	3	20	2	5	2	2	11
3	2	1	2	1	1	1	2	13	5	2	1	1	9
1	2	2	1	3	1	1	2	13	2	2	2	2	8
1	2	2	3	1	2	2	2	15	2	1	1	1	5
1	1	1	1	2	1	2	1	10	1	1	1	1	4
3	3	3	3	3	3	3	3	24	3	3	3	3	12
1	3	2	1	1	2	1	5	16	2	2	1	1	6
3	3	3	3	3	3	3	3	24	3	3	3	3	12
2	1	2	2	1	1	1	2	12	3	2	2	2	9
2	2	2	2	2	2	2	2	16	2	2	2	2	8
2	2	2	2	2	1	1	1	13	1	1	1	1	4
1	1	1	1	3	1	1	1	10	1	1	1	1	4
2	1	1	1	1	1	1	1	9	2	1	1	1	5
1	1	2	1	3	2	1	2	13	1	1	1	1	4
2	2	1	2	1	1	1	2	12	2	1	1	1	5
3	2	2	2	1	1	1	3	15	2	1	2	1	6
1	1	1	1	1	1	1	2	9	1	1	1	1	4
2	1	1	2	2	1	2	2	13	2	1	1	1	5
1	1	2	1	2	1	1	2	11	3	1	1	1	6
2	2	1	2	3	1	1	2	14	2	1	1	1	5
1	1	1	2	1	1	4	4	15	1	1	1	1	4
2	2	1	1	1	1	3	2	13	1	1	1	1	4
1	2	4	3	1	2	1	1	15	1	1	1	1	4
2	2	2	1	1	1	1	2	12	4	1	2	2	9
3	2	3	3	3	3	2	3	22	3	2	2	1	8
1	1	2	2	1	1	1	1	10	1	1	1	1	4
2	1	1	1	2	1	1	1	10	1	1	1	1	4
4	4	4	4	4	4	4	4	32	4	4	4	4	16
1	2	2	2	1	1	2	2	13	1	1	1	1	4
1	1	1	2	2	1	2	2	12	2	1	1	1	5
3	2	4	3	3	2	3	3	23	3	3	3	2	11
2	1	3	3	1	1	3	3	17	4	5	4	5	18
3	2	2	3	1	2	2	4	19	2	2	2	2	8
2	1	2	2	3	1	1	3	15	3	2	3	3	11
3	3	3	3	3	3	3	3	24	3	3	3	3	12
3	3	3	3	3	3	3	3	24	3	3	3	3	12
3	3	3	3	3	3	3	3	24	3	3	3	3	12
3	3	3	3	3	3	3	3	24	3	3	3	3	12
3	3	3	4	4	4	3	4	28	3	3	3	3	12
3	3	3	3	3	3	3	3	24	3	3	3	3	12
2	2	2	2	2	2	2	2	16	1	1	1	1	4
3	3	3	3	3	3	3	3	24	3	3	3	3	12
3	3	4	3	3	3	3	3	25	3	3	3	3	12
1	1	1	1	1	1	1	1	8	2	1	1	1	5
3	3	3	3	3	3	3	3	24	3	3	3	3	12
3	3	3	3	3	3	3	3	24	3	3	3	3	12
2	2	3	2	2	2	1	1	15	1	2	1	1	5
3	1	2	4	3	3	2	3	21	2	2	1	1	6
2	2	2	2	2	2	2	2	16	2	2	2	1	7
2	2	3	1	1	1	1	1	12	1	1	1	1	4
1	1	3	1	1	1	3	1	12	1	1	1	1	4
5	3	3	3	4	3	3	3	27	3	3	3	3	12
2	2	1	1	1	1	1	2	11	1	1	1	1	4
1	2	2	3	4	2	2	2	18	2	1	2	2	7
3	2	2	1	2	1	1	2	14	2	1	1	1	5
1	1	2	1	1	1	2	1	10	1	1	1	1	4
3	2	3	2	3	2	3	2	20	1	1	1	1	4
2	1	1	2	1	1	2	3	13	3	1	1	1	6
2	2	1	1	1	1	1	1	10	1	2	2	2	7
1	1	1	1	1	1	2	3	11	1	1	1	1	4
4	2	3	2	2	2	3	3	21	1	1	1	1	4
3	3	4	3	3	3	4	4	27	4	3	4	4	15
3	3	2	1	3	1	2	3	18	2	1	1	1	5
3	3	3	3	3	3	3	4	25	1	1	1	1	4
4	4	4	4	1	3	3	3	26	3	3	1	1	8
4	3	3	2	5	2	2	3	24	2	1	1	2	6
1	1	4	3	2	1	3	1	16	2	1	1	1	5
2	1	2	3	1	2	2	2	15	1	1	1	1	4
3	2	3	3	3	3	3	3	23	3	3	3	3	12
4	4	2	1	1	2	2	2	18	2	1	1	1	5
1	1	1	1	1	1	1	2	9	2	1	1	1	5
3	3	2	1	2	1	1	2	15	2	1	1	1	5
3	2	2	1	1	1	1	2	13	2	1	1	1	5
3	3	3	2	2	1	2	2	18	2	1	2	1	6
1	1	1	1	2	1	1	1	9	2	1	1	1	5
3	3	3	4	3	3	3	4	26	2	2	2	1	7
3	2	2	2	3	2	2	2	18	2	1	1	1	5
2	1	2	3	1	1	2	1	13	1	1	1	1	4
3	3	2	1	1	1	1	1	13	1	1	1	1	4
1	1	1	3	1	1	1	1	10	1	1	2	1	5
2	2	2	2	2	2	3	3	18	3	3	1	2	9
2	3	2	1	2	1	1	2	14	2	1	1	1	5
3	3	3	3	3	4	3	1	23	1	1	1	1	4
2	3	2	4	2	3	3	4	23	2	1	1	1	5
1	1	1	1	2	1	1	1	9	2	1	1	1	5
3	3	3	3	3	1	1	2	19	2	1	1	1	5
2	1	1	1	2	1	1	1	10	1	1	1	1	4
2	2	2	2	1	2	1	2	14	2	1	1	1	5
3	3	3	3	3	3	3	3	24	1	1	1	1	4
3	3	4	4	4	3	5	3	29	2	1	1	1	5
2	1	2	2	2	1	2	2	14	2	1	1	1	5
3	3	3	3	3	3	3	3	24	3	3	3	3	12
3	2	2	2	3	2	4	3	21	2	2	2	1	7
3	3	5	2	2	2	3	3	23	2	1	1	1	5
4	4	4	4	4	2	2	2	26	1	1	1	1	4
2	2	3	3	4	3	2	2	21	1	1	1	1	4
4	1	3	1	2	1	3	5	20	2	1	1	1	5
4	4	5	4	4	4	5	5	35	2	1	1	1	5
1	2	1	1	1	2	1	1	10	1	1	1	1	4
5	5	4	4	4	4	4	4	34	4	4	4	4	16
3	3	3	2	3	2	1	1	18	3	1	1	1	6
1	2	1	1	1	1	1	1	9	1	1	1	1	4
2	2	2	2	1	1	1	2	13	1	1	1	1	4
4	3	4	4	4	4	2	5	30	2	2	2	1	7
2	2	2	2	2	2	1	2	15	1	1	1	1	4
5	5	3	3	3	3	4	5	31	2	2	4	5	13
4	3	2	3	1	2	2	2	19	2	1	1	1	5
3	3	3	3	3	3	3	2	23	2	1	1	1	5
2	1	1	1	2	1	2	2	12	2	1	1	1	5
1	1	1	1	1	1	1	2	9	1	1	1	1	4
3	2	2	2	1	1	1	2	14	2	1	1	1	5
1	1	1	1	3	1	1	1	10	1	1	1	1	4
3	3	3	3	3	3	1	3	22	1	1	1	1	4
1	2	1	1	1	1	1	1	9	1	1	1	1	4
2	2	2	1	1	1	1	1	11	1	1	1	1	4
4	3	3	2	2	3	3	2	22	1	1	1	1	4
1	1	1	3	1	1	1	1	10	1	1	1	1	4
2	1	1	2	1	1	1	2	11	2	2	2	2	8
2	1	1	2	1	1	2	2	12	2	1	1	1	5
1	1	2	2	2	1	4	3	16	1	1	1	1	4
1	1	1	1	5	2	1	1	13	2	1	1	1	5
2	2	2	2	2	2	1	1	14	1	1	1	1	4
1	1	1	1	2	1	2	1	10	2	1	1	1	5
2	2	1	1	2	1	1	1	11	1	1	1	1	4
2	1	1	1	2	1	2	1	11	1	1	1	1	4
2	2	1	1	1	1	1	1	10	1	1	1	1	4
1	1	1	2	3	1	2	3	14	3	2	2	1	8
2	2	2	3	3	3	3	3	21	3	3	2	1	9
2	2	1	2	1	1	1	2	12	1	1	1	1	4
2	2	1	1	1	1	1	1	10	1	1	1	1	4
2	1	1	1	2	1	2	1	11	1	1	2	1	5
1	3	3	3	3	3	3	3	22	3	3	3	3	12
3	2	1	1	1	1	1	1	11	2	1	1	1	5
2	2	4	1	1	1	2	2	15	2	1	1	1	5
1	2	2	2	2	2	2	2	15	2	2	2	1	7
2	1	1	1	1	1	2	2	11	1	1	1	1	4
2	2	2	2	2	1	2	2	15	2	1	1	1	5
3	3	3	3	3	3	3	3	24	1	1	1	1	4
1	2	1	2	1	1	1	1	10	2	1	2	1	6
1	1	1	2	2	1	1	2	11	2	1	1	1	5
2	2	1	1	1	1	1	2	11	1	1	1	1	4
2	2	2	2	1	2	2	2	15	2	1	2	1	6
3	3	3	3	3	3	3	3	24	3	3	3	3	12
3	3	3	1	3	1	1	3	18	2	1	1	1	5
2	2	2	2	3	2	3	4	20	2	1	2	1	6
3	1	1	2	2	1	1	1	12	1	1	1	1	4
2	1	2	1	2	1	1	2	12	2	1	1	1	5
1	1	1	2	1	1	1	1	9	2	1	1	1	5
2	1	2	1	1	1	1	2	11	3	1	2	1	7
1	1	1	2	1	1	1	1	9	2	2	2	2	8
3	3	3	3	3	3	3	3	24	3	3	3	3	12
3	2	4	4	2	1	2	3	21	2	2	2	1	7
2	2	2	2	2	2	2	3	17	2	2	1	1	6
4	4	4	4	4	4	4	4	32	4	4	4	4	16
2	2	2	2	2	1	2	3	16	2	2	2	2	8
1	1	1	1	1	1	2	1	9	2	1	1	1	5
1	1	1	2	2	1	2	1	11	1	1	1	1	4
1	1	1	1	5	1	1	1	12	3	3	3	1	10
2	2	1	1	1	1	2	1	11	1	1	1	1	4
2	2	2	2	1	1	1	1	12	2	1	1	1	5
2	2	2	3	3	2	3	2	19	1	1	1	1	4
2	2	2	3	1	1	1	2	14	2	1	1	1	5
4	4	4	4	4	4	4	4	32	4	4	4	4	16
3	3	2	2	3	1	1	1	16	2	1	1	1	5
1	1	2	2	3	1	2	2	14	2	2	2	1	7
2	1	1	1	1	1	1	1	9	1	1	1	1	4
1	1	1	2	2	1	2	2	12	2	1	1	1	5
3	3	3	3	3	3	3	3	24	3	3	3	3	12
2	3	3	1	2	2	2	2	17	5	1	1	1	8
2	2	2	2	1	2	2	3	16	2	1	1	1	5
2	1	1	1	1	1	1	1	9	1	1	1	1	4
2	2	3	2	1	1	1	1	13	2	2	1	2	7
2	1	2	1	1	1	1	2	11	1	1	1	1	4
2	2	1	1	1	1	1	2	11	1	1	1	1	4
1	1	2	1	1	1	2	2	11	2	1	1	1	5
2	2	2	3	2	1	2	3	17	2	1	2	1	6
2	2	1	3	2	1	4	3	18	3	2	2	1	8
2	2	3	1	1	1	1	1	12	2	1	1	1	5
2	1	3	2	3	2	1	1	15	2	1	2	2	7
2	1	1	2	1	1	1	2	11	1	1	1	1	4
2	1	1	1	1	1	1	2	10	1	1	1	1	4
2	2	1	1	1	1	2	2	12	1	1	1	1	4
2	2	2	2	1	2	1	1	13	3	3	2	1	9
1	1	1	2	1	1	2	1	10	1	1	1	1	4
2	1	2	3	1	1	2	2	14	2	1	1	1	5
1	2	1	1	1	1	1	1	9	1	1	1	1	4
3	3	3	3	3	3	3	3	24	3	3	3	3	12
1	1	2	2	2	2	2	2	14	3	1	1	2	7
1	1	1	1	1	1	1	1	8	3	1	1	1	6
3	3	4	3	3	1	1	3	21	2	2	1	1	6
1	2	2	1	4	1	1	2	14	1	1	1	1	4
4	4	4	4	4	4	4	4	32	4	4	4	4	16
3	2	1	2	1	1	1	2	13	2	1	1	1	5
3	3	3	3	3	3	2	2	22	1	1	1	1	4
3	3	3	3	4	3	3	3	25	1	1	1	1	4
1	1	1	1	5	1	5	1	16	2	1	1	1	5
3	3	3	3	3	3	3	3	24	3	3	3	3	12
2	3	2	2	2	2	3	3	19	2	2	2	2	8
1	1	1	2	1	1	1	2	10	2	1	1	1	5
2	2	2	2	1	1	2	3	15	2	1	1	1	5
3	2	3	4	2	2	3	3	22	2	3	3	1	9
3	3	3	3	3	3	3	3	24	3	3	3	3	12
2	2	1	2	2	1	4	2	16	2	2	2	1	7
2	2	2	2	2	2	2	2	16	2	2	2	2	8
1	1	2	1	1	1	1	1	9	2	1	1	1	5
2	1	1	2	1	1	2	2	12	1	1	1	1	4
5	5	3	4	1	2	1	5	26	2	2	1	1	6
3	3	3	3	3	3	3	3	24	3	3	3	3	12
2	2	2	2	2	2	2	2	16	2	2	2	2	8
3	3	2	1	1	1	1	2	14	2	1	1	1	5
2	1	4	2	2	2	2	2	17	2	1	1	1	5
3	3	3	3	3	3	3	3	24	3	3	3	3	12
2	2	3	3	3	3	3	3	22	2	2	2	3	9
1	1	1	1	1	1	3	3	12	1	1	1	1	4
1	1	2	2	1	1	1	2	11	3	1	1	1	6
1	1	2	2	1	1	1	1	10	1	1	1	1	4
3	3	3	3	2	3	3	2	22	2	3	2	1	8
1	1	3	1	1	1	1	1	10	1	1	1	1	4
3	3	3	3	3	3	3	3	24	3	3	3	3	12
3	2	2	2	1	1	1	2	14	2	1	2	1	6
2	2	2	2	2	1	2	3	16	1	1	1	1	4
1	1	1	1	1	1	1	1	8	1	1	2	1	5
2	1	1	2	2	1	2	1	12	2	1	1	1	5
1	1	1	1	1	1	1	2	9	2	1	1	2	6
2	1	1	2	1	1	1	1	10	1	1	1	1	4
1	1	1	1	1	1	3	1	10	1	1	1	1	4
4	3	3	3	3	3	3	3	25	3	3	3	3	12
1	3	1	1	1	1	1	1	10	1	1	1	1	4
1	1	1	2	1	1	1	1	9	1	1	1	1	4
2	1	1	1	1	1	1	1	9	1	1	1	1	4
2	2	2	2	2	2	2	3	17	2	1	2	1	6
1	1	3	3	1	1	1	4	15	2	1	1	1	5
3	3	3	3	3	3	3	3	24	2	2	2	2	8
3	3	3	2	1	2	2	4	20	2	1	1	1	5
2	2	2	2	2	2	2	2	16	2	2	2	4	10
1	1	1	2	1	1	1	1	9	1	1	1	1	4
3	3	1	1	1	3	3	3	18	2	2	2	1	7
1	1	2	1	1	1	1	2	10	2	1	2	1	6
4	4	4	4	4	4	4	4	32	4	4	1	4	13
2	1	1	1	1	2	1	2	11	2	1	1	1	5
2	1	1	1	2	1	1	1	10	2	1	1	1	5
1	1	1	2	1	1	1	1	9	2	1	1	1	5
1	1	1	1	5	1	1	1	12	2	1	1	1	5
3	3	2	2	1	1	1	2	15	3	2	2	1	8
1	2	1	1	1	1	1	2	10	2	1	1	1	5
3	2	2	1	1	1	1	2	13	2	1	1	1	5
2	2	1	1	2	1	1	3	13	1	1	1	1	4
2	2	2	2	2	2	2	2	16	2	2	2	2	8
3	3	3	3	3	3	3	3	24	3	3	3	3	12
1	1	4	1	1	1	3	2	14	1	1	1	1	4
3	3	3	3	3	3	3	3	24	3	2	2	2	9
2	2	2	2	1	1	2	2	14	2	1	1	1	5
1	1	2	1	1	1	2	2	11	2	1	1	1	5
2	1	1	1	1	1	1	1	9	1	1	1	1	4
2	1	2	2	2	1	1	1	12	1	1	1	1	4
1	1	3	2	1	1	2	1	12	1	1	1	1	4
3	3	3	3	1	1	1	3	18	3	3	1	1	8
2	2	2	1	1	1	1	1	11	1	1	1	1	4
3	1	2	3	3	3	2	4	21	4	1	1	1	7
3	3	5	5	5	3	1	5	30	3	1	1	1	6
2	1	1	2	2	1	1	2	12	1	2	1	1	5
2	1	2	1	1	1	1	1	10	1	1	1	1	4
1	1	2	1	1	1	1	2	10	2	1	1	1	5
2	1	1	2	1	1	1	1	10	1	1	1	1	4
2	2	1	2	2	2	2	2	15	2	2	1	1	6
2	2	2	2	2	2	2	2	16	3	1	1	1	6
2	1	2	2	2	2	4	2	17	2	2	2	1	7
3	3	3	3	3	3	3	3	24	3	3	2	1	9
2	2	2	2	2	2	2	2	16	2	2	2	2	8
3	3	3	3	3	3	3	3	24	3	3	3	3	12
3	3	3	3	3	3	3	3	24	2	2	2	1	7
2	1	1	1	2	1	1	1	10	1	1	1	1	4
3	2	1	1	3	1	1	1	13	2	1	1	1	5
1	1	2	2	1	1	2	1	11	1	2	2	2	7
4	4	4	4	4	4	4	4	32	4	4	4	4	16
1	1	3	1	5	1	1	1	14	1	1	1	1	4
2	1	1	1	1	1	1	1	9	1	1	1	1	4
2	2	3	2	1	1	2	2	15	1	1	1	1	4
1	1	1	1	1	1	1	1	8	3	1	1	1	6
1	2	3	3	1	1	2	2	15	2	2	1	1	6
2	1	2	1	1	1	1	1	10	2	2	2	2	8
1	1	1	2	1	1	1	1	9	1	1	1	1	4
2	2	2	2	1	1	1	1	12	1	1	1	1	4
1	1	1	1	2	1	2	2	11	2	1	2	1	6
4	4	1	2	3	3	2	5	24	3	2	1	1	7
2	1	2	2	1	1	1	1	11	1	1	1	1	4
3	2	2	2	1	1	1	2	14	2	2	2	2	8
1	1	1	1	1	1	1	1	8	3	3	3	2	11
3	2	3	1	4	3	2	4	22	2	1	2	1	6
3	4	4	4	4	4	4	4	31	3	3	3	3	12
1	1	2	2	1	1	1	1	10	1	1	1	1	4
2	2	2	2	2	2	1	1	14	2	1	1	1	5
4	5	4	3	3	4	4	4	31	4	4	4	4	16
2	2	2	2	2	2	2	2	16	2	2	2	5	11
1	2	2	2	1	1	1	3	13	1	1	1	1	4
3	3	3	1	1	1	3	3	18	2	1	1	1	5
3	3	2	2	1	1	2	2	16	1	1	1	1	4
1	1	1	1	1	1	2	2	10	2	1	1	1	5
3	3	3	3	3	3	3	3	24	3	3	3	3	12
2	1	1	2	2	1	2	2	13	2	1	1	1	5
2	2	2	2	3	2	2	2	17	2	1	1	1	5
2	2	1	1	1	1	1	1	10	1	1	1	1	4
1	3	3	3	3	3	3	2	21	1	1	1	1	4
1	1	3	2	2	1	1	2	13	1	1	1	1	4
3	3	4	3	3	3	3	3	25	1	1	1	1	4
1	1	2	2	1	1	1	1	10	2	1	1	1	5
2	2	2	2	2	2	2	2	16	1	1	1	1	4
2	2	2	2	2	2	1	2	15	1	1	1	1	4
1	1	2	1	1	1	1	1	9	3	3	1	1	8
2	2	2	2	2	2	2	2	16	2	2	2	2	8
3	4	3	2	3	2	3	3	23	2	1	2	1	6
1	1	1	1	1	1	1	1	8	2	1	1	1	5
3	3	1	1	3	3	2	2	18	2	1	1	1	5
2	1	1	1	2	1	1	1	10	1	1	1	1	4
2	2	2	2	2	2	2	3	17	1	2	2	1	6
3	2	1	1	2	1	1	2	13	1	1	1	1	4
3	3	3	3	3	3	3	3	24	3	3	3	3	12
3	1	1	1	1	1	1	1	10	1	1	1	1	4
2	1	2	2	2	2	2	2	15	2	1	2	1	6
3	3	3	3	3	3	3	3	24	3	3	3	3	12
3	3	3	3	3	3	3	3	24	3	3	3	3	12
1	2	3	3	1	1	1	2	14	5	1	1	1	8
2	2	2	3	3	3	3	3	21	3	2	2	1	8
4	3	3	3	3	3	3	3	25	3	3	3	3	12
1	1	3	2	4	3	2	2	18	2	2	1	1	6
2	1	1	1	1	1	2	2	11	1	1	1	1	4
3	1	3	2	1	1	2	2	15	2	1	1	1	5
2	1	1	2	2	2	2	2	14	2	2	2	1	7
1	1	1	1	1	1	2	2	10	2	1	1	1	5
1	1	2	1	2	1	1	1	10	1	1	1	1	4
3	3	2	2	1	1	1	1	14	2	1	1	1	5
2	1	1	1	1	1	1	1	9	1	1	1	1	4
2	1	2	2	1	1	1	1	11	1	1	1	1	4
3	1	3	1	1	1	1	1	12	2	1	1	2	6
3	3	3	3	3	3	3	3	24	3	3	3	3	12
4	2	5	2	1	1	5	3	23	4	4	2	3	13
1	1	1	1	2	1	4	3	14	2	1	1	1	5
1	1	1	1	2	1	1	1	9	1	1	1	1	4
3	2	1	1	4	1	1	1	14	1	1	1	1	4
2	1	1	1	1	1	1	2	10	2	1	1	1	5
3	1	2	2	2	1	1	3	15	2	1	1	1	5
4	4	2	3	2	2	2	2	21	1	1	1	1	4
4	2	4	1	1	1	1	1	15	1	1	1	1	4
2	2	2	2	2	2	2	2	16	2	2	2	2	8
1	1	2	2	1	1	1	2	11	2	1	1	1	5
1	1	1	2	2	1	2	1	11	2	1	1	1	5
2	1	2	1	1	1	1	1	10	1	1	1	1	4
2	1	3	4	3	5	4	5	27	1	2	2	1	6
3	3	3	3	3	3	2	2	22	2	2	2	2	8
1	1	1	1	1	1	2	3	11	2	2	2	3	9
1	1	4	3	2	1	2	4	18	2	1	1	2	6
2	1	1	2	1	1	1	3	12	2	2	2	2	8
3	1	2	1	1	1	5	4	18	2	2	2	1	7
3	2	1	1	1	1	1	1	11	2	1	1	1	5
3	2	1	2	1	2	2	2	15	3	1	3	2	9
2	2	2	1	2	1	2	1	13	2	1	1	1	5
2	2	3	1	1	1	2	1	13	3	3	4	3	13
2	2	3	1	2	2	2	3	17	2	1	1	1	5
3	3	3	3	3	3	4	3	25	2	3	1	1	7
4	4	1	1	3	2	3	4	22	2	2	2	1	7
1	1	1	2	2	2	1	2	12	2	2	1	2	7
1	1	3	1	1	1	1	2	11	1	1	1	1	4
3	3	2	3	3	3	2	3	22	2	1	1	1	5
1	1	1	1	1	1	2	1	9	1	1	1	1	4
1	1	2	1	1	1	1	1	9	2	1	1	1	5
2	1	2	1	1	1	1	1	10	2	1	1	1	5
1	1	1	1	1	1	1	1	8	2	1	1	1	5
3	3	3	3	3	3	3	3	24	3	3	3	3	12
2	2	2	1	2	2	1	3	15	2	1	1	1	5
1	1	1	1	1	1	1	1	8	2	1	2	1	6
3	3	3	3	3	3	3	3	24	3	3	3	3	12
3	3	3	3	3	3	3	3	24	3	3	3	3	12
3	2	4	2	3	3	2	2	21	1	1	1	1	4
1	1	1	1	2	1	3	1	11	1	1	1	1	4
2	2	3	3	3	3	2	3	21	3	3	3	3	12
1	1	1	1	2	1	1	1	9	1	1	1	1	4
1	1	1	2	2	2	2	2	13	2	2	1	1	6
2	2	2	3	3	1	2	3	18	2	1	2	1	6
3	3	2	1	1	1	4	2	17	3	1	2	1	7
4	3	3	3	3	3	3	3	25	2	1	2	1	6
1	1	1	1	1	1	1	1	8	2	1	1	1	5
1	1	3	2	1	1	1	2	12	1	1	1	1	4
2	1	1	1	2	1	2	1	11	1	1	1	1	4
3	3	3	3	3	3	3	3	24	2	2	2	1	7
1	1	2	1	1	1	1	1	9	1	1	1	1	4
2	2	1	2	2	1	1	1	12	1	1	1	1	4
3	2	3	3	2	2	2	2	19	2	3	2	1	8
3	3	3	3	3	3	3	3	24	3	4	1	1	9
1	1	1	1	2	1	1	2	10	2	1	1	1	5
4	4	5	4	2	2	1	2	24	2	1	1	2	6
2	1	2	1	4	3	5	3	21	2	1	1	1	5
3	3	3	3	3	3	3	3	24	2	1	1	1	5
1	1	1	2	1	1	1	4	12	2	1	1	1	5
2	2	4	2	3	2	2	2	19	1	1	1	1	4
2	3	3	4	2	1	1	4	20	2	2	1	1	6
1	1	1	1	1	1	1	1	8	2	1	1	1	5
2	2	3	2	2	1	2	2	16	2	1	1	1	5
1	1	1	2	1	1	1	1	9	1	1	1	1	4
3	4	2	2	2	1	2	3	19	1	1	1	1	4
1	2	3	3	2	2	2	2	17	2	2	1	1	6
2	2	1	2	1	2	2	2	14	2	1	2	2	7
1	1	1	1	1	1	1	1	8	2	2	2	1	7
3	1	1	1	1	1	1	1	10	1	1	1	1	4
2	2	2	2	2	1	1	1	13	2	2	1	1	6
3	1	3	3	1	1	2	3	17	2	1	1	1	5
4	4	4	4	4	4	4	4	32	4	4	1	1	10
3	3	3	3	2	3	3	3	23	3	3	3	3	12
2	2	2	1	1	1	1	1	11	1	1	1	1	4
3	2	2	2	1	1	1	3	15	1	1	1	1	4
3	3	3	3	3	2	3	3	23	1	2	2	2	7
2	2	3	2	1	1	1	2	14	2	1	1	1	5
3	3	2	1	2	1	3	3	18	2	1	1	1	5
3	3	3	3	3	3	3	3	24	3	3	3	3	12
3	1	3	1	1	1	1	1	12	1	1	1	1	4
3	2	3	3	3	3	1	1	19	1	1	1	1	4
2	2	3	3	2	3	1	2	18	2	2	2	2	8
3	3	3	3	3	3	3	3	24	3	1	2	2	8
2	1	2	1	2	1	1	1	11	2	1	1	2	6
1	1	1	2	1	1	2	2	11	2	2	1	1	6
1	1	1	2	4	1	2	2	14	1	2	1	2	6
1	1	1	1	1	1	1	1	8	3	1	1	1	6
4	3	3	3	3	3	3	3	25	3	3	3	3	12
3	3	4	2	2	1	5	3	23	5	1	1	1	8
1	1	1	1	1	1	2	2	10	2	1	2	1	6
3	3	3	3	3	3	3	3	24	1	1	1	1	4
2	1	1	1	1	1	1	1	9	1	1	1	1	4
1	1	2	1	2	1	1	1	10	1	1	1	1	4
2	2	3	3	2	2	2	2	18	2	2	2	2	8
1	1	3	1	1	1	1	1	10	2	1	1	1	5
3	2	4	4	3	2	2	3	23	3	2	2	2	9
2	2	2	2	1	1	2	1	13	2	1	1	1	5
1	1	1	1	1	1	1	1	8	1	5	1	1	8
3	2	3	2	2	2	2	3	19	2	1	1	1	5
4	4	3	3	3	3	3	3	26	3	3	3	3	12
2	1	1	1	1	1	1	1	9	2	1	1	1	5
4	4	4	4	5	5	5	5	36	5	5	5	5	20
2	2	2	2	2	2	1	1	14	1	1	2	2	6
2	1	5	1	1	1	1	1	13	2	1	1	1	5
3	3	3	3	3	3	3	3	24	3	3	3	3	12
1	1	1	1	3	1	1	1	10	1	2	2	1	6
5	3	5	1	5	3	1	2	25	2	1	2	1	6
3	3	2	2	1	1	1	1	14	2	1	1	1	5
3	2	2	1	1	1	1	3	14	1	1	1	1	4
2	2	2	2	2	2	5	3	20	1	1	1	1	4
1	2	1	2	2	1	1	1	11	3	1	1	1	6
1	1	1	3	3	1	3	2	15	2	2	1	2	7
2	1	2	1	1	1	2	2	12	1	1	1	1	4
3	5	3	2	3	1	1	1	19	1	1	1	1	4
2	2	1	2	1	1	2	3	14	1	1	1	1	4
1	1	1	1	1	1	1	1	8	2	2	2	2	8
1	2	1	1	1	1	1	1	9	1	1	1	1	4
2	2	2	2	2	2	2	2	16	2	2	2	2	8
2	3	3	3	3	3	3	3	23	3	3	3	3	12
3	3	3	3	3	3	1	3	22	3	3	1	1	8
3	3	3	3	3	3	3	3	24	3	3	3	3	12
3	3	2	2	2	2	2	3	19	3	1	1	1	6
2	2	2	1	1	2	2	2	14	2	2	2	1	7
2	1	1	1	1	1	1	1	9	1	1	1	1	4
2	1	1	1	1	1	1	1	9	1	1	1	1	4
3	2	5	5	1	1	2	2	21	2	2	2	2	8
2	2	1	1	2	1	2	2	13	2	2	2	2	8
3	3	3	3	1	1	1	1	16	1	1	1	1	4
2	1	1	2	1	1	1	2	11	1	1	1	1	4
4	1	1	1	3	3	3	3	19	3	3	3	3	12
3	3	3	3	1	2	2	2	19	2	2	2	2	8
3	1	2	1	1	1	2	3	14	2	1	2	1	6
3	3	3	2	5	2	1	2	21	1	1	1	1	4
2	2	2	2	2	2	2	2	16	2	2	2	2	8
1	1	1	1	3	1	3	3	14	1	2	2	1	6
3	2	3	2	3	3	3	2	21	3	2	3	1	9
3	2	2	2	2	1	2	2	16	2	2	1	1	6
2	1	1	2	1	1	1	1	10	1	1	1	1	4
3	1	1	1	1	1	1	3	12	3	1	2	1	7
5	4	2	2	2	1	1	3	20	3	1	1	1	6
3	3	3	3	3	3	2	3	23	4	2	2	2	10
3	3	1	3	3	1	3	1	18	1	1	1	1	4
1	1	2	1	1	1	1	1	9	1	2	1	1	5
3	3	2	2	1	1	1	1	14	2	1	1	1	5
1	1	1	1	3	1	1	1	10	1	1	1	1	4
2	2	1	3	2	1	1	3	15	3	1	1	2	7
3	3	3	3	3	3	3	3	24	3	3	3	3	12
3	2	2	2	4	1	1	1	16	2	1	2	1	6
2	1	1	1	1	1	1	1	9	2	1	1	1	5
2	1	1	1	2	1	1	2	11	2	1	1	1	5
2	1	2	1	1	1	2	1	11	1	1	1	1	4
3	1	3	3	3	1	3	3	20	2	1	1	1	5
1	1	1	2	1	1	1	1	9	2	1	1	1	5
3	1	1	1	2	1	3	2	14	2	1	2	1	6
2	3	3	3	3	3	3	3	23	2	1	1	1	5
3	3	3	3	3	3	3	3	24	3	3	3	3	12
1	1	1	1	2	1	1	1	9	1	1	1	1	4
2	1	2	2	1	1	1	2	12	2	2	1	1	6
1	1	2	1	1	1	1	1	9	1	1	1	1	4
2	2	2	2	2	2	2	2	16	2	2	2	2	8
1	1	1	1	1	1	1	1	8	2	1	1	1	5
2	3	1	1	2	1	2	2	14	1	1	1	1	4
3	3	2	2	2	1	1	2	16	2	1	1	1	5
3	2	2	4	1	2	4	3	21	2	1	2	2	7

## Sheet: MAPI
S1	S2	S3	S4	S5	S6	S7	inability to control carving	S8	S9	S10	S11	S12	feeling anxious and lost	S13	S14	S15	withdrawal or escape	S16	S17	productivity loss
3	3	3	3	3	3	3	21	3	3	3	3	3	15	3	3	3	9	3	3	6
3	3	3	3	3	3	3	21	3	3	3	3	3	15	3	3	3	9	3	3	6
1	1	1	2	2	1	1	9	1	1	1	1	1	5	1	1	1	3	1	1	2
1	2	1	2	2	2	2	12	2	2	2	2	2	10	2	2	2	6	2	2	4
1	1	1	2	1	2	2	10	2	3	3	3	3	14	3	3	3	9	3	3	6
2	2	2	2	2	2	2	14	2	2	2	2	2	10	2	2	2	6	1	2	3
3	3	2	1	3	3	3	18	3	3	3	3	3	15	3	3	3	9	3	3	6
3	3	3	3	3	3	3	21	3	3	3	3	3	15	3	3	3	9	3	3	6
2	1	2	2	2	2	3	14	2	2	2	1	1	8	2	2	4	8	2	2	4
1	1	1	1	4	2	4	14	2	5	2	5	5	19	5	5	5	15	1	1	2
2	2	2	1	2	2	3	14	3	4	3	4	3	17	2	3	3	8	2	2	4
3	3	3	3	4	3	3	22	3	4	3	3	4	17	3	3	3	9	3	3	6
2	2	1	1	3	3	2	14	4	4	3	4	4	19	3	3	4	10	2	2	4
1	2	2	1	1	4	1	12	4	2	4	4	2	16	4	2	4	10	4	4	8
3	3	3	3	3	3	3	21	3	3	3	3	3	15	3	3	3	9	3	3	6
1	1	1	1	1	1	2	8	2	4	1	2	3	12	2	2	2	6	2	2	4
2	1	1	1	1	1	1	8	3	4	4	4	4	19	2	2	3	7	1	1	2
3	3	2	1	3	2	3	17	4	5	3	3	4	19	2	3	4	9	3	2	5
1	1	1	1	1	1	1	7	1	1	1	1	1	5	2	2	3	7	2	2	4
2	2	1	1	1	1	3	11	5	3	3	2	2	15	2	2	2	6	2	2	4
2	2	3	3	4	4	5	23	5	4	4	4	4	21	3	4	4	11	3	3	6
3	4	4	4	4	3	4	26	3	3	3	3	3	15	3	3	4	10	3	3	6
4	4	3	4	3	3	3	24	3	3	3	3	3	15	4	3	4	11	3	4	7
1	1	1	1	1	1	1	7	1	1	1	1	1	5	1	1	1	3	1	2	3
2	1	1	2	1	1	1	9	1	1	1	1	1	5	1	1	1	3	1	1	2
1	1	1	1	3	1	1	9	2	3	1	1	1	8	3	3	3	9	2	2	4
1	1	1	4	3	3	2	15	2	5	3	2	2	14	2	2	4	8	2	3	5
2	2	1	1	3	2	3	14	4	4	4	4	4	20	2	3	3	8	3	2	5
1	1	1	2	4	3	3	15	4	5	4	4	4	21	1	1	2	4	1	1	2
2	2	2	2	2	2	2	14	2	2	2	1	2	9	2	2	2	6	1	1	2
3	3	3	3	3	3	3	21	3	3	3	3	3	15	3	3	3	9	3	3	6
1	3	1	1	5	5	5	21	5	5	5	5	5	25	5	3	3	11	3	3	6
2	2	1	2	4	2	1	14	2	1	2	1	2	8	4	4	3	11	3	3	6
1	1	1	1	2	1	2	9	2	1	1	1	1	6	3	3	2	8	1	1	2
1	1	1	2	2	2	2	11	5	5	2	2	4	18	2	2	4	8	1	1	2
2	2	3	2	2	2	2	15	2	2	2	2	2	10	1	2	1	4	2	1	3
3	3	3	3	3	3	3	21	3	3	3	3	3	15	3	3	3	9	3	3	6
2	1	1	3	2	3	2	14	5	5	1	1	4	16	1	2	2	5	1	1	2
1	1	1	1	1	1	1	7	1	1	1	1	1	5	4	4	4	12	1	2	3
2	2	2	2	2	3	3	16	3	3	2	2	2	12	2	2	3	7	2	2	4
1	2	1	2	3	1	2	12	4	4	4	2	4	18	2	2	4	8	2	2	4
2	2	2	1	3	2	2	14	1	4	1	1	1	8	1	4	3	8	1	2	3
1	1	1	1	1	1	2	8	3	3	1	1	2	10	1	1	3	5	2	2	4
1	1	1	1	4	2	3	13	2	4	1	1	1	9	1	1	4	6	1	1	2
3	1	2	2	4	3	4	19	2	4	2	2	3	13	3	3	3	9	3	3	6
3	3	3	3	3	3	3	21	3	3	3	3	3	15	3	3	3	9	3	3	6
1	2	1	1	4	3	3	15	1	5	2	2	2	12	3	3	5	11	2	3	5
1	1	1	1	1	1	2	8	2	2	2	2	2	10	2	3	4	9	2	2	4
3	3	3	3	3	3	3	21	3	3	3	3	3	15	3	3	3	9	3	3	6
2	1	1	2	3	3	2	14	2	5	3	5	3	18	1	2	3	6	3	3	6
1	1	1	2	2	3	2	12	5	5	4	3	3	20	2	4	3	9	3	3	6
1	1	1	1	2	1	2	9	2	4	3	3	3	15	3	3	3	9	2	2	4
1	1	1	2	2	1	1	9	1	5	2	2	2	12	1	1	1	3	1	1	2
1	1	1	1	1	1	2	8	3	3	2	2	2	12	1	2	3	6	1	1	2
2	3	1	2	4	3	2	17	3	4	3	3	4	17	2	3	3	8	2	3	5
3	3	1	1	3	3	3	17	3	3	3	3	3	15	3	3	3	9	3	3	6
4	2	2	1	4	3	2	18	3	5	2	2	2	14	1	1	2	4	1	3	4
2	1	2	2	2	4	3	16	5	5	5	5	5	25	1	1	4	6	3	1	4
2	2	1	1	1	2	2	11	2	2	3	3	2	12	2	3	3	8	2	2	4
2	1	1	4	4	2	2	16	5	5	5	4	3	22	2	2	2	6	4	2	6
1	1	1	1	1	1	1	7	1	1	1	1	1	5	1	2	3	6	1	1	2
2	2	1	1	3	3	3	15	5	5	4	4	3	21	2	4	3	9	2	3	5
4	4	2	2	4	4	2	22	2	2	2	2	2	10	3	3	2	8	4	4	8
3	3	3	3	3	3	3	21	3	3	3	2	2	13	3	3	3	9	3	3	6
2	2	1	1	1	1	3	11	3	5	3	3	3	17	1	1	2	4	1	1	2
3	3	3	3	3	3	3	21	3	3	3	3	3	15	3	3	3	9	3	3	6
2	1	1	1	1	1	1	8	4	5	3	3	4	19	1	1	1	3	1	1	2
4	4	2	3	3	2	4	22	4	3	4	4	5	20	2	4	4	10	4	4	8
1	1	1	1	1	1	1	7	3	3	1	1	2	10	1	2	2	5	1	1	2
1	1	1	2	2	2	4	13	3	4	2	2	3	14	2	3	3	8	3	2	5
2	2	1	1	1	2	2	11	1	2	2	1	1	7	3	3	2	8	2	1	3
3	3	3	3	3	3	2	20	2	2	2	1	1	8	1	1	1	3	1	1	2
2	1	1	2	2	2	2	12	3	4	3	3	3	16	3	3	3	9	1	2	3
1	2	1	1	2	1	2	10	4	5	2	1	1	13	1	1	2	4	2	2	4
1	1	1	2	1	1	2	9	3	3	1	1	1	9	1	1	1	3	1	2	3
3	3	3	3	3	3	3	21	3	5	3	4	4	19	3	3	3	9	3	3	6
1	1	1	1	2	1	1	8	5	5	2	4	4	20	3	1	5	9	4	1	5
2	1	1	3	2	2	2	13	3	5	4	4	4	20	2	2	2	6	2	2	4
1	1	1	1	1	1	1	7	3	4	4	1	5	17	1	1	2	4	4	3	7
1	1	1	1	1	1	1	7	1	1	1	1	1	5	1	2	1	4	1	1	2
1	2	2	1	3	3	3	15	3	2	1	2	3	11	1	1	2	4	2	1	3
2	1	2	1	1	1	1	9	2	5	1	1	3	12	2	2	2	6	2	1	3
1	1	1	5	5	1	1	15	1	5	1	1	1	9	1	1	1	3	1	1	2
3	3	2	1	3	4	2	18	5	5	5	4	5	24	3	2	5	10	5	5	10
1	1	1	1	1	2	2	9	3	3	3	2	2	13	3	3	4	10	2	2	4
2	2	1	4	4	4	2	19	4	1	4	4	3	16	1	1	4	6	1	1	2
2	3	3	1	3	3	3	18	5	5	5	5	3	23	3	3	3	9	2	2	4
3	1	1	2	3	3	3	16	5	5	5	5	5	25	3	3	5	11	3	3	6
1	1	1	1	3	3	2	12	1	1	4	4	5	15	3	5	5	13	5	4	9
2	2	2	2	2	2	2	14	5	3	3	3	3	17	3	3	3	9	3	3	6
2	1	1	1	1	1	3	10	2	1	1	1	2	7	2	2	2	6	2	2	4
3	3	2	2	2	2	2	16	5	5	5	5	5	25	5	4	3	12	3	3	6
2	1	1	1	2	2	1	10	5	5	4	3	3	20	1	1	2	4	1	1	2
5	4	4	4	4	4	4	29	4	4	4	4	4	20	4	4	4	12	4	4	8
2	2	3	3	3	3	3	19	3	3	3	3	3	15	3	3	3	9	3	3	6
3	3	3	3	3	3	3	21	3	3	3	3	3	15	3	3	3	9	3	3	6
1	2	2	1	4	3	4	17	5	5	2	4	5	21	1	4	4	9	1	1	2
3	1	1	3	3	3	3	17	5	3	1	1	3	13	2	5	5	12	1	1	2
1	1	1	1	2	1	1	8	4	4	1	1	2	12	1	1	2	4	1	1	2
3	2	1	1	3	2	3	15	4	5	4	5	3	21	4	5	3	12	1	2	3
1	1	1	1	1	1	2	8	1	2	1	1	2	7	2	3	3	8	1	2	3
1	1	1	2	2	2	2	11	2	3	1	2	5	13	3	3	3	9	3	1	4
3	3	1	1	2	2	2	14	5	5	3	3	3	19	3	3	3	9	1	2	3
2	2	1	1	2	2	2	12	4	1	2	3	2	12	3	3	2	8	1	2	3
2	2	1	2	3	3	1	14	5	1	3	4	3	16	2	2	4	8	3	3	6
1	1	1	1	1	1	1	7	2	1	2	1	1	7	2	2	1	5	1	1	2
2	2	1	1	5	4	2	17	2	4	4	4	3	17	2	2	3	7	3	3	6
1	1	1	1	1	1	1	7	5	5	3	5	5	23	3	2	4	9	1	1	2
2	1	1	1	2	2	2	11	2	5	4	4	5	20	3	3	3	9	3	2	5
3	2	3	1	3	2	1	15	4	4	4	3	4	19	1	1	2	4	1	1	2
1	1	1	1	1	1	1	7	1	1	1	1	1	5	1	1	2	4	1	1	2
2	1	1	3	2	1	1	11	3	1	4	5	2	15	1	1	1	3	1	2	3
1	1	1	1	1	1	1	7	1	5	1	1	5	13	1	1	5	7	1	1	2
1	1	1	1	1	1	1	7	1	5	1	1	2	10	1	1	2	4	2	1	3
1	3	1	1	3	5	3	17	3	2	1	1	3	10	1	3	3	7	3	1	4
2	2	2	1	2	2	2	13	2	2	1	2	2	9	2	2	2	6	1	1	2
1	1	1	1	1	1	1	7	2	2	1	1	2	8	2	3	2	7	1	2	3
1	1	1	1	1	1	1	7	1	1	1	1	1	5	3	3	3	9	3	3	6
1	1	1	1	1	1	2	8	2	2	2	2	2	10	1	1	1	3	1	1	2
1	1	1	1	1	1	1	7	2	5	1	1	5	14	2	2	2	6	4	2	6
2	2	1	3	2	3	3	16	4	5	4	4	3	20	1	1	2	4	1	2	3
3	1	1	1	2	2	1	11	4	2	3	2	3	14	1	1	2	4	1	1	2
1	1	1	1	1	1	5	11	4	5	5	4	3	21	1	1	5	7	1	1	2
2	1	1	1	1	1	2	9	2	4	3	2	2	13	2	2	3	7	1	1	2
3	3	2	2	3	4	2	19	3	5	5	5	5	23	4	4	3	11	2	2	4
4	4	4	4	4	5	3	28	5	3	5	3	5	21	4	5	5	14	5	5	10
1	2	2	2	3	3	2	15	4	5	2	2	3	16	4	3	4	11	3	3	6
1	1	1	1	1	3	3	11	5	5	3	5	5	23	3	3	3	9	1	1	2
1	1	1	1	1	1	1	7	2	5	3	3	5	18	2	2	2	6	3	3	6
1	1	1	1	2	2	2	10	2	2	1	1	1	7	1	1	1	3	1	1	2
1	1	1	1	1	1	1	7	1	1	1	1	1	5	1	1	1	3	1	2	3
2	1	1	2	2	2	1	11	1	1	1	1	1	5	1	1	3	5	2	1	3
2	1	1	2	3	2	1	12	3	3	2	3	4	15	3	3	2	8	1	1	2
3	2	3	3	2	3	3	19	2	3	2	3	3	13	3	2	3	8	4	4	8
1	1	1	1	1	1	1	7	2	2	2	2	3	11	2	2	2	6	1	1	2
1	1	1	1	1	1	1	7	3	5	5	4	4	21	3	5	3	11	3	5	8
1	1	1	1	3	2	2	11	5	5	5	5	5	25	1	1	5	7	1	1	2
2	1	1	1	3	2	2	12	4	1	5	5	5	20	2	2	4	8	1	1	2
2	2	2	1	2	2	2	13	2	2	2	2	2	10	2	2	2	6	2	2	4
1	1	1	2	2	2	2	11	4	5	4	4	4	21	1	1	4	6	3	1	4
1	1	1	1	2	2	2	10	2	2	2	2	2	10	3	3	3	9	3	1	4
1	1	1	1	2	1	3	10	1	4	2	2	5	14	1	1	3	5	2	1	3
1	1	1	1	2	1	2	9	3	3	3	4	4	17	3	3	3	9	2	3	5
1	2	1	1	3	3	3	14	3	1	1	1	3	9	4	4	3	11	1	2	3
1	1	1	1	1	1	1	7	3	5	2	2	1	13	1	3	3	7	1	1	2
3	4	3	1	2	4	1	18	5	5	5	5	5	25	2	2	5	9	2	2	4
1	1	1	2	2	2	2	11	3	2	2	1	2	10	2	2	1	5	1	2	3
2	2	1	1	3	3	2	14	2	4	3	4	4	17	3	3	3	9	3	4	7
1	1	1	2	2	2	2	11	2	2	2	4	1	11	1	3	3	7	3	3	6
1	1	1	1	2	3	1	10	5	5	3	2	5	20	5	5	5	15	5	5	10
1	1	1	1	1	1	1	7	5	5	4	5	5	24	3	3	4	10	3	3	6
1	1	1	1	1	1	1	7	2	5	3	1	2	13	3	3	3	9	1	1	2
1	2	1	1	2	1	1	9	5	5	5	5	5	25	2	1	3	6	2	2	4
1	1	1	1	1	1	2	8	5	3	1	1	5	15	5	5	5	15	2	2	4
2	2	1	2	2	3	1	13	5	2	1	1	1	10	1	2	1	4	2	2	4
3	3	3	3	3	3	3	21	3	3	3	3	3	15	3	3	3	9	3	3	6
3	1	1	1	2	3	2	13	2	4	2	2	2	12	1	1	2	4	4	3	7
1	1	1	1	1	1	1	7	1	1	1	1	4	8	1	3	4	8	1	1	2
4	4	3	1	4	4	3	23	2	4	2	2	4	14	4	3	4	11	3	3	6
1	1	1	1	2	1	1	8	1	5	1	2	3	12	1	2	2	5	1	1	2
2	2	2	2	2	2	2	14	2	2	2	2	2	10	2	2	2	6	2	2	4
2	2	1	1	2	2	2	12	2	2	1	2	3	10	1	1	2	4	1	1	2
3	3	3	3	3	3	3	21	3	3	3	3	3	15	3	3	3	9	3	3	6
1	1	1	2	2	1	2	10	1	2	1	1	2	7	1	1	1	3	1	1	2
1	2	2	1	1	2	1	10	1	5	1	1	1	9	1	1	4	6	1	1	2
2	1	1	1	2	2	3	12	2	1	2	3	4	12	2	1	2	5	1	1	2
1	1	1	1	1	1	1	7	2	1	1	1	1	6	1	1	2	4	1	1	2
2	1	1	2	3	2	2	13	3	5	2	2	2	14	3	3	4	10	2	2	4
1	1	1	1	3	1	1	9	5	5	5	5	5	25	5	5	5	15	5	2	7
2	1	1	1	4	3	4	16	3	5	2	3	5	18	1	1	2	4	2	2	4
1	1	1	1	1	1	1	7	1	1	1	4	3	10	2	3	3	8	2	1	3
1	1	1	1	1	1	1	7	2	2	1	1	1	7	1	1	1	3	1	1	2
1	2	1	2	3	3	3	15	2	2	1	2	2	9	2	2	2	6	1	1	2
2	3	2	2	3	4	2	18	4	5	5	5	4	23	3	3	3	9	2	2	4
2	1	1	1	2	1	1	9	2	1	2	2	1	8	1	1	1	3	1	1	2
1	2	1	1	2	2	2	11	4	5	4	3	4	20	2	1	4	7	2	1	3
3	3	3	3	3	3	3	21	3	3	3	3	3	15	3	3	3	9	3	3	6
1	1	1	1	1	1	1	7	3	5	3	3	3	17	3	3	3	9	3	3	6
2	2	2	2	3	3	2	16	3	1	4	4	4	16	2	1	2	5	2	4	6
2	1	1	1	1	1	2	9	1	1	1	2	2	7	3	3	3	9	3	3	6
1	1	1	1	1	1	1	7	1	1	1	1	1	5	1	2	2	5	2	3	5
1	1	1	1	2	1	1	8	2	3	1	1	1	8	1	1	3	5	1	1	2
1	1	1	2	3	2	3	13	3	3	1	1	1	9	1	2	3	6	1	1	2
2	2	1	1	3	2	3	14	3	4	2	2	4	15	3	3	2	8	1	1	2
1	1	1	3	3	3	3	15	3	3	3	3	3	15	3	3	3	9	3	3	6
1	1	1	1	1	1	1	7	5	3	3	3	3	17	3	3	3	9	3	3	6
1	2	1	2	2	2	3	13	3	5	3	2	2	15	2	2	2	6	2	2	4
1	1	1	2	2	2	1	10	2	2	2	2	2	10	2	2	2	6	2	2	4
2	2	2	1	2	1	1	11	3	2	1	1	3	10	1	2	2	5	2	1	3
1	1	1	1	1	1	1	7	2	2	1	1	1	7	1	1	1	3	1	1	2
4	4	4	4	4	4	4	28	4	4	4	4	4	20	4	4	4	12	4	4	8
1	2	2	1	2	2	2	12	3	5	4	4	3	19	2	2	3	7	2	1	3
1	1	1	1	2	1	1	8	5	5	5	5	5	25	1	1	3	5	2	2	4
2	2	2	3	3	3	3	18	4	4	5	5	5	23	5	5	4	14	3	4	7
2	2	2	1	3	2	2	14	3	2	2	3	2	12	2	2	2	6	2	2	4
2	1	1	2	2	1	2	11	4	5	5	5	5	24	3	3	4	10	2	3	5
1	1	1	1	1	1	3	9	2	1	1	1	1	6	1	1	1	3	1	1	2
1	1	1	1	2	1	1	8	1	1	1	1	1	5	1	1	2	4	1	1	2
2	1	1	1	1	1	1	8	3	3	3	2	3	14	2	2	2	6	1	1	2
1	1	1	2	1	1	1	8	2	1	1	1	5	10	1	2	1	4	1	1	2
3	3	3	3	3	3	3	21	3	3	3	3	3	15	3	3	3	9	3	3	6
1	1	1	2	2	2	1	10	1	1	1	1	1	5	1	1	2	4	1	1	2
2	2	1	1	4	2	1	13	2	2	1	1	2	8	1	1	1	3	2	3	5
2	2	2	2	2	3	2	15	2	2	2	2	4	12	2	2	2	6	2	2	4
3	2	2	2	2	2	2	15	3	2	2	2	3	12	2	3	2	7	2	2	4
2	1	1	2	2	3	3	14	5	5	3	2	3	18	1	1	3	5	1	1	2
1	1	1	1	3	3	2	12	3	3	2	2	1	11	1	1	3	5	1	1	2
2	2	1	2	2	3	2	14	4	5	4	5	4	22	2	3	4	9	3	3	6
1	1	1	1	3	2	2	11	2	2	1	1	3	9	1	1	1	3	1	2	3
1	1	1	1	1	1	1	7	1	1	1	1	1	5	1	1	3	5	1	1	2
1	1	1	1	1	1	1	7	5	5	2	1	2	15	2	2	2	6	2	1	3
2	1	1	1	1	1	1	8	2	1	1	1	2	7	1	2	1	4	1	1	2
1	1	1	1	2	2	2	10	3	1	3	1	3	11	3	3	3	9	2	1	3
1	1	1	3	1	1	1	9	3	5	1	1	5	15	1	1	1	3	1	1	2
2	2	1	1	2	2	1	11	5	5	5	5	2	22	1	1	2	4	1	1	2
1	1	1	1	3	2	3	12	2	3	2	2	4	13	3	3	4	10	3	2	5
3	3	3	3	3	3	3	21	3	3	3	3	3	15	3	3	3	9	3	3	6
3	2	1	1	4	1	1	13	5	5	1	1	2	14	3	3	3	9	1	1	2
2	1	1	1	3	2	2	12	3	4	3	2	2	14	2	2	4	8	2	3	5
3	1	1	1	4	4	4	18	3	4	3	2	3	15	4	4	4	12	4	4	8
3	3	3	3	3	3	3	21	3	3	3	3	3	15	3	3	3	9	3	3	6
3	4	3	3	3	3	3	22	3	3	3	3	3	15	3	3	3	9	3	3	6
1	1	1	1	1	1	1	7	2	1	1	1	5	10	3	3	1	7	1	1	2
2	1	1	2	3	2	2	13	3	2	2	2	2	11	2	1	2	5	2	1	3
2	2	1	2	2	2	1	12	5	5	2	2	1	15	1	2	2	5	1	1	2
1	1	1	1	3	1	1	9	4	2	3	3	5	17	2	2	3	7	5	5	10
3	3	1	1	3	2	5	18	5	5	5	4	4	23	4	4	4	12	3	1	4
2	1	1	2	3	2	1	12	5	5	5	5	5	25	1	2	1	4	1	2	3
1	1	1	1	1	1	3	9	2	4	4	3	4	17	1	1	1	3	1	1	2
3	2	2	1	2	3	1	14	5	5	4	4	4	22	4	3	2	9	2	2	4
1	2	2	1	3	2	2	13	4	4	4	4	3	19	1	2	3	6	2	3	5
2	1	1	1	1	1	1	8	5	1	5	5	3	19	3	2	3	8	3	3	6
2	1	3	3	3	3	3	18	3	3	3	3	3	15	3	3	3	9	3	3	6
3	2	2	1	2	2	2	14	3	5	3	3	2	16	2	2	3	7	2	2	4
1	1	1	2	2	1	2	10	3	5	2	2	4	16	1	2	4	7	1	1	2
3	2	2	1	1	1	1	11	5	5	5	5	5	25	1	1	2	4	1	1	2
1	1	1	1	1	1	1	7	3	5	1	1	1	11	1	1	1	3	1	1	2
1	1	1	2	2	2	1	10	2	2	2	2	2	10	2	2	2	6	2	2	4
2	2	2	1	2	2	2	13	3	5	3	3	5	19	1	2	2	5	2	2	4
2	1	1	1	1	1	1	8	1	1	1	1	1	5	1	1	2	4	2	2	4
1	1	1	1	1	1	1	7	1	2	1	1	2	7	2	2	2	6	2	1	3
2	1	1	2	2	1	1	10	4	4	2	2	1	13	1	1	1	3	1	1	2
1	1	1	1	1	1	1	7	1	5	1	1	5	13	1	1	1	3	1	1	2
1	1	1	1	1	1	1	7	5	4	5	3	5	22	5	5	3	13	3	2	5
1	2	2	2	2	2	2	13	2	1	2	2	2	9	2	2	2	6	2	2	4
1	1	1	1	2	2	1	9	1	1	1	1	2	6	1	1	2	4	1	1	2
1	1	1	2	2	2	3	12	4	5	2	2	3	16	2	2	2	6	2	2	4
2	2	1	1	2	2	1	11	5	5	5	5	5	25	3	3	2	8	2	2	4
1	1	1	1	2	2	1	9	2	1	2	2	2	9	1	1	3	5	1	2	3
1	1	1	1	2	2	1	9	5	5	5	5	5	25	5	5	3	13	1	1	2
1	1	1	1	2	3	2	11	2	3	2	3	3	13	3	2	2	7	2	2	4
1	1	1	1	2	2	1	9	2	3	3	2	3	13	1	1	1	3	1	1	2
1	3	1	5	5	5	1	21	5	5	5	5	5	25	3	5	5	13	5	5	10
1	2	2	1	2	3	2	13	2	5	2	2	2	13	2	2	2	6	1	1	2
1	1	1	1	1	4	3	12	2	2	2	2	3	11	1	1	3	5	3	3	6
1	1	1	1	1	1	1	7	3	5	3	3	2	16	2	2	3	7	1	1	2
3	3	1	1	3	2	3	16	1	4	2	2	3	12	1	1	2	4	3	2	5
1	1	1	1	1	2	1	8	3	4	3	3	3	16	1	2	2	5	1	2	3
1	1	1	1	3	2	2	11	5	2	3	4	5	19	4	4	4	12	1	2	3
3	3	3	3	3	3	3	21	3	3	3	3	3	15	3	3	3	9	3	3	6
1	1	1	1	5	5	2	16	5	5	5	5	5	25	5	5	5	15	3	1	4
2	2	3	5	5	3	2	22	3	5	3	2	3	16	3	3	3	9	3	3	6
2	1	1	1	1	2	1	9	5	5	5	5	5	25	3	3	3	9	3	3	6
2	2	1	1	2	2	1	11	2	2	3	2	3	12	2	2	2	6	2	2	4
2	2	1	1	1	1	1	9	2	2	2	1	1	8	1	1	2	4	1	1	2
2	1	2	2	1	2	2	12	5	5	3	5	5	23	3	2	3	8	2	3	5
2	1	1	1	2	2	3	12	3	4	3	2	4	16	1	1	2	4	1	1	2
2	1	1	1	1	1	1	8	3	5	1	3	3	15	1	1	2	4	2	1	3
3	3	1	2	4	4	1	18	4	4	4	4	3	19	2	2	4	8	2	2	4
3	3	3	3	3	3	3	21	3	3	3	2	2	13	2	2	3	7	2	3	5
1	1	1	1	2	3	1	10	4	5	4	4	4	21	2	2	3	7	2	2	4
4	3	3	4	4	2	4	24	2	3	3	3	3	14	4	3	3	10	3	5	8
1	1	1	1	1	1	1	7	1	1	1	1	1	5	1	1	2	4	2	2	4
2	2	1	1	1	1	1	9	1	1	1	1	1	5	2	2	2	6	2	2	4
1	1	1	1	1	1	1	7	1	1	1	1	1	5	1	1	3	5	2	1	3
1	1	1	1	3	2	3	12	4	4	4	4	4	20	1	1	3	5	2	2	4
1	1	1	1	1	1	1	7	3	3	1	1	1	9	1	2	2	5	1	1	2
1	1	1	1	2	1	1	8	2	5	1	1	2	11	1	1	1	3	1	1	2
3	2	3	1	5	3	3	20	2	3	2	2	2	11	2	3	4	9	3	2	5
1	3	1	2	4	3	4	18	4	3	1	2	5	15	1	2	3	6	2	3	5
1	1	1	1	1	1	1	7	1	2	1	1	2	7	1	1	1	3	1	1	2
2	2	1	1	2	3	1	12	2	4	3	3	3	15	4	4	3	11	4	4	8
2	1	1	2	2	2	2	12	2	2	2	2	3	11	3	3	3	9	2	3	5
1	1	1	1	2	1	2	9	2	2	2	2	1	9	1	1	3	5	2	1	3
1	1	1	1	1	1	2	8	2	3	1	4	2	12	2	3	4	9	2	1	3
2	1	1	1	1	1	1	8	1	1	1	1	1	5	1	1	1	3	1	1	2
2	1	1	1	1	1	1	8	1	1	1	1	3	7	1	2	3	6	1	1	2
1	1	1	2	2	2	2	11	1	2	1	1	1	6	1	2	2	5	1	2	3
1	3	1	3	5	3	1	17	5	5	5	4	4	23	4	5	5	14	4	5	9
1	1	1	2	2	1	1	9	4	5	3	5	5	22	2	2	2	6	1	1	2
1	2	1	2	3	3	3	15	1	2	1	1	1	6	1	1	2	4	3	2	5
1	1	1	2	2	1	2	10	2	4	1	1	1	9	2	2	2	6	2	1	3
1	1	1	1	1	2	1	8	2	1	1	1	2	7	1	2	2	5	1	1	2
2	1	1	1	2	1	1	9	2	5	2	1	1	11	2	3	3	8	1	1	2
1	2	2	2	3	3	3	16	5	5	2	2	1	15	3	3	3	9	1	1	2
3	1	1	3	2	2	3	15	1	1	1	1	2	6	1	2	2	5	2	1	3
2	1	1	2	2	2	2	12	2	2	2	2	2	10	2	2	2	6	2	2	4
1	1	1	1	1	1	2	8	3	3	1	2	2	11	1	1	1	3	1	1	2
2	2	1	1	2	2	2	12	3	5	4	4	5	21	4	4	4	12	2	2	4
1	1	1	2	2	2	1	10	1	1	1	1	1	5	1	2	2	5	1	2	3
1	1	1	1	1	1	1	7	1	3	1	1	1	7	1	1	1	3	1	1	2
1	2	1	1	2	2	2	11	2	5	3	4	3	17	1	2	5	8	2	2	4
2	1	1	1	2	2	2	11	5	5	3	4	5	22	3	3	3	9	2	2	4
1	1	1	2	1	2	1	9	1	2	1	1	2	7	1	1	3	5	1	2	3
3	3	3	3	3	3	3	21	3	3	3	3	3	15	3	3	3	9	3	3	6
3	3	3	3	3	3	3	21	3	3	3	3	3	15	3	3	3	9	3	3	6
1	1	1	1	1	1	3	9	3	4	2	3	2	14	1	1	3	5	1	1	2
2	1	1	2	1	1	3	11	5	5	5	3	5	23	1	1	1	3	1	1	2
1	1	1	2	2	2	1	10	2	3	1	1	3	10	1	1	3	5	1	1	2
3	3	3	1	3	3	3	19	5	5	5	5	5	25	5	5	5	15	5	5	10
1	1	1	1	2	2	2	10	2	3	1	1	2	9	3	3	3	9	3	3	6
2	3	1	2	4	2	2	16	5	5	3	4	5	22	1	2	3	6	2	2	4
2	1	1	3	2	2	3	14	4	1	5	4	4	18	2	3	2	7	1	1	2
2	2	1	4	4	3	2	18	4	2	3	2	4	15	4	4	4	12	4	4	8
1	1	1	1	2	1	1	8	1	1	1	1	2	6	1	2	2	5	1	1	2
2	2	2	1	3	3	3	16	4	1	5	4	4	18	1	1	5	7	1	1	2
1	1	1	1	2	2	2	10	3	1	2	1	1	8	2	2	3	7	1	1	2
2	1	1	1	2	2	2	11	3	4	2	2	3	14	1	1	4	6	3	2	5
2	1	1	1	1	1	2	9	4	4	3	4	4	19	3	3	3	9	1	1	2
1	1	1	1	2	2	1	9	1	3	3	3	3	13	3	3	3	9	3	3	6
1	1	1	1	2	1	1	8	4	5	2	2	5	18	2	2	2	6	1	2	3
1	1	1	2	2	1	3	11	1	3	1	1	3	9	2	2	2	6	1	2	3
2	2	1	2	3	2	2	14	2	1	2	1	2	8	2	2	3	7	3	3	6
2	2	1	2	2	3	3	15	4	5	3	3	4	19	1	1	1	3	2	3	5
3	3	1	2	3	3	3	18	3	3	4	2	5	17	3	3	3	9	1	2	3
3	1	1	2	1	2	1	11	1	2	1	1	3	8	3	3	4	10	2	2	4
1	1	1	1	3	2	1	10	5	2	2	2	1	12	1	1	3	5	2	1	3
1	2	1	1	2	2	3	12	3	3	1	1	3	11	3	3	3	9	1	1	2
1	1	1	1	1	1	1	7	5	5	3	4	5	22	3	3	3	9	2	1	3
1	1	1	1	1	1	1	7	2	5	5	5	3	20	1	1	1	3	1	1	2
3	3	3	3	3	3	3	21	3	3	3	3	3	15	3	3	3	9	3	3	6
2	2	1	1	2	1	2	11	5	1	1	1	1	9	1	1	3	5	1	2	3
2	1	1	3	2	2	1	12	4	5	4	4	4	21	3	3	3	9	1	2	3
2	1	1	3	3	3	1	14	4	5	2	1	4	16	1	1	4	6	4	3	7
2	1	1	1	2	1	3	11	2	3	1	1	2	9	1	1	3	5	1	1	2
1	1	1	1	2	1	2	9	3	4	4	4	4	19	3	3	3	9	1	1	2
5	5	5	5	5	5	5	35	5	5	5	5	5	25	5	5	5	15	5	5	10
3	3	3	5	4	3	5	26	5	5	5	5	5	25	5	5	5	15	5	5	10
2	2	1	1	2	4	4	16	4	4	4	2	4	18	4	4	4	12	4	4	8
1	1	1	1	4	4	1	13	1	5	3	1	3	13	1	1	1	3	1	1	2
1	1	1	1	1	1	1	7	1	1	1	1	1	5	3	2	2	7	3	1	4
3	3	3	3	3	3	3	21	3	3	3	3	3	15	3	3	3	9	3	3	6
1	1	1	1	2	2	2	10	2	1	1	2	1	7	1	1	2	4	1	1	2
2	2	2	2	2	2	3	15	2	2	3	3	2	12	3	2	3	8	2	2	4
1	1	1	3	5	5	1	17	1	5	1	5	5	17	1	1	2	4	1	1	2
1	1	1	1	2	1	1	8	1	3	2	1	3	10	1	1	3	5	1	2	3
3	2	1	2	3	2	2	15	3	5	3	3	3	17	2	2	3	7	2	2	4
1	1	1	1	1	1	2	8	1	1	1	1	5	9	1	1	1	3	1	1	2
3	2	2	4	4	2	3	20	4	5	2	2	4	17	4	4	3	11	3	2	5
1	1	2	2	4	3	3	16	3	3	3	3	3	15	3	3	3	9	3	2	5
2	2	1	2	2	3	2	14	3	1	3	3	4	14	2	2	3	7	2	2	4
3	3	3	3	3	3	3	21	3	3	3	3	3	15	3	3	3	9	3	3	6
1	1	1	2	1	1	1	8	2	1	1	1	1	6	1	1	1	3	1	1	2
2	4	1	3	4	4	1	19	4	5	5	5	5	24	2	2	2	6	3	3	6
1	1	1	1	2	2	2	10	3	5	2	4	4	18	2	2	3	7	1	1	2
1	1	1	1	1	2	3	10	4	1	1	1	3	10	3	3	3	9	1	1	2
2	2	1	2	2	2	2	13	2	2	2	1	2	9	1	1	1	3	1	1	2
3	3	3	3	3	3	3	21	3	3	3	3	3	15	3	3	3	9	3	3	6
2	1	1	2	2	2	2	12	1	5	4	4	4	18	3	3	4	10	3	3	6
2	2	2	2	3	3	3	17	3	3	3	3	3	15	3	3	3	9	2	2	4
1	2	1	3	3	3	4	17	1	4	2	3	3	13	1	3	4	8	1	1	2
2	1	1	1	1	1	1	8	2	2	1	1	1	7	2	2	2	6	1	1	2
3	4	1	1	2	4	1	16	5	5	2	3	3	18	1	2	3	6	3	3	6
3	3	3	3	3	3	3	21	3	3	3	3	3	15	3	3	3	9	3	3	6
2	1	1	1	1	1	1	8	1	5	1	1	3	11	1	1	2	4	1	1	2
1	1	1	4	2	5	2	16	5	5	2	3	5	20	3	5	3	11	3	2	5
2	2	2	3	3	3	3	18	3	3	3	3	3	15	2	2	3	7	3	3	6
1	1	1	1	2	1	1	8	3	1	1	1	3	9	1	1	3	5	1	1	2
1	1	1	1	2	2	2	10	5	1	5	5	5	21	1	1	2	4	1	2	3
1	1	1	1	2	2	1	9	3	1	1	2	2	9	2	2	2	6	1	1	2
1	2	1	1	3	2	1	11	3	2	4	2	1	12	3	3	3	9	1	2	3
1	1	1	1	2	1	3	10	2	1	2	2	2	9	1	1	2	4	1	1	2
1	3	1	1	2	1	1	10	5	5	4	3	1	18	3	3	3	9	1	1	2
3	3	3	3	3	3	3	21	3	3	3	3	3	15	3	3	3	9	3	3	6
3	2	2	2	2	2	3	16	2	2	2	2	2	10	2	2	2	6	2	2	4
2	1	1	1	2	3	3	13	1	1	1	1	2	6	1	1	1	3	1	1	2
3	3	3	3	3	3	3	21	3	3	3	3	3	15	3	3	3	9	3	3	6
2	1	2	1	2	2	1	11	4	4	2	2	3	15	1	2	3	6	2	2	4
1	1	1	2	2	2	2	11	2	3	3	2	2	12	2	2	2	6	2	2	4
1	1	1	1	1	1	1	7	1	1	1	1	1	5	1	1	3	5	2	2	4
1	1	1	1	2	2	3	11	2	4	1	1	2	10	3	1	2	6	1	1	2
1	1	1	1	2	1	1	8	2	2	2	3	4	13	3	3	3	9	2	2	4
1	1	2	1	1	2	2	10	3	2	1	1	5	12	1	1	3	5	1	2	3
1	1	1	1	2	1	3	10	3	5	2	2	3	15	2	2	4	8	1	2	3
2	2	2	1	2	2	2	13	4	5	2	2	3	16	2	2	2	6	2	1	3
2	1	1	2	1	1	2	10	2	2	2	2	2	10	2	2	2	6	2	2	4
1	1	1	1	1	1	1	7	1	2	3	3	3	12	3	3	3	9	3	3	6
1	1	1	1	1	1	1	7	1	1	1	1	1	5	1	2	2	5	2	1	3
2	1	1	2	2	4	1	13	1	4	1	2	2	10	1	2	2	5	1	1	2
1	1	1	1	2	3	1	10	3	5	3	3	5	19	1	1	1	3	2	1	3
1	1	1	1	1	1	2	8	1	1	1	1	1	5	1	1	1	3	1	1	2
1	1	1	1	2	1	2	9	1	2	1	2	1	7	1	1	1	3	1	1	2
2	1	1	1	2	1	2	10	5	1	5	5	5	21	1	1	2	4	1	2	3
2	1	1	1	2	2	1	10	5	4	1	2	5	17	3	3	4	10	5	4	9
1	1	1	1	1	1	1	7	5	3	3	3	4	18	1	1	3	5	3	2	5
1	1	1	2	3	2	2	12	3	5	3	4	3	18	2	1	3	6	1	2	3
2	1	3	3	2	2	2	15	4	4	3	2	3	16	3	4	4	11	3	2	5
2	2	2	2	2	2	2	14	3	4	4	4	4	19	4	4	4	12	4	3	7
1	1	2	1	2	2	1	10	2	5	1	1	2	11	2	2	2	6	1	1	2
1	1	1	1	2	1	1	8	3	3	3	2	3	14	3	3	3	9	1	1	2
1	1	1	1	1	1	1	7	2	2	1	2	3	10	1	1	1	3	1	1	2
1	2	1	2	2	2	2	12	1	1	1	1	1	5	1	1	1	3	1	2	3
2	2	2	2	2	2	2	14	2	2	2	2	2	10	2	2	2	6	2	2	4
1	1	1	1	1	1	1	7	4	1	1	1	5	12	4	4	2	10	1	3	4
1	1	1	1	1	1	1	7	1	1	1	1	1	5	1	1	2	4	2	2	4
2	1	1	2	2	2	2	12	3	5	2	3	5	18	4	4	5	13	3	3	6
2	1	1	1	1	1	1	8	5	5	5	5	5	25	5	5	5	15	1	1	2
2	2	2	1	2	2	2	13	4	5	5	5	5	24	5	5	5	15	1	1	2
1	1	1	1	3	4	2	13	4	5	4	3	2	18	3	3	4	10	4	4	8
1	1	1	1	1	1	1	7	1	1	1	2	2	7	2	2	2	6	2	2	4
1	1	1	1	1	1	5	11	2	5	1	3	1	12	2	2	1	5	1	1	2
2	1	1	2	2	2	1	11	2	1	1	1	2	7	1	2	3	6	1	1	2
1	1	1	2	2	3	3	13	2	3	2	2	3	12	3	3	3	9	3	3	6
2	2	1	2	2	3	2	14	2	2	2	1	2	9	1	1	2	4	1	2	3
3	3	2	2	3	3	3	19	2	2	2	1	1	8	3	3	3	9	3	3	6
1	1	1	1	1	1	5	11	5	5	5	5	5	25	1	1	1	3	1	1	2
1	1	1	1	3	2	1	10	5	5	3	2	5	20	3	3	3	9	2	1	3
2	2	2	1	2	2	2	13	1	2	2	2	2	9	2	2	2	6	2	2	4
3	3	3	3	3	3	4	22	4	4	3	3	3	17	3	2	3	8	3	3	6
3	2	1	1	2	1	2	12	1	2	1	2	4	10	2	2	3	7	2	1	3
3	3	2	3	3	3	3	20	4	3	3	3	3	16	2	3	3	8	2	2	4
2	1	1	1	3	3	3	14	2	4	2	2	2	12	1	2	2	5	1	1	2
2	1	1	2	2	2	3	13	2	2	2	2	2	10	2	3	3	8	2	2	4
3	3	2	2	2	2	4	18	5	5	3	3	3	19	2	2	3	7	2	2	4
2	2	1	1	3	3	3	15	4	4	3	3	4	18	2	2	4	8	3	3	6
1	1	1	1	1	1	1	7	4	5	5	1	3	18	3	3	3	9	3	1	4
1	1	3	2	4	3	3	17	5	5	5	5	5	25	5	5	5	15	3	3	6
2	2	1	3	3	3	2	16	3	2	2	3	4	14	3	3	4	10	3	2	5
3	3	3	3	3	3	3	21	3	3	3	3	3	15	3	3	3	9	3	3	6
1	1	1	1	2	2	3	11	3	1	3	1	3	11	4	3	5	12	1	1	2
1	1	1	1	1	1	1	7	2	3	1	1	3	10	3	1	3	7	1	1	2
1	1	1	1	2	1	2	9	3	5	1	1	1	11	2	3	5	10	1	1	2
3	3	3	2	4	3	4	22	3	3	3	3	3	15	3	3	3	9	3	3	6
1	1	1	1	2	2	2	10	3	4	5	2	3	17	4	4	3	11	1	2	3
2	1	1	1	1	1	1	8	1	1	1	1	1	5	1	1	1	3	1	1	2
1	1	1	1	2	2	2	10	2	2	2	2	4	12	1	1	2	4	2	2	4
2	1	1	1	1	2	1	9	2	5	2	1	1	11	2	2	5	9	5	2	7
2	1	1	2	2	1	4	13	5	5	5	2	4	21	3	3	5	11	3	1	4
1	2	2	2	3	2	2	14	2	4	2	2	4	14	5	5	5	15	4	4	8
1	1	1	1	2	1	1	8	1	1	1	1	1	5	1	1	1	3	1	1	2
1	1	1	1	1	1	1	7	1	2	1	2	2	8	2	2	2	6	1	1	2
1	1	1	1	1	1	3	9	2	2	1	1	1	7	1	1	2	4	1	1	2
3	3	3	3	3	3	3	21	3	3	3	3	3	15	3	3	3	9	3	3	6
1	1	1	3	2	2	2	12	2	3	2	1	1	9	1	1	1	3	2	2	4
4	4	4	3	5	5	3	28	5	5	5	5	5	25	2	2	5	9	3	5	8
1	1	1	1	1	1	1	7	2	3	1	2	3	11	3	3	3	9	2	2	4
3	2	3	3	3	3	3	20	3	3	3	3	3	15	3	3	3	9	3	3	6
2	1	1	1	5	4	1	15	5	5	3	4	5	22	2	1	2	5	1	1	2
3	3	1	2	3	3	2	17	4	1	2	1	4	12	2	3	3	8	2	3	5
1	1	1	1	1	1	1	7	1	1	1	1	1	5	2	2	2	6	1	1	2
2	1	1	1	2	1	1	9	2	5	3	2	2	14	2	2	3	7	3	3	6
1	1	2	2	3	5	5	19	4	4	3	2	3	16	3	3	4	10	2	2	4
3	3	3	3	3	3	3	21	3	3	3	4	4	17	4	4	3	11	3	3	6
1	1	1	2	1	1	1	8	1	1	1	1	1	5	1	1	1	3	1	1	2
3	3	3	3	3	3	3	21	3	3	3	3	3	15	3	3	3	9	3	3	6
1	1	1	1	1	1	1	7	2	3	2	2	2	11	1	1	1	3	1	1	2
2	3	1	2	3	1	1	13	2	1	1	1	2	7	2	2	2	6	2	2	4
1	1	1	1	1	1	1	7	3	2	1	1	1	8	1	1	3	5	1	1	2
2	2	1	3	3	2	3	16	3	2	3	1	2	11	1	2	3	6	2	2	4
1	2	2	2	2	2	2	13	3	4	2	2	2	13	2	2	3	7	2	2	4
3	3	3	3	3	3	3	21	3	3	3	3	3	15	3	3	3	9	3	3	6
2	2	2	2	2	2	2	14	3	4	2	2	2	13	2	2	2	6	2	2	4
1	1	1	1	2	1	3	10	1	1	1	3	2	8	4	4	4	12	1	1	2
1	1	1	1	2	2	2	10	1	5	1	2	2	11	1	1	2	4	1	1	2
1	1	1	2	3	1	1	10	5	3	2	2	3	15	3	2	3	8	2	3	5
2	1	1	1	3	1	2	11	1	5	2	2	3	13	5	5	5	15	3	4	7
3	3	3	3	3	3	3	21	3	3	3	3	3	15	3	3	3	9	3	3	6
1	1	1	1	3	3	2	12	2	1	2	2	3	10	2	2	2	6	2	2	4
4	4	3	1	2	1	2	17	2	2	1	2	5	12	2	2	4	8	3	2	5
2	3	1	2	2	2	2	14	3	5	3	3	2	16	3	4	4	11	3	3	6
5	5	4	3	3	2	2	24	3	2	3	3	2	13	4	3	4	11	3	3	6
1	1	1	2	2	2	2	11	2	2	1	2	2	9	3	2	3	8	2	2	4
2	3	3	2	3	3	3	19	5	4	3	3	4	19	3	3	4	10	3	2	5
2	1	1	2	3	3	2	14	2	3	2	2	2	11	2	2	3	7	2	2	4
3	2	2	2	2	2	3	16	2	2	2	2	2	10	1	1	1	3	2	1	3
2	1	1	1	2	1	2	10	1	1	1	1	2	6	2	2	3	7	1	1	2
5	1	1	3	1	1	1	13	3	3	3	3	1	13	3	1	3	7	3	1	4
1	1	1	1	2	3	3	12	3	3	3	4	5	18	3	3	3	9	3	3	6
1	1	3	3	3	3	1	15	2	1	2	1	4	10	3	3	2	8	2	2	4
1	1	1	1	1	1	5	11	1	5	5	5	2	18	1	1	2	4	1	1	2
1	1	1	1	2	2	1	9	2	3	1	2	3	11	1	2	2	5	1	1	2
2	2	1	1	2	2	1	11	2	1	2	2	3	10	2	2	2	6	2	2	4
1	1	1	2	1	2	1	9	3	1	1	2	3	10	1	1	3	5	2	1	3
2	1	1	2	2	2	1	11	3	5	1	3	3	15	3	3	3	9	1	1	2
3	1	1	3	2	2	2	14	4	5	2	1	5	17	1	1	1	3	3	3	6
1	1	1	1	1	1	1	7	1	1	1	1	1	5	3	3	3	9	1	1	2
3	2	1	2	3	3	2	16	2	2	1	2	3	10	2	3	3	8	2	2	4
1	1	1	1	1	3	3	11	2	3	1	1	1	8	1	1	3	5	2	1	3
2	1	1	3	2	3	3	15	2	5	4	4	4	19	1	4	5	10	2	1	3
1	1	1	1	1	1	1	7	4	5	3	2	4	18	3	3	5	11	1	1	2
3	3	1	2	3	3	3	18	3	3	3	3	3	15	3	3	3	9	3	3	6
2	1	1	1	1	2	1	9	1	5	3	2	3	14	2	2	2	6	1	2	3
2	1	1	2	1	2	3	12	2	5	1	4	4	16	1	1	5	7	2	2	4
3	2	2	1	3	2	2	15	2	2	2	2	2	10	2	2	2	6	2	2	4
2	1	1	1	2	3	1	11	5	1	2	2	5	15	1	1	1	3	1	1	2
1	1	1	1	1	1	1	7	1	1	1	1	1	5	1	3	2	6	1	1	2
1	1	1	1	2	2	1	9	3	2	2	1	4	12	1	1	2	4	2	1	3
1	1	1	1	2	2	2	10	5	5	5	4	4	23	1	2	4	7	3	2	5
2	3	1	2	2	3	2	15	3	4	3	3	3	16	2	2	2	6	1	2	3
1	1	1	1	1	1	1	7	1	1	2	2	2	8	2	2	2	6	2	2	4
1	1	1	3	2	2	2	12	1	5	2	1	1	10	2	2	2	6	2	1	3
2	2	1	2	2	3	2	14	2	1	1	3	2	9	3	3	3	9	1	1	2
1	1	1	1	2	2	3	11	2	4	3	2	4	15	2	2	3	7	2	2	4
2	1	1	1	2	2	1	10	1	2	2	2	2	9	2	2	2	6	2	2	4
2	2	1	1	2	1	1	10	3	2	2	3	5	15	1	2	2	5	1	1	2
1	2	2	1	3	2	2	13	2	5	5	3	5	20	2	2	3	7	1	2	3
1	1	1	1	2	2	2	10	1	1	1	1	1	5	1	1	1	3	1	1	2
1	1	2	2	5	4	4	19	2	4	4	5	3	18	1	1	4	6	1	2	3
4	4	2	4	4	4	4	26	3	4	3	3	3	16	2	2	3	7	3	2	5
3	4	1	1	5	5	4	23	3	5	3	3	5	19	2	2	4	8	3	3	6
4	4	4	4	4	4	4	28	4	4	4	4	4	20	4	4	4	12	4	4	8
1	1	1	1	2	2	3	11	2	1	2	2	2	9	2	2	2	6	2	2	4
3	1	1	2	1	1	1	10	2	2	1	1	1	7	3	1	1	5	2	1	3
1	2	1	1	1	1	1	8	1	2	2	1	1	7	1	2	1	4	1	1	2
1	2	1	2	2	2	2	12	3	2	2	2	3	12	3	2	2	7	2	2	4
2	2	1	1	1	1	2	10	1	1	1	1	3	7	3	3	2	8	1	1	2
1	1	1	1	1	1	1	7	5	1	5	1	5	17	1	1	1	3	1	1	2
2	2	1	1	5	3	3	17	4	5	3	3	4	19	4	5	5	14	3	3	6
2	2	1	2	2	2	2	13	3	5	3	5	5	21	3	4	4	11	3	2	5
3	3	3	3	3	3	3	21	3	3	3	3	3	15	3	3	3	9	3	3	6
1	1	1	4	4	4	1	16	1	1	2	1	2	7	1	1	1	3	1	1	2
2	1	1	2	2	1	3	12	4	5	4	1	5	19	2	2	5	9	2	1	3
3	3	3	3	3	3	3	21	3	3	3	3	3	15	3	3	3	9	3	3	6
1	1	1	1	1	1	1	7	1	3	1	1	1	7	1	1	1	3	1	1	2
1	1	1	2	2	2	2	11	1	2	1	1	2	7	1	3	3	7	1	1	2
1	1	1	1	1	2	2	9	1	1	1	1	2	6	1	1	1	3	2	1	3
1	1	1	1	1	1	1	7	5	5	3	2	4	19	2	2	2	6	3	1	4
1	1	1	1	1	1	1	7	5	1	1	1	3	11	1	3	4	8	1	1	2
2	1	2	1	2	1	2	11	1	2	2	2	1	8	1	1	1	3	1	1	2
1	1	1	1	2	2	1	9	5	5	1	3	5	19	1	1	2	4	2	2	4
1	1	1	2	2	2	2	11	1	2	1	1	1	6	2	2	1	5	2	2	4
1	1	1	1	2	2	1	9	1	1	1	1	1	5	2	1	2	5	1	2	3
1	1	1	2	2	1	1	9	3	2	2	2	3	12	2	2	1	5	1	1	2
1	1	1	1	1	1	1	7	3	4	3	3	4	17	1	1	1	3	1	1	2
1	1	1	1	1	1	1	7	5	1	4	4	4	18	5	3	5	13	1	1	2
1	1	1	2	1	2	1	9	2	1	1	2	5	11	3	3	3	9	1	1	2
1	1	1	1	1	1	1	7	3	4	3	3	2	15	2	2	2	6	1	1	2
2	2	1	1	2	1	2	11	3	1	1	1	2	8	2	2	3	7	2	3	5
1	1	1	1	1	1	1	7	4	3	2	2	2	13	1	1	1	3	1	1	2
1	2	1	4	3	3	1	15	5	5	5	3	3	21	1	1	1	3	1	1	2
2	2	1	2	2	1	3	13	5	1	1	1	1	9	1	1	3	5	1	1	2
1	1	1	1	2	2	2	10	4	5	1	1	2	13	3	2	2	7	2	2	4
2	1	1	1	1	1	1	8	1	5	1	1	2	10	1	1	2	4	1	1	2
1	1	1	1	1	1	1	7	1	1	1	1	2	6	1	2	2	5	1	1	2
1	1	1	1	1	1	1	7	4	5	1	2	1	13	1	1	2	4	1	1	2
2	1	1	1	1	1	1	8	2	5	4	3	3	17	1	1	3	5	2	2	4
2	1	1	1	2	1	1	9	1	5	2	2	3	13	2	1	2	5	2	3	5
1	1	1	1	1	2	1	8	2	1	2	3	4	12	3	2	4	9	2	2	4
2	2	1	1	4	5	1	16	5	5	5	4	3	22	1	1	1	3	4	4	8
2	1	1	1	1	1	4	11	2	4	4	4	4	18	4	4	4	12	1	1	2
3	3	3	3	3	3	3	21	3	3	3	3	3	15	3	3	3	9	3	3	6
2	2	1	2	2	2	2	13	2	4	4	3	4	17	2	2	2	6	2	2	4
1	2	1	1	2	2	2	11	3	2	2	2	2	11	3	2	3	8	3	2	5
3	3	2	2	3	3	2	18	4	4	4	3	3	18	3	4	3	10	3	2	5
1	1	1	1	2	2	2	10	1	5	5	5	5	21	3	3	3	9	3	3	6
4	3	1	1	2	2	2	15	3	3	3	3	3	15	3	3	3	9	3	3	6
3	2	3	1	4	3	3	19	4	4	2	3	3	16	1	1	4	6	2	1	3
1	1	1	1	1	1	1	7	2	2	2	2	1	9	1	1	1	3	1	1	2
2	2	2	2	2	2	2	14	2	2	3	3	2	12	2	2	2	6	2	2	4
1	2	1	2	2	2	2	12	2	1	1	2	2	8	2	1	2	5	1	2	3
3	3	2	1	1	2	2	14	2	2	3	2	2	11	3	3	3	9	3	3	6
3	3	2	3	2	4	3	20	2	5	2	2	5	16	1	2	4	7	2	1	3
1	1	1	1	1	1	1	7	3	4	2	1	2	12	1	1	2	4	2	1	3
3	3	3	3	3	3	3	21	3	3	3	3	3	15	3	3	3	9	3	3	6
1	1	1	2	2	2	3	12	3	2	2	2	2	11	2	2	2	6	2	2	4
2	3	2	2	3	3	3	18	3	2	3	5	3	16	1	2	2	5	3	3	6
2	1	1	1	2	2	1	10	4	5	3	3	4	19	2	3	3	8	2	2	4
1	1	1	1	1	1	1	7	1	5	3	1	3	13	1	1	3	5	1	1	2
3	3	3	3	3	3	3	21	3	3	3	3	3	15	3	3	3	9	3	3	6
2	1	1	3	3	3	3	16	1	5	2	1	2	11	1	1	1	3	4	2	6
1	1	1	1	1	2	1	8	3	4	2	2	3	14	2	2	2	6	2	1	3
2	3	1	2	3	3	3	17	4	4	4	5	3	20	2	2	2	6	2	1	3
1	1	1	2	1	1	1	8	3	1	1	1	1	7	1	1	1	3	1	1	2
3	3	3	3	3	3	3	21	3	3	3	3	3	15	3	3	3	9	3	3	6
1	1	1	1	2	2	1	9	1	1	1	1	3	7	1	1	2	4	1	1	2
2	1	1	1	2	2	2	11	2	4	1	2	3	12	2	2	2	6	2	2	4
2	2	1	2	2	1	2	12	2	1	1	1	1	6	1	2	2	5	2	2	4
1	1	1	1	1	1	1	7	2	1	3	1	2	9	1	1	1	3	1	1	2
3	3	3	3	3	3	3	21	3	3	3	3	3	15	3	3	4	10	3	2	5
1	1	1	1	2	1	1	8	1	1	1	1	1	5	1	1	2	4	1	1	2
1	1	1	1	1	3	1	9	1	1	1	1	1	5	2	1	1	4	1	1	2
3	3	3	3	3	3	3	21	3	3	3	3	3	15	3	3	3	9	3	3	6
2	1	1	2	1	2	4	13	2	2	1	1	2	8	1	1	2	4	1	1	2
2	2	2	1	2	2	2	13	3	4	4	3	4	18	2	1	2	5	1	1	2
3	3	1	3	3	2	2	17	3	5	3	3	4	18	3	3	3	9	2	2	4
1	1	1	1	2	3	2	11	4	4	3	2	3	16	1	1	2	4	1	1	2
3	2	2	1	3	3	3	17	3	5	3	3	5	19	3	3	5	11	3	1	4
2	2	2	2	2	2	2	14	2	2	2	2	2	10	2	2	2	6	2	2	4
1	1	1	1	1	1	1	7	3	5	1	1	3	13	1	2	2	5	1	2	3
2	2	3	1	2	2	2	14	4	4	1	2	2	13	2	2	2	6	1	2	3
3	3	3	3	3	3	3	21	3	3	3	3	3	15	3	3	3	9	3	3	6
2	2	1	1	2	2	1	11	1	1	1	2	2	7	1	1	1	3	2	2	4
2	1	1	2	2	1	2	11	2	5	2	1	3	13	1	2	3	6	1	1	2
1	1	1	1	2	1	2	9	2	1	1	2	2	8	2	2	3	7	1	3	4
2	1	2	1	3	2	3	14	5	3	2	3	5	18	2	2	3	7	2	2	4
1	1	1	1	1	3	2	10	5	5	5	2	3	20	1	1	5	7	2	2	4
3	3	3	3	3	3	3	21	3	3	3	3	3	15	3	3	3	9	3	3	6
1	1	1	1	1	1	1	7	2	1	2	1	1	7	1	2	2	5	2	1	3
2	2	1	3	3	3	2	16	2	2	2	2	3	11	2	2	2	6	2	2	4
1	1	1	1	1	1	5	11	2	2	1	1	1	7	3	3	3	9	1	1	2
2	1	1	1	4	2	1	12	1	1	1	1	4	8	1	1	1	3	1	1	2
1	1	1	2	2	2	1	10	2	2	1	1	2	8	1	2	2	5	1	1	2
1	1	1	3	2	2	2	12	3	5	1	1	4	14	3	3	4	10	3	3	6
2	1	2	1	2	1	2	11	2	2	2	2	2	10	2	2	2	6	2	2	4
1	2	1	1	2	1	1	9	3	2	2	1	3	11	3	3	3	9	2	1	3
3	3	3	3	3	3	3	21	3	3	3	3	3	15	3	3	3	9	3	3	6
2	2	2	1	2	2	2	13	2	2	2	2	2	10	2	2	2	6	2	2	4
2	1	1	1	2	2	1	10	1	1	1	3	1	7	1	3	4	8	3	2	5
3	3	3	3	3	3	3	21	3	3	3	3	3	15	3	3	3	9	3	3	6
1	2	1	5	3	4	1	17	4	3	2	2	3	14	2	2	1	5	1	2	3
2	1	1	2	1	1	1	9	2	1	1	2	1	7	1	2	1	4	1	1	2
2	1	1	1	3	1	3	12	2	1	5	4	4	16	2	3	3	8	3	2	5
2	2	1	1	1	1	2	10	2	1	1	1	2	7	1	1	1	3	2	2	4
2	1	1	2	2	2	2	12	3	1	5	5	5	19	2	2	2	6	2	2	4
2	2	1	3	4	3	3	18	4	5	5	4	5	23	1	1	3	5	3	3	6
2	1	1	1	1	2	3	11	3	5	3	2	3	16	2	1	3	6	3	2	5
1	2	2	1	4	3	3	16	3	3	2	3	3	14	2	2	3	7	3	3	6
1	1	1	2	3	3	3	14	1	1	1	1	2	6	3	3	4	10	4	3	7
3	3	2	2	3	2	2	17	5	5	4	4	4	22	4	4	4	12	2	2	4
1	1	1	1	2	1	3	10	3	2	2	3	3	13	2	2	2	6	2	2	4
3	3	3	1	3	3	3	19	3	3	3	3	3	15	3	3	3	9	3	3	6
3	3	1	4	5	2	1	19	5	5	3	3	3	19	3	3	4	10	2	2	4
3	3	3	3	3	3	3	21	3	3	3	3	3	15	3	3	3	9	2	3	5
2	1	1	2	4	2	1	13	5	5	3	4	5	22	2	5	5	12	1	3	4
2	2	1	1	2	2	2	12	5	5	5	5	5	25	3	2	3	8	1	3	4
1	3	4	4	4	4	2	22	4	5	2	4	2	17	2	1	4	7	3	4	7
1	1	1	1	2	2	2	10	2	5	3	1	3	14	1	1	1	3	2	1	3
3	2	1	2	2	2	1	13	4	3	4	4	4	19	2	2	2	6	2	2	4
1	2	1	1	2	1	1	9	1	4	1	1	4	11	1	1	1	3	3	4	7
1	1	1	1	2	2	2	10	4	4	2	2	3	15	3	3	4	10	2	1	3
3	2	1	1	4	4	2	17	3	5	5	5	5	23	2	2	3	7	3	4	7
3	3	3	3	3	3	3	21	3	3	3	3	3	15	3	3	3	9	3	3	6
1	1	1	2	3	3	1	12	3	5	3	2	5	18	3	3	3	9	1	1	2
3	1	1	5	1	1	1	13	5	5	5	5	5	25	1	1	2	4	1	1	2
1	2	1	1	2	2	2	11	2	2	2	2	2	10	1	2	2	5	2	2	4
1	1	1	1	2	1	4	11	1	5	1	2	5	14	3	2	2	7	1	1	2
1	1	1	1	2	2	4	12	4	3	1	2	3	13	1	1	2	4	1	1	2
2	1	1	3	3	3	2	15	3	3	2	3	2	13	2	2	3	7	1	1	2
2	1	1	3	2	2	1	12	1	1	2	2	2	8	2	2	2	6	1	1	2
1	2	1	1	2	2	3	12	2	3	2	2	3	12	1	1	2	4	3	1	4
3	1	1	3	3	2	3	16	2	2	2	2	3	11	4	5	3	12	3	2	5
1	1	1	1	2	2	2	10	3	3	3	3	4	16	3	3	3	9	3	2	5
2	1	1	1	2	3	3	13	4	3	2	2	2	13	1	1	1	3	2	2	4
2	1	1	2	2	2	2	12	2	1	1	1	1	6	1	1	2	4	1	1	2
1	1	1	1	2	1	1	8	2	5	1	1	3	12	1	2	3	6	1	1	2
2	2	1	2	2	2	2	13	2	2	2	2	3	11	2	2	2	6	2	2	4
2	2	2	2	3	3	3	17	3	3	3	2	3	14	3	3	3	9	3	4	7
1	1	1	1	1	1	5	11	5	5	2	4	5	21	2	2	2	6	1	1	2
1	1	1	5	2	1	3	14	1	1	1	2	1	6	1	1	3	5	1	1	2
1	1	1	1	1	1	1	7	1	1	1	1	1	5	1	1	5	7	2	1	3
2	2	2	1	2	1	1	11	2	1	1	1	1	6	1	1	1	3	1	1	2
1	2	2	2	1	1	1	10	1	3	2	2	2	10	2	2	2	6	2	2	4
2	2	2	1	1	2	2	12	2	4	3	2	2	13	2	2	3	7	3	2	5
2	2	2	1	2	3	4	16	3	3	5	5	3	19	5	5	5	15	5	5	10
1	3	1	1	3	3	3	15	3	1	3	3	3	13	3	3	3	9	1	1	2
1	1	2	1	2	2	2	11	1	2	1	2	2	8	2	2	3	7	2	2	4
2	2	1	3	3	3	3	17	2	2	2	2	2	10	1	2	3	6	2	3	5
1	1	1	5	5	1	1	15	5	5	5	5	5	25	5	5	5	15	3	5	8
1	1	1	1	2	2	2	10	1	1	1	2	2	7	1	1	2	4	1	2	3
3	2	2	3	3	3	3	19	3	3	3	3	3	15	3	3	3	9	3	3	6
1	1	1	3	5	3	1	15	3	5	1	1	1	11	1	1	3	5	3	1	4
1	1	1	2	2	2	3	12	2	2	1	1	2	8	1	1	2	4	1	1	2
1	1	1	2	3	1	1	10	4	5	4	4	4	21	2	2	3	7	3	3	6
1	2	1	2	4	2	4	16	2	3	1	1	3	10	1	1	2	4	2	2	4
2	2	1	1	3	1	1	11	1	2	1	1	3	8	1	1	1	3	1	1	2
3	3	5	4	3	3	3	24	3	5	5	4	5	22	5	5	5	15	4	4	8
3	2	2	2	3	3	2	17	2	2	2	2	2	10	2	2	2	6	2	2	4
3	2	1	2	2	3	3	16	2	3	2	2	2	11	3	3	3	9	2	3	5
1	1	1	1	1	2	2	9	2	1	2	2	2	9	2	2	3	7	2	3	5
2	2	2	2	3	2	2	15	3	5	2	2	2	14	2	2	2	6	3	3	6
1	2	1	3	3	3	2	15	1	1	1	1	1	5	1	1	1	3	1	2	3
3	5	2	2	5	5	1	23	2	5	4	4	2	17	3	5	5	13	5	5	10
2	2	1	1	2	2	2	12	2	1	2	1	2	8	2	2	5	9	5	5	10
4	4	3	3	3	3	3	23	3	3	3	3	3	15	3	3	3	9	3	3	6
2	2	2	1	3	3	1	14	5	5	3	4	4	21	1	1	3	5	3	3	6
2	1	1	1	2	3	2	12	5	5	5	5	5	25	4	4	4	12	2	3	5
2	2	1	2	2	2	1	12	1	5	2	2	2	12	1	3	1	5	2	2	4
1	1	1	1	2	1	1	8	5	5	4	2	3	19	2	2	1	5	1	1	2
2	2	1	1	3	3	2	14	3	3	1	1	3	11	2	2	4	8	3	3	6
2	2	2	1	3	2	1	13	3	5	2	3	3	16	1	1	4	6	2	2	4
3	3	3	2	4	3	3	21	5	5	2	3	5	20	2	3	4	9	3	3	6
2	2	2	2	3	3	3	17	3	3	3	3	3	15	3	4	3	10	3	3	6
1	1	1	1	1	1	5	11	3	3	1	3	3	13	1	1	3	5	3	1	4
1	1	1	1	3	2	3	12	1	1	2	3	1	8	1	1	3	5	1	1	2
2	1	1	1	3	2	2	12	4	4	3	2	2	15	3	3	3	9	3	3	6
3	3	3	3	3	3	3	21	3	3	3	3	3	15	3	3	3	9	3	3	6
1	1	1	1	3	3	1	11	1	5	5	1	1	13	3	3	3	9	3	1	4
1	1	1	1	1	1	2	8	1	2	1	1	1	6	1	2	2	5	1	1	2
2	3	1	3	3	2	2	16	1	2	4	2	4	13	1	1	2	4	2	2	4
3	3	3	3	3	3	3	21	3	3	3	3	3	15	3	3	3	9	3	3	6
1	1	2	2	2	2	2	12	3	4	2	2	2	13	2	2	3	7	3	2	5
1	1	1	1	2	1	1	8	1	1	1	2	2	7	1	1	3	5	1	1	2
1	1	1	1	3	3	1	11	2	2	1	1	4	10	3	2	4	9	1	1	2
2	1	1	1	2	1	2	10	2	1	2	2	2	9	1	1	2	4	1	1	2
3	5	1	1	5	5	5	25	5	5	5	5	5	25	5	5	5	15	4	5	9
2	1	1	1	2	2	4	13	2	1	1	3	4	11	1	3	3	7	2	2	4
1	1	1	1	1	1	1	7	3	5	2	1	1	12	1	1	1	3	1	1	2
3	2	3	2	4	3	3	20	4	5	3	3	4	19	4	4	3	11	3	3	6
2	2	2	3	2	2	2	15	3	4	3	2	3	15	3	3	3	9	3	3	6
3	3	3	3	3	3	3	21	3	3	3	3	3	15	3	3	3	9	3	3	6
3	3	3	3	3	3	3	21	3	3	3	3	3	15	3	3	3	9	3	3	6
2	1	1	2	3	2	1	12	3	3	2	1	2	11	3	3	2	8	3	2	5
2	2	1	1	2	2	2	12	1	1	2	2	2	8	2	3	3	8	2	2	4
1	1	1	1	1	1	1	7	1	1	1	1	1	5	2	2	2	6	2	2	4
1	1	1	1	2	3	1	10	2	3	1	1	3	10	1	1	1	3	1	1	2
2	2	3	2	4	3	4	20	3	2	2	1	3	11	1	3	3	7	2	2	4
1	1	1	2	2	2	1	10	2	2	1	1	1	7	1	1	1	3	1	2	3
3	3	3	3	3	3	3	21	3	3	3	3	3	15	3	3	3	9	3	3	6
1	1	1	3	3	1	3	13	2	2	1	3	3	11	1	4	2	7	3	2	5
1	1	1	2	1	1	1	8	1	1	1	1	1	5	1	1	2	4	1	1	2
1	2	2	4	2	2	2	15	1	2	2	2	2	9	1	2	2	5	4	2	6
1	2	1	5	5	3	2	19	2	1	2	3	2	10	2	2	3	7	2	2	4
1	1	1	1	2	1	1	8	1	3	1	2	3	10	3	3	3	9	1	1	2
1	1	1	2	2	1	1	9	2	3	1	2	5	13	1	1	2	4	1	1	2
2	2	1	1	2	2	2	12	2	2	2	2	2	10	3	2	2	7	1	1	2
1	2	1	2	4	3	3	16	2	3	3	3	3	14	2	2	3	7	2	2	4
3	1	1	1	1	1	2	10	2	3	2	2	3	12	3	2	3	8	3	2	5
4	4	4	4	4	4	4	28	4	4	4	4	4	20	4	4	4	12	4	4	8
2	2	2	3	3	2	3	17	2	3	2	2	2	11	2	2	3	7	2	2	4
1	1	1	1	2	2	3	11	2	5	1	3	2	13	3	3	5	11	3	1	4
3	1	1	1	5	5	2	18	2	5	5	5	1	18	2	1	5	8	1	1	2
1	1	1	1	1	1	1	7	1	1	1	1	1	5	1	2	2	5	1	1	2
1	1	1	1	2	1	1	8	2	3	2	1	1	9	1	1	2	4	1	1	2
3	3	3	4	2	2	2	19	3	3	2	3	3	14	3	3	2	8	3	3	6
3	5	5	5	4	3	4	29	5	5	5	4	4	23	5	5	5	15	5	4	9
3	1	1	1	1	1	3	11	5	5	5	3	5	23	3	3	1	7	1	3	4
2	1	1	1	1	1	3	10	3	1	1	2	2	9	1	1	1	3	2	2	4
2	2	2	1	2	2	2	13	2	2	2	2	2	10	2	2	2	6	2	2	4
2	2	1	1	2	2	2	12	1	1	1	1	1	5	1	2	2	5	2	2	4
5	5	5	3	5	5	1	29	5	5	5	5	5	25	3	2	2	7	5	5	10
2	2	2	2	2	2	2	14	3	2	3	3	3	14	3	3	3	9	3	3	6
4	4	4	2	4	4	4	26	4	4	4	4	4	20	1	1	4	6	4	4	8
2	1	1	1	2	1	2	10	2	1	1	1	2	7	1	1	1	3	1	1	2
3	1	1	1	3	3	2	14	1	1	2	2	4	10	1	1	3	5	2	2	4
5	5	4	5	5	5	3	32	5	5	5	5	5	25	5	5	5	15	4	5	9
2	2	2	2	4	4	4	20	4	4	4	4	4	20	4	4	4	12	4	4	8
2	2	2	1	3	3	3	16	1	1	1	1	1	5	1	1	1	3	1	1	2
3	3	3	3	3	3	3	21	3	3	3	3	3	15	3	3	3	9	3	3	6
3	3	1	2	2	3	3	17	5	5	3	3	5	21	3	3	3	9	3	3	6
1	1	1	1	1	1	2	8	1	2	1	1	2	7	2	2	2	6	1	2	3
2	2	1	1	3	3	3	15	3	3	1	1	3	11	3	3	3	9	3	2	5
1	2	1	2	2	1	1	10	2	2	1	1	1	7	3	3	3	9	1	2	3
2	2	2	2	2	2	2	14	2	2	2	2	2	10	2	2	2	6	2	2	4
1	1	1	1	2	2	3	11	4	5	4	4	4	21	4	4	4	12	4	4	8
1	1	1	1	2	1	1	8	3	4	3	2	4	16	2	3	2	7	1	1	2
2	2	1	2	1	1	2	11	2	4	2	1	3	12	2	2	2	6	1	1	2
2	1	1	1	2	2	2	11	2	2	1	1	4	10	1	1	1	3	1	2	3
2	2	1	1	2	1	1	10	2	3	1	1	3	10	1	1	1	3	1	1	2
1	1	1	2	4	3	1	13	2	5	2	3	3	15	3	3	4	10	3	3	6
1	1	1	2	2	1	1	9	2	1	1	1	2	7	2	2	2	6	1	1	2
2	2	1	1	2	2	2	12	3	3	2	2	3	13	2	2	3	7	3	3	6
4	4	4	4	4	4	4	28	4	4	3	4	2	17	2	2	2	6	1	3	4
1	1	1	1	1	1	2	8	2	5	1	3	3	14	1	1	1	3	1	1	2
1	1	1	1	2	2	2	10	2	1	1	2	2	8	2	2	3	7	1	2	3
1	1	1	1	3	3	3	13	3	5	5	3	2	18	3	3	3	9	3	2	5
2	1	1	1	2	2	3	12	2	4	2	2	2	12	3	3	4	10	2	2	4
1	1	1	1	1	1	3	9	2	1	1	1	2	7	1	1	3	5	1	1	2
3	2	2	1	1	3	3	15	3	3	3	3	3	15	3	3	3	9	3	2	5
1	1	1	1	2	1	1	8	2	5	1	1	1	10	1	1	1	3	1	1	2
1	1	1	1	2	2	3	11	2	2	2	1	2	9	2	2	2	6	2	2	4
1	2	1	3	3	2	1	13	4	3	3	3	3	16	2	2	2	6	3	4	7
2	1	1	1	1	2	2	10	3	5	3	3	5	19	3	3	3	9	1	1	2
1	1	1	1	1	1	5	11	1	1	1	1	1	5	3	3	3	9	1	3	4
1	1	1	1	2	2	3	11	2	2	2	1	2	9	2	2	2	6	1	2	3
1	2	1	2	1	2	2	11	2	5	1	2	2	12	1	1	1	3	1	1	2
4	4	1	5	5	5	3	27	5	5	5	5	5	25	1	1	2	4	1	1	2
2	2	1	1	3	4	4	17	4	5	4	4	5	22	1	1	5	7	1	2	3
1	1	1	1	1	1	1	7	5	1	4	3	5	18	5	5	5	15	5	1	6
3	3	3	4	2	3	3	21	3	3	3	3	3	15	2	3	2	7	3	3	6
1	1	1	1	1	1	3	9	4	1	3	4	4	16	5	5	4	14	3	5	8
2	1	1	1	2	2	1	10	3	4	3	3	3	16	2	2	3	7	1	1	2
1	1	1	1	1	1	1	7	3	5	2	2	2	14	2	3	3	8	1	1	2
1	1	1	1	1	1	1	7	1	1	1	1	3	7	2	2	2	6	1	1	2
4	5	4	2	3	4	3	25	5	5	5	5	5	25	3	3	1	7	1	4	5
1	1	1	1	2	1	1	8	2	1	1	2	4	10	4	5	4	13	1	1	2
2	2	2	1	1	1	2	11	3	4	3	3	3	16	2	2	4	8	3	3	6
2	1	1	1	2	3	2	12	2	4	2	3	3	14	3	3	3	9	2	2	4
2	1	1	1	2	2	2	11	2	2	1	3	3	11	3	3	3	9	2	2	4
5	5	5	5	5	5	5	35	5	4	5	5	5	24	5	5	5	15	5	5	10
2	2	2	1	2	2	2	13	4	4	2	2	3	15	1	1	2	4	1	1	2
1	1	1	1	2	1	1	8	1	1	1	1	1	5	2	2	1	5	1	1	2
2	1	1	2	2	2	1	11	2	1	2	2	2	9	1	1	2	4	1	1	2
2	2	2	1	2	1	2	12	3	3	3	2	2	13	3	3	3	9	3	3	6
3	3	3	5	5	4	4	27	4	4	4	5	5	22	5	5	5	15	5	5	10
2	1	1	2	3	2	2	13	4	2	3	2	4	15	3	3	4	10	1	1	2
1	1	1	5	2	2	1	13	5	1	2	4	3	15	3	3	2	8	1	1	2
2	1	1	2	2	2	2	12	2	2	1	1	2	8	1	2	2	5	2	2	4
2	2	2	2	2	2	2	14	2	2	2	2	2	10	2	2	2	6	2	2	4
1	2	1	1	1	3	1	10	3	2	3	1	4	13	1	1	1	3	2	1	3
2	2	1	1	5	5	2	18	2	4	3	3	4	16	1	2	1	4	2	2	4
2	2	1	2	4	3	3	17	3	4	4	4	4	19	1	3	3	7	2	2	4
1	1	1	1	1	1	1	7	4	2	1	1	1	9	1	1	2	4	1	5	6
1	1	1	1	1	1	1	7	2	1	1	2	2	8	2	2	2	6	1	1	2
2	2	1	1	2	1	1	10	3	5	1	1	3	13	1	1	2	4	1	1	2
3	2	1	1	1	1	2	11	5	5	4	4	4	22	3	3	3	9	2	2	4
1	1	1	1	3	3	3	13	2	5	2	2	4	15	4	4	4	12	2	3	5
1	1	1	1	2	2	2	10	2	1	2	1	5	11	1	5	5	11	1	1	2
3	2	2	2	2	2	2	15	2	2	2	2	2	10	2	2	2	6	2	2	4
1	1	1	1	1	1	1	7	1	1	1	1	1	5	1	2	2	5	2	2	4
1	1	1	1	1	1	2	8	2	3	2	1	2	10	2	2	2	6	1	2	3
2	1	1	1	1	1	1	8	2	4	1	3	4	14	1	1	3	5	2	2	4
1	1	1	1	1	1	1	7	3	3	1	1	1	9	1	1	1	3	1	1	2
1	2	1	1	1	1	1	8	1	1	2	2	2	8	2	2	2	6	2	2	4
2	1	1	1	1	2	1	9	2	5	5	5	5	22	2	2	4	8	2	2	4
1	1	1	2	1	1	1	8	1	4	2	1	3	11	2	1	1	4	1	2	3
1	1	1	1	4	3	3	14	5	5	5	5	5	25	3	3	3	9	3	3	6
3	3	3	3	3	3	3	21	3	3	3	3	3	15	3	3	3	9	3	3	6
2	2	2	2	1	2	2	13	1	1	2	2	2	8	2	2	2	6	2	3	5
1	1	1	1	3	2	3	12	4	3	3	3	2	15	1	1	3	5	3	3	6
2	1	2	1	2	2	2	12	2	1	2	2	3	10	2	2	2	6	2	2	4
1	1	1	2	2	2	1	10	2	2	2	1	2	9	1	1	2	4	2	2	4
3	3	3	3	3	3	3	21	3	3	3	3	3	15	3	3	3	9	4	4	8
1	1	1	1	5	1	4	14	5	5	3	3	2	18	2	1	3	6	1	1	2
2	1	1	3	5	3	1	16	2	5	1	1	1	10	3	3	3	9	2	2	4
2	2	1	2	2	3	3	15	3	4	4	3	3	17	2	2	3	7	3	3	6
1	1	1	1	2	2	2	10	1	2	1	1	5	10	2	3	2	7	2	2	4
2	3	3	4	4	4	4	24	4	4	4	4	4	20	1	1	5	7	2	3	5
3	2	2	1	3	2	2	15	2	2	2	2	2	10	2	2	2	6	2	2	4
2	2	1	2	2	2	4	15	3	4	1	1	2	11	2	3	2	7	2	4	6
2	2	2	5	5	5	5	26	5	5	5	5	5	25	5	5	5	15	5	5	10
1	1	1	3	4	5	2	17	5	5	4	5	5	24	1	1	5	7	3	5	8
1	1	1	1	1	1	1	7	5	5	5	5	5	25	4	3	3	10	1	1	2
3	2	1	1	1	2	2	12	5	5	5	5	3	23	2	2	2	6	1	2	3
1	1	1	1	3	3	3	13	3	5	3	3	3	17	3	3	3	9	3	3	6
2	2	1	1	2	2	3	13	4	2	3	2	4	15	2	3	3	8	2	2	4
2	2	1	2	2	3	2	14	3	4	3	4	4	18	4	4	4	12	4	3	7
2	2	2	1	3	3	2	15	2	2	3	4	3	14	2	2	3	7	3	2	5
1	1	1	1	1	1	1	7	1	1	2	2	4	10	4	4	4	12	2	2	4
3	3	2	2	2	3	2	17	5	5	3	2	5	20	2	2	3	7	1	1	2
3	3	3	3	3	3	3	21	3	3	3	3	3	15	3	3	3	9	3	3	6
3	3	1	3	4	4	1	19	2	5	2	4	5	18	1	2	5	8	5	4	9
4	4	4	4	4	4	4	28	4	4	3	4	3	18	4	4	4	12	4	3	7
1	2	1	1	3	4	2	14	4	4	4	4	4	20	2	2	3	7	3	3	6
2	3	2	4	3	3	2	19	4	5	4	3	3	19	3	3	2	8	3	3	6
1	4	2	4	4	4	3	22	3	3	2	2	2	12	3	3	3	9	3	3	6
1	1	1	1	1	1	3	9	1	3	1	1	1	7	4	4	4	12	3	1	4
1	4	1	1	1	1	4	13	1	1	1	1	1	5	4	4	1	9	4	1	5
2	2	1	2	2	2	2	13	3	4	4	4	4	19	3	3	3	9	3	3	6
3	3	3	3	3	3	3	21	3	3	3	3	3	15	3	3	3	9	3	3	6
1	2	1	5	4	4	5	22	5	5	4	5	4	23	3	5	5	13	5	3	8
3	3	3	3	3	3	3	21	3	3	3	3	3	15	3	3	3	9	3	3	6
3	3	3	3	3	3	3	21	3	3	3	3	3	15	3	3	3	9	3	3	6
1	1	1	1	1	1	1	7	2	3	1	5	2	13	3	3	3	9	2	3	5
2	2	1	1	2	3	2	13	2	1	1	2	2	8	1	2	3	6	1	1	2
1	1	1	1	2	1	1	8	2	2	1	1	1	7	1	1	1	3	1	1	2
4	4	3	4	4	3	4	26	3	4	3	4	4	18	3	4	3	10	4	4	8
1	1	1	1	2	3	2	11	4	4	2	3	4	17	2	3	3	8	1	2	3
3	2	1	2	3	3	2	16	2	4	3	3	4	16	4	4	3	11	3	3	6
1	1	1	3	2	2	2	12	3	4	2	4	3	16	2	2	2	6	1	2	3
1	1	1	3	1	1	1	9	5	1	1	1	3	11	3	3	3	9	3	2	5
2	2	1	1	2	2	1	11	3	5	3	5	5	21	2	3	5	10	3	1	4
2	2	2	2	2	2	2	14	2	2	2	2	2	10	2	2	2	6	2	2	4
2	2	2	2	3	3	2	16	4	5	3	3	5	20	2	3	3	8	3	3	6
2	2	2	2	2	2	2	14	2	2	2	2	2	10	2	2	2	6	2	2	4
2	1	1	1	2	1	2	10	2	4	2	3	3	14	1	1	1	3	1	1	2
3	3	3	3	3	3	3	21	3	3	3	3	3	15	3	3	3	9	3	3	6
1	1	1	1	1	1	1	7	2	5	5	2	2	16	2	2	2	6	2	2	4
1	2	2	3	3	2	3	16	4	3	4	3	4	18	4	4	4	12	3	3	6
1	1	1	3	4	1	3	14	4	5	2	2	5	18	1	1	1	3	1	1	2
3	3	1	1	5	4	3	20	5	3	3	3	5	19	3	3	3	9	3	5	8
2	2	1	1	2	2	2	12	4	4	2	3	2	15	2	3	3	8	1	1	2
1	3	3	2	4	4	2	19	2	4	4	3	2	15	3	3	4	10	4	4	8
2	2	1	2	3	2	2	14	5	4	1	1	4	15	4	4	4	12	2	2	4
1	1	1	2	2	2	3	12	2	2	2	2	3	11	2	1	2	5	2	3	5
1	1	1	1	1	1	2	8	2	2	1	1	1	7	2	2	2	6	1	1	2
1	2	2	2	3	2	2	14	3	4	3	3	4	17	3	3	4	10	4	1	5
2	2	1	1	1	2	4	13	1	1	1	3	4	10	3	3	3	9	2	1	3
1	1	1	1	1	1	3	9	3	1	3	3	3	13	3	3	3	9	3	3	6
2	1	1	2	1	2	2	11	3	4	1	1	2	11	2	2	3	7	2	2	4
1	1	1	1	2	2	3	11	3	4	4	3	2	16	1	2	3	6	2	2	4
2	1	1	1	2	2	1	10	1	1	1	1	2	6	1	1	3	5	1	1	2
3	3	3	3	3	3	3	21	3	3	3	3	3	15	3	3	3	9	3	3	6
3	3	3	3	3	3	3	21	3	3	3	3	3	15	3	3	3	9	3	3	6
1	1	1	2	2	2	2	11	1	1	1	1	1	5	1	1	3	5	2	2	4
2	1	1	1	1	2	1	9	3	2	1	2	3	11	1	1	2	4	1	1	2
3	3	3	3	3	3	3	21	3	3	3	3	3	15	3	3	3	9	3	3	6
2	3	2	3	3	3	3	19	3	3	3	3	3	15	3	3	3	9	3	3	6
1	1	1	1	1	1	1	7	5	5	5	5	5	25	1	2	4	7	1	2	3
3	1	1	1	2	3	1	12	4	4	3	2	4	17	1	3	3	7	3	2	5
2	2	1	1	2	2	3	13	4	4	1	2	4	15	1	2	3	6	2	1	3
1	2	2	2	2	2	2	13	2	2	2	2	2	10	2	2	2	6	2	2	4
1	1	1	1	1	1	3	9	2	4	3	3	3	15	3	3	3	9	1	2	3
1	1	1	1	1	1	1	7	3	3	2	2	3	13	1	1	1	3	2	2	4
2	2	3	1	4	3	3	18	2	4	1	2	3	12	1	1	3	5	3	4	7
2	2	2	1	2	3	3	15	2	5	2	3	1	13	1	1	2	4	2	4	6
1	1	1	1	1	2	1	8	2	1	1	1	2	7	1	1	1	3	1	1	2
1	2	1	1	2	2	2	11	4	5	5	5	5	24	2	2	2	6	2	2	4
2	1	1	2	3	2	2	13	2	2	2	1	2	9	2	1	3	6	2	2	4
4	4	3	2	2	3	2	20	2	2	2	3	3	12	2	2	2	6	2	2	4
1	1	1	2	4	4	4	17	1	5	1	2	2	11	1	2	3	6	2	2	4
1	1	1	2	2	2	1	10	1	1	1	1	2	6	1	1	2	4	2	2	4
2	3	1	1	3	4	2	16	2	4	3	3	2	14	2	2	2	6	2	3	5
1	2	1	1	5	5	3	18	2	5	2	5	5	19	2	2	5	9	3	4	7
2	2	1	1	2	2	2	12	2	2	2	2	2	10	2	2	3	7	2	2	4
2	2	1	2	2	2	3	14	2	2	2	2	2	10	2	2	4	8	2	2	4
1	1	1	1	1	1	2	8	2	4	2	2	4	14	2	2	2	6	2	1	3
1	1	1	1	1	2	1	8	4	5	5	5	5	24	5	5	5	15	2	2	4
3	2	1	1	2	3	3	15	3	3	3	3	4	16	1	2	3	6	3	2	5
2	1	1	1	2	2	1	10	1	1	1	1	1	5	1	1	1	3	1	2	3
1	1	1	1	2	2	2	10	3	2	1	2	3	11	2	2	2	6	2	2	4
3	3	3	3	3	2	4	21	4	3	3	3	3	16	3	3	2	8	2	3	5
2	3	1	2	3	3	3	17	3	4	2	2	2	13	1	1	1	3	2	1	3
2	1	1	3	1	2	2	12	3	3	2	1	2	11	2	1	2	5	2	1	3
2	2	1	1	5	4	2	17	1	5	1	2	5	14	1	1	5	7	5	5	10
1	1	1	2	2	2	2	11	4	3	4	3	3	17	2	2	3	7	2	2	4
2	2	1	1	2	2	2	12	3	4	2	2	1	12	1	1	3	5	2	1	3
1	1	1	1	2	1	1	8	2	2	1	1	2	8	1	1	1	3	1	1	2
1	1	1	5	3	1	1	13	3	1	3	3	3	13	1	1	5	7	1	1	2
2	1	1	2	3	3	2	14	3	5	4	3	3	18	2	2	2	6	3	3	6
1	1	1	1	2	1	4	11	2	5	1	1	2	11	2	2	3	7	1	1	2
2	2	2	2	2	2	2	14	4	5	3	3	4	19	2	2	2	6	2	2	4
1	1	1	1	2	2	1	9	4	5	3	4	3	19	1	1	4	6	1	2	3
5	2	1	1	5	1	3	18	3	3	3	1	1	11	1	1	1	3	1	3	4
3	2	1	1	2	2	2	13	2	2	2	2	2	10	2	2	2	6	2	2	4
2	1	1	1	3	1	3	12	1	1	1	1	3	7	1	3	2	6	1	1	2
2	2	2	3	2	2	1	14	2	1	2	2	1	8	1	2	2	5	1	1	2
1	1	1	5	3	3	5	19	4	5	1	3	1	14	3	3	3	9	3	5	8
4	1	1	2	5	1	2	16	5	2	2	2	2	13	3	3	3	9	1	1	2
2	2	1	4	5	5	4	23	4	5	2	2	5	18	1	1	1	3	1	1	2
1	1	1	1	1	1	1	7	1	1	1	1	1	5	1	1	2	4	2	1	3
2	2	2	5	3	3	1	18	4	5	3	4	5	21	3	3	3	9	1	1	2
2	1	2	2	2	2	1	12	2	5	1	2	2	12	3	3	3	9	2	3	5
2	1	1	1	2	2	1	10	2	1	1	3	5	12	3	2	3	8	2	1	3
2	1	1	5	5	3	3	20	2	5	4	3	5	19	2	1	5	8	3	1	4
1	1	1	5	3	3	1	15	1	1	1	1	3	7	1	1	2	4	1	1	2
3	3	3	3	3	3	3	21	3	3	3	3	3	15	3	3	3	9	3	3	6
3	3	1	1	2	4	1	15	5	5	5	3	5	23	1	1	1	3	1	3	4
3	3	3	3	3	3	3	21	3	3	3	3	3	15	3	3	3	9	3	3	6
2	1	1	1	2	1	1	9	2	2	1	1	1	7	1	1	2	4	2	2	4
2	2	2	2	2	2	2	14	2	2	2	2	2	10	2	2	2	6	2	2	4
2	2	2	1	3	1	3	14	4	4	3	3	2	16	5	4	5	14	3	2	5
1	1	1	1	1	1	3	9	1	1	1	1	1	5	3	3	3	9	3	3	6
1	1	1	2	1	1	2	9	1	2	1	1	3	8	1	2	1	4	1	1	2
2	1	2	1	1	2	2	11	1	1	2	1	1	6	1	1	2	4	1	2	3
1	1	1	2	2	2	1	10	2	1	2	2	1	8	1	2	2	5	2	2	4
1	1	1	1	1	1	1	7	1	5	2	2	1	11	1	1	3	5	2	1	3
2	1	1	1	1	1	2	9	2	2	1	1	3	9	1	1	1	3	1	1	2
1	1	1	1	2	2	3	11	2	5	2	2	5	16	3	2	2	7	2	2	4
1	1	1	1	1	1	1	7	2	2	1	1	2	8	2	2	2	6	1	1	2
3	1	1	1	1	1	1	9	2	1	2	1	2	8	3	3	2	8	1	1	2
3	3	2	3	3	3	3	20	2	1	3	3	3	12	3	2	2	7	2	2	4
2	1	1	1	1	1	1	8	1	1	1	1	2	6	1	1	1	3	1	1	2
2	1	1	1	1	1	2	9	1	4	2	3	5	15	3	3	3	9	3	3	6
2	2	1	1	2	2	2	12	3	4	3	2	3	15	2	2	4	8	3	3	6
3	1	3	2	2	2	2	15	2	2	2	2	2	10	2	2	2	6	2	2	4
2	1	2	1	2	1	2	11	5	5	2	1	3	16	2	2	2	6	1	2	3
5	5	1	1	1	1	1	15	3	1	1	1	5	11	1	1	1	3	1	1	2
4	4	4	4	4	4	4	28	4	4	4	4	4	20	4	4	4	12	4	4	8
1	1	1	1	1	1	1	7	1	2	2	2	2	9	1	1	3	5	1	1	2
2	2	1	1	2	1	2	11	2	2	1	2	3	10	1	1	2	4	2	1	3
3	3	3	1	4	4	3	21	2	1	3	2	1	9	3	3	3	9	4	3	7
1	1	1	5	4	3	3	18	5	4	5	4	4	22	5	5	5	15	3	3	6
2	2	2	4	3	2	2	17	2	1	3	2	5	13	3	3	3	9	2	3	5
2	1	1	1	2	1	2	10	2	2	2	3	2	11	2	2	2	6	1	2	3
3	3	3	3	3	3	3	21	3	3	3	3	3	15	3	3	3	9	3	3	6
3	3	3	3	3	3	3	21	3	3	3	3	3	15	3	3	5	11	3	3	6
3	3	3	3	3	3	3	21	3	3	3	3	3	15	3	3	3	9	3	3	6
3	3	3	3	3	3	3	21	3	3	3	3	3	15	3	3	3	9	3	3	6
3	3	3	2	3	3	3	20	3	3	3	3	3	15	2	3	3	8	2	3	5
3	3	3	3	3	3	3	21	3	3	3	3	3	15	3	3	3	9	3	3	6
1	1	1	1	1	2	1	8	1	1	1	1	1	5	1	1	1	3	1	1	2
3	3	3	3	3	3	3	21	3	3	3	3	3	15	3	3	3	9	3	3	6
2	3	3	3	3	3	3	20	3	3	3	3	3	15	3	3	3	9	3	3	6
2	2	2	1	2	2	2	13	4	3	2	2	5	16	4	4	4	12	4	2	6
3	3	3	3	3	3	3	21	3	3	3	3	3	15	3	3	3	9	3	3	6
3	3	3	3	3	3	3	21	3	3	3	3	3	15	3	3	3	9	3	3	6
1	1	1	1	1	1	1	7	2	2	2	2	5	13	5	5	5	15	5	2	7
1	1	1	1	2	2	2	10	2	2	2	3	2	11	2	2	3	7	3	3	6
1	1	1	2	2	2	2	11	2	2	2	1	2	9	2	2	2	6	1	1	2
2	2	1	1	2	2	2	12	3	5	3	5	5	21	3	3	3	9	3	3	6
1	1	1	5	1	4	1	14	5	5	3	1	3	17	3	1	1	5	1	1	2
3	3	3	3	3	3	3	21	3	3	3	3	3	15	3	3	3	9	3	3	6
2	2	1	1	4	3	2	15	4	3	3	2	2	14	3	3	4	10	2	1	3
1	1	1	1	2	3	2	11	4	5	3	3	4	19	2	2	4	8	2	3	5
3	3	3	3	2	2	2	18	4	5	2	2	3	16	3	2	3	8	1	2	3
1	1	1	1	1	1	2	8	2	2	2	2	2	10	2	2	2	6	2	2	4
2	1	1	1	2	2	2	11	3	3	2	2	2	12	3	3	3	9	2	2	4
1	1	1	1	1	1	1	7	1	5	3	3	3	15	3	3	3	9	2	1	3
2	2	2	2	2	2	2	14	2	2	2	2	2	10	2	2	2	6	2	2	4
3	3	1	1	1	2	1	12	4	1	2	2	2	11	3	3	3	9	3	1	4
1	2	1	1	2	2	1	10	5	5	5	4	4	23	4	2	2	8	2	3	5
3	3	3	3	3	3	3	21	3	3	3	3	3	15	4	3	3	10	3	3	6
1	1	1	1	3	2	2	11	3	5	3	1	2	14	1	1	1	3	3	3	6
2	2	2	1	3	3	2	15	5	5	4	4	4	22	1	1	3	5	2	2	4
2	2	1	1	2	1	2	11	3	2	1	2	2	10	3	3	3	9	3	3	6
3	1	1	1	5	4	3	18	5	5	2	1	5	18	1	1	1	3	1	1	2
1	1	1	1	1	1	1	7	1	1	1	2	2	7	2	2	2	6	1	1	2
2	2	1	2	3	2	1	13	4	4	4	4	5	21	5	5	5	15	5	5	10
3	3	3	3	3	3	3	21	3	3	3	3	3	15	3	3	3	9	3	3	6
1	1	1	1	2	2	2	10	1	5	2	2	2	12	1	2	2	5	2	2	4
1	1	1	1	2	1	1	8	5	5	2	2	5	19	1	1	1	3	1	1	2
3	3	3	2	4	4	1	20	3	4	3	3	2	15	1	2	4	7	4	4	8
1	1	1	2	2	2	2	11	2	2	2	2	2	10	3	3	3	9	1	2	3
3	3	1	3	4	4	3	21	4	4	4	4	5	21	2	2	3	7	3	4	7
2	2	1	2	2	2	1	12	2	1	1	1	1	6	4	4	4	12	3	1	4
3	3	3	2	2	3	2	18	2	3	2	3	3	13	2	2	3	7	2	3	5
2	1	1	2	2	2	2	12	5	5	5	5	5	25	3	2	3	8	2	2	4
2	2	1	1	1	2	2	11	2	1	2	2	2	9	2	2	3	7	1	2	3
2	1	1	2	2	2	1	11	3	3	2	1	2	11	2	2	2	6	2	1	3
1	1	1	1	1	1	1	7	1	1	1	1	1	5	1	1	2	4	1	1	2
2	2	1	1	2	3	3	14	2	3	2	2	3	12	3	1	1	5	2	3	5
3	2	1	1	2	2	2	13	2	5	1	1	2	11	3	2	2	7	1	2	3
1	1	1	1	1	1	3	9	5	5	3	2	3	18	1	1	3	5	2	1	3
2	2	1	2	4	4	4	19	5	5	5	5	5	25	4	4	4	12	3	3	6
1	1	1	1	1	1	2	8	1	5	5	5	3	19	3	3	2	8	1	1	2
2	1	1	1	4	3	1	13	2	2	2	2	2	10	2	2	3	7	3	3	6
1	1	1	2	2	1	1	9	2	2	1	1	1	7	1	1	1	3	1	1	2
1	1	1	1	2	2	2	10	3	5	3	3	3	17	2	2	4	8	1	1	2
2	1	2	1	2	2	2	12	3	3	3	3	3	15	2	3	2	7	3	2	5
2	4	3	3	4	4	2	22	4	5	3	5	4	21	4	4	3	11	3	3	6
2	2	1	2	2	2	3	14	5	5	2	2	3	17	1	1	2	4	1	2	3
3	3	3	3	3	3	3	21	3	3	3	3	3	15	3	3	3	9	3	3	6
2	2	2	1	2	3	2	14	2	4	2	2	4	14	3	4	4	11	3	2	5
2	2	1	1	2	2	2	12	2	2	1	2	2	9	1	1	1	3	1	1	2
1	1	1	1	1	1	1	7	1	5	4	5	5	20	4	4	5	13	2	4	6
2	1	2	1	2	2	3	13	5	5	5	5	5	25	3	3	3	9	1	1	2
1	1	1	1	1	1	1	7	2	5	1	5	5	18	2	2	1	5	1	1	2
2	2	1	3	4	4	4	20	5	5	5	5	5	25	5	5	5	15	5	5	10
1	1	1	1	1	1	1	7	5	5	3	1	1	15	2	1	1	4	1	4	5
3	3	4	4	4	4	4	26	4	4	4	4	4	20	4	4	4	12	4	4	8
4	4	4	4	4	4	4	28	4	5	5	5	4	23	3	4	5	12	4	4	8
3	1	1	1	1	1	1	9	4	1	3	1	5	14	3	3	3	9	3	3	6
1	1	2	1	2	2	2	11	2	5	3	4	2	16	2	3	3	8	1	2	3
2	2	2	3	3	3	2	17	3	3	4	3	4	17	3	4	2	9	4	2	6
2	2	2	2	2	2	2	14	2	3	3	3	2	13	2	1	1	4	1	1	2
1	1	3	5	5	5	5	25	5	5	5	5	5	25	1	1	5	7	4	5	9
1	2	1	1	3	2	3	13	4	5	5	5	5	24	3	4	4	11	2	2	4
3	2	2	2	2	2	2	15	2	2	2	2	2	10	2	2	3	7	3	2	5
1	1	1	3	3	2	3	14	2	1	1	1	4	9	2	2	2	6	1	1	2
1	1	1	1	1	1	1	7	5	5	5	5	5	25	1	1	1	3	1	1	2
1	2	1	1	2	2	1	10	4	5	5	5	5	24	2	2	3	7	1	1	2
1	1	1	1	1	1	1	7	2	5	1	1	3	12	2	2	2	6	1	1	2
1	2	2	1	2	2	4	14	4	4	3	3	4	18	2	2	4	8	2	2	4
2	2	1	2	2	1	2	12	3	2	1	1	2	9	1	1	1	3	1	1	2
2	1	1	1	1	1	4	11	4	1	1	1	1	8	1	1	1	3	1	1	2
2	1	1	1	3	2	2	12	3	2	2	2	2	11	3	3	3	9	3	3	6
1	1	1	2	2	2	1	10	1	3	1	5	3	13	3	3	5	11	1	1	2
2	1	1	2	3	3	2	14	2	4	2	2	2	12	4	3	4	11	2	2	4
1	2	1	1	2	2	2	11	2	1	1	1	2	7	1	2	2	5	2	2	4
1	3	1	1	1	1	1	9	2	5	1	1	1	10	1	1	1	3	1	1	2
1	1	1	1	1	1	1	7	1	1	1	1	1	5	1	2	2	5	1	1	2
2	2	1	1	3	2	2	13	3	2	2	2	3	12	1	2	2	5	2	2	4
1	1	1	1	2	2	4	12	1	1	2	2	2	8	1	1	2	4	1	1	2
1	1	1	1	2	2	1	9	3	5	3	3	3	17	4	3	3	10	2	2	4
2	1	1	1	2	2	2	11	1	1	1	1	3	7	2	2	2	6	2	2	4
1	1	1	1	2	1	1	8	1	1	1	1	1	5	1	1	1	3	1	1	2
1	1	1	2	2	1	1	9	1	3	1	1	3	9	1	1	3	5	1	1	2
1	1	1	1	1	1	1	7	5	5	5	3	3	21	3	3	3	9	3	3	6
5	1	1	1	1	1	1	11	5	5	5	5	5	25	5	5	5	15	5	2	7
1	1	1	1	2	1	1	8	1	1	1	1	1	5	1	1	1	3	1	1	2
1	1	1	2	2	1	1	9	2	1	1	1	2	7	1	1	2	4	1	1	2
3	3	3	3	3	3	3	21	3	3	3	3	3	15	3	3	3	9	3	3	6
1	1	1	1	1	3	1	9	3	3	4	3	4	17	3	3	4	10	3	2	5
2	1	1	1	2	1	1	9	2	2	2	2	2	10	2	2	2	6	2	2	4
2	2	2	2	2	2	2	14	2	2	2	2	2	10	3	2	3	8	2	3	5
1	1	1	1	2	2	2	10	2	2	1	1	2	8	2	3	2	7	1	2	3
1	1	1	1	2	1	1	8	1	1	1	1	1	5	1	1	1	3	1	1	2
1	1	1	1	1	1	1	7	1	1	1	1	3	7	1	1	1	3	1	1	2
1	1	1	1	1	1	1	7	4	3	2	1	4	14	1	1	2	4	1	1	2
5	3	3	3	3	2	1	20	4	3	1	1	3	12	2	2	2	6	2	2	4
1	1	1	1	2	1	1	8	1	1	1	1	1	5	1	2	2	5	1	1	2
2	1	1	1	3	2	1	11	2	5	4	4	3	18	3	2	2	7	2	1	3
1	1	1	1	3	3	3	13	5	5	5	5	3	23	1	3	3	7	3	3	6
1	1	1	1	1	1	1	7	1	1	1	3	5	11	2	2	3	7	2	2	4
1	1	1	1	2	2	1	9	2	1	3	3	4	13	2	1	3	6	2	2	4
1	1	1	1	1	1	1	7	1	1	1	1	2	6	1	1	2	4	1	1	2
1	2	1	1	3	2	2	12	4	4	3	3	4	18	2	2	2	6	1	2	3
1	1	1	1	1	1	1	7	1	1	4	3	4	13	2	5	5	12	3	2	5
1	1	2	1	1	1	3	10	3	3	1	1	3	11	2	2	2	6	2	2	4
1	1	1	1	2	2	3	11	2	3	1	2	2	10	2	2	3	7	1	1	2
3	3	3	3	3	3	3	21	3	3	3	3	3	15	3	3	3	9	3	3	6
2	2	1	2	2	3	4	16	1	5	1	2	5	14	2	2	3	7	1	1	2
2	2	2	3	3	2	2	16	3	5	3	3	3	17	3	3	3	9	3	3	6
4	4	4	4	4	4	4	28	4	4	4	4	4	20	4	4	4	12	4	4	8
2	2	2	3	3	2	2	16	2	2	2	2	2	10	2	2	2	6	2	2	4
1	1	1	1	1	1	1	7	3	3	1	1	2	10	2	1	1	4	1	1	2
1	1	1	1	2	3	1	10	3	3	2	2	2	12	2	2	2	6	2	2	4
1	1	1	2	2	1	5	13	4	1	1	1	2	9	2	1	1	4	1	1	2
1	1	1	2	2	2	1	10	2	3	2	2	3	12	1	1	2	4	1	1	2
2	2	1	1	2	1	2	11	1	4	2	1	2	10	1	1	3	5	1	1	2
2	2	1	2	3	4	2	16	1	2	2	2	2	9	2	2	2	6	2	2	4
1	1	1	1	2	2	1	9	4	2	2	1	5	14	4	4	5	13	2	2	4
4	4	4	4	4	4	4	28	4	4	4	4	4	20	4	4	4	12	4	4	8
1	1	1	1	1	1	2	8	1	1	1	1	3	7	1	1	3	5	2	2	4
2	2	1	1	2	2	1	11	2	2	2	2	2	10	2	2	2	6	2	1	3
2	2	1	2	1	2	1	11	3	3	1	1	3	11	1	1	2	4	1	1	2
3	1	1	1	2	2	2	12	3	2	1	1	3	10	2	2	3	7	2	2	4
3	3	3	3	3	3	3	21	3	3	3	3	3	15	3	3	3	9	3	3	6
3	2	2	2	2	2	1	14	2	2	2	1	2	9	2	2	2	6	2	2	4
2	2	1	1	2	3	2	13	3	5	2	2	2	14	1	1	3	5	2	2	4
1	1	1	2	2	1	2	10	2	1	2	2	3	10	2	2	2	6	3	3	6
3	3	1	2	2	2	1	14	4	4	2	2	3	15	4	4	4	12	2	1	3
2	2	2	1	3	3	3	16	3	5	4	3	3	18	2	2	3	7	2	1	3
2	1	1	1	1	1	2	9	2	1	1	1	1	6	1	1	2	4	1	1	2
2	2	1	1	2	2	1	11	2	5	2	2	2	13	1	2	3	6	1	1	2
1	1	1	1	3	3	2	12	5	4	2	2	5	18	3	3	5	11	2	2	4
3	3	3	2	4	4	2	21	2	4	2	2	2	12	1	1	4	6	1	4	5
2	2	2	1	1	1	1	10	3	3	3	2	4	15	3	3	4	10	1	2	3
1	1	1	2	2	2	2	11	2	3	2	3	3	13	3	3	3	9	3	3	6
2	1	1	1	1	2	1	9	3	3	2	2	3	13	3	3	3	9	3	2	5
1	1	1	1	1	1	1	7	5	5	3	3	3	19	2	1	1	4	1	1	2
1	1	1	1	2	2	1	9	3	2	1	2	2	10	1	2	2	5	1	2	3
2	1	1	1	2	2	3	12	1	1	1	2	2	7	2	2	1	5	1	1	2
1	1	1	2	2	1	1	9	3	5	4	3	3	18	1	1	2	4	1	1	2
1	1	1	1	1	2	3	10	5	5	4	4	4	22	4	4	4	12	3	2	5
1	1	1	1	2	2	2	10	5	5	3	4	3	20	1	1	4	6	1	1	2
3	3	3	3	3	3	3	21	3	3	3	3	3	15	3	3	3	9	3	3	6
1	2	2	2	2	2	3	14	4	5	4	5	4	22	3	3	4	10	2	2	4
2	2	2	1	2	2	2	13	3	2	1	1	3	10	1	1	3	5	2	2	4
1	1	1	3	1	1	1	9	1	1	1	1	1	5	1	1	2	4	2	2	4
2	1	1	2	2	2	2	12	3	5	5	2	3	18	1	3	3	7	1	1	2
4	4	4	4	4	4	4	28	4	4	4	4	4	20	4	4	4	12	4	4	8
1	1	1	1	1	1	1	7	1	3	1	2	4	11	1	1	3	5	2	1	3
3	1	1	1	1	1	1	9	2	2	3	2	2	11	3	3	3	9	3	2	5
2	1	1	1	1	1	1	8	3	5	3	2	4	17	1	2	4	7	2	2	4
1	1	1	1	1	1	1	7	2	2	2	2	2	10	2	2	2	6	2	2	4
3	3	3	3	3	3	3	21	3	3	3	3	3	15	3	3	3	9	3	3	6
2	1	1	1	3	2	2	12	1	1	1	1	1	5	1	1	1	3	1	1	2
1	1	1	5	5	5	3	21	2	2	3	3	5	15	3	3	5	11	2	2	4
1	2	1	2	2	2	1	11	2	2	2	1	2	9	2	2	2	6	1	2	3
1	1	2	2	3	2	2	13	4	4	4	4	4	20	3	3	3	9	3	3	6
3	3	3	3	3	3	3	21	3	3	3	3	3	15	3	3	3	9	3	3	6
2	3	1	3	3	3	3	18	2	4	3	3	4	16	2	2	3	7	3	3	6
2	2	2	2	2	2	2	14	2	2	2	2	2	10	2	2	2	6	2	2	4
2	1	2	2	2	2	2	13	5	5	2	2	5	19	2	2	5	9	3	2	5
1	1	1	1	1	1	1	7	2	2	1	1	2	8	2	2	2	6	1	1	2
1	1	1	1	1	1	1	7	3	5	1	2	3	14	1	1	3	5	1	1	2
3	3	3	3	3	3	3	21	3	3	3	3	3	15	3	3	3	9	3	3	6
2	2	2	2	2	2	2	14	2	2	2	2	2	10	2	2	2	6	2	2	4
1	1	1	1	2	1	1	8	2	2	1	2	2	9	1	1	3	5	1	1	2
2	2	1	4	3	2	2	16	1	1	1	1	1	5	2	2	2	6	1	1	2
3	3	3	3	3	3	3	21	3	3	3	3	3	15	3	3	3	9	3	3	6
3	2	2	2	2	2	2	15	2	2	2	2	2	10	2	2	2	6	2	2	4
1	1	1	3	3	3	3	15	3	3	3	3	3	15	3	3	3	9	3	3	6
2	2	2	1	3	2	3	15	1	2	3	3	5	14	3	3	3	9	1	3	4
5	5	5	5	5	5	5	35	5	5	5	5	5	25	5	5	5	15	5	1	6
2	2	2	3	2	3	3	17	3	3	3	3	2	14	3	2	2	7	3	2	5
1	1	1	1	1	1	1	7	1	1	1	3	1	7	1	1	1	3	1	1	2
3	3	3	3	3	3	3	21	3	3	3	3	3	15	3	3	3	9	3	3	6
1	1	1	1	2	3	3	12	2	2	1	2	2	9	2	3	3	8	3	1	4
3	2	3	1	2	2	2	15	2	2	2	2	2	10	2	2	2	6	2	2	4
3	2	1	1	2	2	1	12	3	1	1	1	3	9	2	2	2	6	1	1	2
1	1	1	2	2	1	1	9	1	1	1	1	3	7	1	3	3	7	2	1	3
1	1	1	1	1	1	1	7	1	1	1	1	3	7	1	1	3	5	1	1	2
2	1	1	1	1	1	1	8	2	5	2	1	1	11	1	1	2	4	1	1	2
1	1	1	2	1	1	1	8	1	1	1	1	1	5	1	1	1	3	1	1	2
3	3	3	4	3	3	3	22	3	3	3	3	3	15	3	3	3	9	3	3	6
1	1	1	1	1	1	1	7	5	5	5	5	1	21	1	1	3	5	1	1	2
1	1	1	1	1	1	5	11	5	5	5	5	3	23	1	1	3	5	3	1	4
1	1	1	1	2	2	1	9	1	1	1	1	3	7	1	1	1	3	1	1	2
2	2	2	1	3	3	3	16	4	5	3	3	4	19	3	3	3	9	2	2	4
1	1	1	1	2	4	3	13	2	5	1	1	1	10	1	3	4	8	1	1	2
2	2	2	5	3	3	3	20	3	3	3	3	3	15	3	3	3	9	3	3	6
2	2	2	3	3	3	3	18	2	5	3	3	4	17	2	3	4	9	3	3	6
2	2	2	2	2	2	2	14	2	2	2	2	2	10	2	2	2	6	2	2	4
2	1	1	2	1	1	1	9	2	2	2	3	2	11	2	2	3	7	2	1	3
1	1	1	1	2	2	2	10	4	5	5	3	5	22	3	3	3	9	1	2	3
3	2	1	1	3	2	2	14	2	4	3	1	2	12	1	1	3	5	1	1	2
4	4	4	4	4	4	4	28	4	4	4	4	4	20	4	4	4	12	4	4	8
1	1	1	1	1	1	4	10	3	2	2	2	3	12	2	3	2	7	3	2	5
1	1	1	1	1	1	1	7	3	1	1	1	2	8	1	1	1	3	2	1	3
1	1	1	1	1	1	1	7	1	5	1	1	2	10	1	1	2	4	1	1	2
1	1	1	1	2	1	2	9	1	1	1	1	1	5	2	2	2	6	1	1	2
2	1	1	3	2	2	2	13	4	2	1	1	3	11	4	4	3	11	1	2	3
1	1	1	1	2	1	1	8	2	1	1	1	1	6	1	1	1	3	1	1	2
1	1	1	2	2	1	1	9	1	2	1	2	1	7	2	2	2	6	2	1	3
1	1	1	1	1	3	2	10	3	5	3	3	2	16	1	1	3	5	2	1	3
2	2	2	2	2	2	2	14	2	2	2	2	2	10	2	2	2	6	2	2	4
3	3	3	3	3	3	3	21	3	3	3	3	3	15	3	3	3	9	3	3	6
4	1	1	2	1	1	1	11	1	1	1	1	1	5	1	1	1	3	1	1	2
1	5	2	2	2	2	2	16	3	1	1	1	1	7	2	2	2	6	2	2	4
1	1	1	2	2	2	2	11	3	3	1	3	5	15	3	3	5	11	2	3	5
2	1	1	1	2	1	3	11	1	2	1	2	4	10	1	1	2	4	1	1	2
1	1	1	1	2	1	1	8	2	1	2	1	2	8	1	2	2	5	2	1	3
1	1	1	1	1	1	1	7	1	1	1	1	1	5	2	2	2	6	1	1	2
1	1	1	1	5	1	1	11	2	3	1	1	5	12	3	3	2	8	1	1	2
3	3	3	3	3	3	3	21	3	3	3	3	3	15	3	3	3	9	3	3	6
1	1	1	1	1	1	1	7	2	2	2	2	2	10	2	2	2	6	2	1	3
2	1	1	1	4	1	1	11	5	5	4	5	5	24	1	1	4	6	1	2	3
1	1	1	1	1	1	1	7	1	1	1	3	3	9	3	3	3	9	3	3	6
2	1	1	1	2	2	2	11	5	2	1	1	3	12	2	2	2	6	1	2	3
2	1	1	1	1	1	1	8	2	2	2	1	2	9	2	2	2	6	2	2	4
3	2	1	1	2	1	1	11	2	5	2	1	3	13	4	4	4	12	1	1	2
1	1	1	2	2	2	2	11	3	3	2	3	5	16	1	1	2	4	2	1	3
2	2	2	2	2	2	2	14	2	2	2	2	2	10	2	2	2	6	2	2	4
4	4	2	2	2	2	2	18	4	5	2	2	3	16	3	3	3	9	2	1	3
3	2	2	1	2	2	3	15	1	2	2	2	1	8	2	2	2	6	2	2	4
2	2	2	1	3	3	2	15	2	5	2	2	2	13	2	2	4	8	4	3	7
2	2	2	2	2	2	2	14	2	2	2	2	2	10	2	2	2	6	2	2	4
3	3	3	3	3	3	3	21	3	3	3	3	3	15	3	3	3	9	3	3	6
3	3	3	1	2	2	2	16	2	2	2	2	2	10	2	2	2	6	3	3	6
1	1	1	1	1	1	1	7	2	1	1	1	3	8	3	3	3	9	1	1	2
1	1	1	1	1	1	1	7	1	3	2	2	2	10	1	1	2	4	1	1	2
1	1	1	1	1	2	2	9	3	3	3	3	3	15	3	3	4	10	1	1	2
4	4	4	4	4	4	4	28	4	4	4	4	4	20	4	4	4	12	4	4	8
1	1	1	1	1	1	1	7	2	2	1	1	2	8	1	1	2	4	1	1	2
3	2	2	2	2	2	2	15	2	5	3	3	3	16	3	3	3	9	3	3	6
1	1	2	1	2	2	2	11	2	3	3	3	2	13	3	3	3	9	2	2	4
1	1	1	1	1	1	1	7	1	3	1	1	1	7	1	1	3	5	1	1	2
1	1	1	1	1	1	1	7	1	1	2	2	2	8	1	1	2	4	1	1	2
2	2	1	2	5	5	2	19	5	5	3	4	5	22	5	2	3	10	2	2	4
1	1	1	2	3	1	1	10	1	5	5	5	5	21	5	5	5	15	1	1	2
1	1	1	1	2	2	2	10	2	1	1	1	3	8	2	2	2	6	1	1	2
1	1	1	2	2	2	2	11	4	5	1	1	3	14	2	2	3	7	2	1	3
3	3	3	4	4	4	4	25	4	5	4	4	5	22	3	3	5	11	5	3	8
1	1	1	1	1	1	1	7	2	5	5	3	5	20	5	5	5	15	1	1	2
3	2	1	1	2	2	3	14	2	2	2	2	2	10	2	2	2	6	1	1	2
1	1	1	1	1	1	1	7	1	1	1	1	3	7	1	1	3	5	1	1	2
2	2	3	2	3	4	2	18	1	5	4	3	3	16	4	5	5	14	3	5	8
3	3	3	3	3	3	3	21	3	3	3	3	3	15	3	3	3	9	3	3	6
1	1	1	3	3	3	3	15	1	2	1	1	3	8	3	3	3	9	2	2	4
1	1	1	1	1	1	1	7	1	3	1	2	2	9	1	1	3	5	2	2	4
4	4	4	4	4	4	4	28	3	3	4	3	3	16	3	3	4	10	4	4	8
3	3	3	3	3	3	3	21	3	3	3	3	3	15	3	3	3	9	3	3	6
3	3	1	5	4	2	3	21	3	5	2	2	4	16	2	2	2	6	1	1	2
3	2	1	1	2	2	1	12	3	5	2	2	3	15	2	2	3	7	1	1	2
2	2	2	2	3	3	1	15	3	2	2	2	2	11	2	2	2	6	2	1	3
1	1	1	5	2	2	2	14	2	2	2	2	2	10	2	2	2	6	2	2	4
3	3	3	3	3	3	3	21	3	3	3	3	3	15	3	3	3	9	3	3	6
1	1	1	2	2	2	3	12	4	4	2	3	4	17	1	2	4	7	1	1	2
2	2	2	2	2	2	2	14	2	2	2	2	2	10	2	2	2	6	2	2	4
1	1	1	1	2	2	1	9	4	1	2	2	2	11	2	2	3	7	3	1	4
1	2	1	3	2	2	2	13	2	1	1	1	3	8	2	3	2	7	2	2	4
1	1	1	1	2	1	1	8	1	1	1	1	1	5	1	1	1	3	1	1	2
2	2	2	2	3	3	3	17	3	2	2	3	3	13	3	3	3	9	3	3	6
2	1	1	1	1	1	1	8	1	1	1	1	1	5	2	1	1	4	1	1	2
1	1	1	1	1	1	2	8	5	4	4	4	4	21	4	2	2	8	2	2	4
1	2	1	1	2	2	2	11	2	2	2	2	2	10	2	2	2	6	1	1	2
1	1	1	1	3	5	3	15	3	5	5	3	3	19	3	3	3	9	3	3	6
2	2	2	2	2	2	2	14	2	2	2	2	2	10	2	2	2	6	2	2	4
2	3	2	2	2	2	2	15	2	2	2	2	2	10	2	2	3	7	3	3	6
2	2	1	2	3	2	2	14	2	2	1	2	1	8	2	2	2	6	1	1	2
2	1	1	1	3	2	1	11	3	5	3	3	5	19	3	2	2	7	4	4	8
1	1	1	1	2	2	1	9	2	2	1	2	2	9	1	1	1	3	2	1	3
1	1	1	1	1	1	1	7	1	5	3	3	3	15	2	1	1	4	1	1	2
3	2	1	3	3	2	3	17	1	5	1	1	2	10	1	1	2	4	1	1	2
3	3	3	3	3	3	3	21	3	3	3	3	3	15	3	3	3	9	3	3	6
1	1	1	1	1	1	1	7	3	1	1	1	1	7	1	1	1	3	1	1	2
1	1	1	1	3	3	1	11	1	3	2	3	4	13	1	2	2	5	1	2	3
3	3	3	3	3	3	3	21	3	3	3	3	3	15	3	3	3	9	3	3	6
3	3	3	2	3	2	2	18	3	3	3	3	3	15	3	3	3	9	3	3	6
1	1	1	1	1	5	1	11	2	1	1	1	1	6	1	1	1	3	1	1	2
4	2	2	2	2	2	2	16	2	2	2	2	2	10	2	2	2	6	2	2	4
3	3	3	3	3	3	3	21	3	3	3	3	3	15	3	3	3	9	3	3	6
1	1	1	1	2	1	1	8	2	3	2	2	2	11	1	1	1	3	1	1	2
3	1	1	1	2	1	1	10	2	5	1	1	2	11	2	2	2	6	1	1	2
2	1	1	1	2	2	3	12	2	2	2	1	3	10	2	2	3	7	2	2	4
1	2	2	3	2	3	2	15	3	3	3	2	2	13	2	2	2	6	2	2	4
1	1	1	1	3	3	1	11	1	5	3	1	1	11	2	2	5	9	1	2	3
1	1	1	1	1	1	1	7	2	1	1	1	3	8	1	1	1	3	1	1	2
1	1	1	1	2	1	1	8	3	3	2	3	3	14	2	2	2	6	1	2	3
1	1	1	1	1	1	1	7	3	3	2	3	3	14	3	3	2	8	4	5	9
1	1	2	1	2	2	1	10	4	5	2	2	3	16	1	1	2	4	1	1	2
3	3	3	1	2	2	2	16	2	5	1	2	5	15	1	1	1	3	1	1	2
3	3	3	3	3	3	3	21	3	3	3	3	3	15	3	3	3	9	3	3	6
1	1	1	1	1	4	1	10	1	1	1	1	1	5	2	3	4	9	3	3	6
1	1	1	1	2	2	2	10	1	1	2	1	1	6	2	2	4	8	2	1	3
1	1	1	1	1	1	1	7	1	1	1	1	2	6	1	1	1	3	1	1	2
2	2	1	1	2	2	3	13	3	1	2	2	3	11	3	2	2	7	3	2	5
1	1	1	1	1	1	1	7	2	2	2	2	1	9	1	1	2	4	1	1	2
1	1	1	1	2	2	2	10	2	4	1	3	2	12	1	3	3	7	2	1	3
2	2	1	1	2	2	2	12	2	2	2	2	2	10	2	2	2	6	2	2	4
3	1	1	1	1	1	1	9	1	1	1	1	1	5	1	1	2	4	1	1	2
2	2	2	2	2	2	2	14	2	2	2	2	2	10	2	2	2	6	2	2	4
1	1	1	2	2	2	1	10	2	2	1	2	2	9	1	2	3	6	1	1	2
2	1	1	1	2	1	1	9	1	1	1	1	2	6	3	3	2	8	1	1	2
1	1	1	1	2	2	1	9	1	1	1	1	1	5	1	1	1	3	1	1	2
1	1	1	1	5	3	1	13	5	4	5	5	4	23	1	1	4	6	4	5	9
2	2	2	2	2	2	2	14	2	2	4	4	4	16	1	1	2	4	2	2	4
2	1	1	1	1	2	2	10	4	3	1	3	2	13	2	2	2	6	2	2	4
4	3	2	2	2	3	2	18	4	3	3	2	4	16	4	2	4	10	1	3	4
1	1	1	1	2	2	2	10	1	4	1	1	5	12	2	2	2	6	1	2	3
1	2	1	1	2	1	1	9	1	5	4	2	2	14	2	2	2	6	1	2	3
2	1	1	1	2	2	3	12	4	4	3	2	4	17	1	1	3	5	1	1	2
2	2	2	1	3	2	1	13	2	2	2	2	2	10	2	3	3	8	2	2	4
2	2	1	1	1	1	2	10	1	3	1	1	1	7	1	1	3	5	1	1	2
2	1	1	2	3	2	3	14	3	3	4	4	4	18	4	4	4	12	4	3	7
1	1	1	1	1	1	1	7	2	4	1	1	2	10	1	2	2	5	1	1	2
2	2	1	2	3	2	3	15	3	4	3	2	3	15	3	3	3	9	3	3	6
2	3	3	1	4	3	3	19	5	5	4	4	5	23	3	3	4	10	4	4	8
2	2	3	2	3	2	3	17	2	3	2	3	4	14	2	2	3	7	3	3	6
1	1	1	1	1	1	1	7	1	1	1	1	1	5	2	2	2	6	2	2	4
2	3	2	2	3	4	3	19	3	5	4	3	5	20	1	1	2	4	3	3	6
1	1	1	1	1	1	3	9	2	2	3	3	2	12	2	1	1	4	1	1	2
1	1	1	1	2	2	1	9	1	3	2	2	5	13	2	3	3	8	1	1	2
2	1	1	2	2	2	2	12	3	4	3	2	3	15	2	2	3	7	1	2	3
2	3	2	2	3	5	3	20	2	3	3	4	2	14	2	1	3	6	3	3	6
3	3	3	3	3	3	3	21	3	3	3	3	3	15	3	3	3	9	3	3	6
1	1	1	2	1	1	1	8	1	1	1	1	2	6	1	1	1	3	1	1	2
2	1	1	1	2	1	2	10	1	3	1	1	4	10	1	2	1	4	1	2	3
3	3	3	3	3	3	3	21	3	3	3	3	3	15	3	3	3	9	3	3	6
3	3	3	3	3	3	3	21	3	3	3	3	3	15	3	3	3	9	3	5	8
1	1	1	1	1	1	1	7	3	1	2	2	2	10	2	2	2	6	2	2	4
1	1	1	1	1	1	1	7	1	5	3	3	5	17	3	3	3	9	3	1	4
3	3	2	3	3	2	3	19	3	3	2	2	3	13	3	2	2	7	3	3	6
1	1	1	1	1	1	1	7	1	1	1	1	1	5	1	1	3	5	2	1	3
1	1	1	1	1	1	1	7	1	5	2	2	2	12	2	2	2	6	2	2	4
2	1	1	2	2	1	1	10	2	1	2	3	2	10	3	3	4	10	2	2	4
2	1	1	1	1	1	1	8	4	5	4	5	5	23	2	2	3	7	2	2	4
3	3	3	3	3	3	3	21	3	3	3	3	3	15	3	3	3	9	3	3	6
1	1	1	1	2	1	1	8	2	2	1	1	1	7	2	2	3	7	1	2	3
1	1	1	1	1	1	1	7	1	2	1	1	1	6	2	2	2	6	2	2	4
1	1	1	1	1	1	2	8	3	5	3	4	5	20	3	2	2	7	2	1	3
1	1	1	1	1	1	1	7	1	1	1	1	1	5	1	3	3	7	1	1	2
1	1	1	1	1	1	1	7	3	5	2	2	5	17	1	1	5	7	1	1	2
1	1	1	1	1	1	1	7	5	5	2	1	3	16	1	1	3	5	1	1	2
1	1	1	2	3	2	2	12	2	1	2	2	2	9	2	2	3	7	2	2	4
5	5	5	4	5	5	3	32	4	5	5	5	5	24	5	3	5	13	5	5	10
2	1	1	1	3	2	2	12	4	4	4	4	4	20	4	4	4	12	1	1	2
3	3	1	1	2	2	5	17	2	4	2	4	5	17	2	2	4	8	2	5	7
1	1	3	3	3	2	1	14	3	5	1	1	5	15	1	1	1	3	1	2	3
2	1	1	1	2	1	2	10	1	2	2	2	2	9	1	1	2	4	1	1	2
1	1	1	1	1	1	1	7	2	1	1	1	1	6	1	1	2	4	1	1	2
2	2	2	1	1	1	2	11	2	2	3	3	3	13	3	3	3	9	3	2	5
1	1	1	1	3	2	3	12	1	1	1	1	2	6	1	1	4	6	3	3	6
1	1	1	1	2	1	1	8	1	1	2	1	2	7	2	2	2	6	1	1	2
2	2	1	2	2	2	2	13	3	5	2	5	5	20	3	3	3	9	3	2	5
1	2	1	2	2	2	2	12	5	1	5	5	5	21	2	2	2	6	2	1	3
4	3	1	1	2	2	2	15	2	2	2	2	4	12	2	2	2	6	2	2	4
1	1	1	1	2	1	1	8	1	2	1	1	1	6	2	2	2	6	2	2	4
2	3	2	2	1	2	2	14	2	1	2	3	3	11	2	2	2	6	3	2	5
1	1	1	1	1	1	1	7	1	1	1	1	1	5	1	2	2	5	1	1	2
1	1	1	1	1	1	1	7	1	5	5	5	3	19	3	3	3	9	3	3	6
1	1	1	2	1	1	1	8	3	3	4	3	4	17	2	2	3	7	2	2	4
2	2	2	2	4	4	1	17	2	2	2	2	2	10	4	4	4	12	4	5	9
4	2	2	2	3	2	2	17	3	4	2	2	2	13	1	2	3	6	2	2	4
3	3	3	3	3	3	3	21	3	3	3	3	3	15	3	3	3	9	3	3	6
2	2	2	2	2	2	1	13	5	5	5	5	5	25	1	1	3	5	1	1	2
1	1	1	1	2	1	1	8	2	2	3	4	5	16	3	3	5	11	1	1	2
2	2	2	3	3	3	3	18	2	2	3	3	3	13	3	3	3	9	3	3	6
1	1	1	1	2	2	2	10	2	3	2	2	2	11	2	2	2	6	2	2	4
1	1	1	1	1	1	1	7	1	2	1	1	1	6	1	2	1	4	1	1	2
3	3	3	3	3	3	3	21	3	3	3	3	3	15	3	3	3	9	3	3	6
1	2	1	1	3	2	2	12	2	2	1	1	4	10	1	2	3	6	2	1	3
1	1	1	1	2	1	1	8	2	2	1	1	1	7	1	1	2	4	2	2	4
2	2	1	1	2	2	2	12	2	2	1	1	1	7	2	2	2	6	2	2	4
2	1	1	3	2	2	2	13	3	2	3	3	4	15	4	4	4	12	4	4	8
1	1	1	1	2	2	1	9	2	3	1	2	3	11	2	2	2	6	1	1	2
2	2	1	2	2	2	2	13	3	1	2	2	2	10	3	3	3	9	3	2	5
3	1	2	2	2	3	1	14	5	1	2	2	3	13	3	3	5	11	2	2	4
1	1	1	1	1	1	1	7	5	5	1	1	5	17	1	1	1	3	1	1	2
3	3	3	3	3	3	3	21	3	3	3	3	3	15	3	3	3	9	3	3	6
1	3	1	3	4	5	5	22	5	3	3	3	3	17	3	3	3	9	3	3	6
1	1	1	1	1	1	1	7	4	5	2	3	3	17	3	3	4	10	1	1	2
1	1	1	1	1	1	1	7	1	1	1	1	1	5	3	3	3	9	3	3	6
1	1	1	1	1	1	1	7	3	3	2	2	3	13	1	1	1	3	1	1	2
1	1	1	1	2	1	1	8	2	4	4	4	4	18	4	4	4	12	1	1	2
2	2	2	2	2	2	2	14	2	2	2	2	2	10	2	2	2	6	2	2	4
1	1	1	1	1	1	1	7	3	5	2	3	5	18	2	2	5	9	1	1	2
2	1	1	3	3	3	2	15	3	4	2	2	2	13	3	3	3	9	3	3	6
1	1	1	1	1	1	1	7	1	1	2	2	3	9	2	3	3	8	3	2	5
1	1	1	1	1	1	1	7	1	5	1	1	5	13	1	1	1	3	1	1	2
1	1	1	1	1	1	1	7	2	3	2	2	2	11	1	1	3	5	1	1	2
3	3	3	3	3	3	3	21	3	3	3	3	3	15	3	3	3	9	3	3	6
1	1	1	1	2	1	2	9	1	5	1	3	3	13	4	4	4	12	1	1	2
3	3	3	3	3	3	3	21	3	3	3	3	3	15	3	3	3	9	3	3	6
1	1	1	1	2	2	2	10	2	2	1	1	1	7	1	1	2	4	2	2	4
2	2	1	1	2	2	2	12	5	5	5	5	5	25	4	4	4	12	2	2	4
3	3	3	3	3	3	3	21	3	3	3	3	3	15	3	3	3	9	3	3	6
1	1	1	2	2	2	2	11	2	2	2	2	2	10	2	2	2	6	2	2	4
1	1	1	2	2	2	2	11	2	2	2	1	2	9	3	2	2	7	2	2	4
1	1	1	1	2	1	1	8	1	2	1	1	1	6	1	1	2	4	2	1	3
2	1	1	2	2	2	1	11	5	1	2	3	1	12	1	1	3	5	1	1	2
1	1	1	1	1	1	1	7	1	5	5	3	5	19	1	1	5	7	5	5	10
1	1	1	1	2	2	3	11	3	3	2	2	3	13	2	2	3	7	1	1	2
2	2	1	5	5	3	2	20	1	5	3	2	3	14	1	1	2	4	2	1	3
1	1	1	1	2	2	1	9	2	2	2	2	2	10	2	1	2	5	1	1	2
1	2	2	1	1	1	1	9	2	2	2	1	2	9	1	1	1	3	2	2	4
1	1	1	2	2	1	2	10	2	4	1	1	4	12	1	1	3	5	2	1	3
1	1	1	1	2	1	1	8	5	3	1	5	3	17	1	1	3	5	1	1	2
1	1	1	1	1	1	2	8	3	1	2	2	4	12	1	4	4	9	2	2	4
2	1	2	2	2	2	2	13	2	2	2	2	2	10	2	2	2	6	2	2	4
2	2	3	3	3	3	3	19	3	3	3	3	3	15	3	3	3	9	3	3	6
2	1	1	1	1	1	1	8	1	1	1	1	1	5	1	1	1	3	1	3	4
3	3	3	3	3	3	3	21	3	3	3	3	3	15	3	3	3	9	3	3	6
3	2	1	1	2	2	2	13	2	2	1	1	2	8	3	3	2	8	3	3	6
2	2	1	1	2	2	2	12	2	2	2	2	2	10	2	2	2	6	2	2	4
1	1	1	2	2	1	1	9	5	5	5	5	5	25	2	2	3	7	2	2	4
1	1	1	1	1	1	1	7	3	1	1	2	1	8	1	2	1	4	1	1	2
1	1	1	2	2	2	3	12	3	5	1	1	2	12	1	1	3	5	1	3	4
1	1	1	1	1	1	1	7	1	1	2	1	2	7	2	2	2	6	1	2	3
1	1	1	1	1	1	1	7	1	3	1	1	3	9	1	1	1	3	1	1	2
1	1	1	3	1	1	1	9	1	1	1	1	3	7	1	1	2	4	1	1	2
3	3	3	3	3	3	3	21	3	3	3	3	3	15	3	3	3	9	3	3	6
2	1	1	1	2	2	1	10	2	1	2	2	2	9	2	2	2	6	2	2	4
1	1	1	2	2	2	1	10	3	3	2	2	2	12	2	2	2	6	2	2	4
2	2	2	2	2	2	2	14	2	2	2	2	2	10	2	2	2	6	2	2	4
2	2	2	2	2	2	2	14	2	2	2	2	2	10	2	2	2	6	2	2	4
3	2	1	1	2	1	1	11	3	4	2	2	2	13	1	1	1	3	2	2	4
2	3	1	3	3	3	3	18	3	4	2	3	5	17	3	3	4	10	3	4	7
3	3	2	4	3	2	2	19	4	3	3	3	4	17	3	3	3	9	1	2	3
2	2	1	1	2	2	1	11	5	5	2	2	5	19	2	3	3	8	3	2	5
3	2	1	1	3	1	3	14	5	3	2	1	5	16	3	2	3	8	1	2	3
2	2	3	2	2	2	2	15	2	4	3	3	2	14	2	1	2	5	1	2	3
3	3	1	3	2	2	3	17	2	2	2	2	2	10	1	1	2	4	2	2	4
3	1	1	2	3	3	2	15	3	1	1	1	3	9	1	3	2	6	2	1	3
2	2	1	1	2	3	2	13	2	4	3	3	3	15	2	2	3	7	1	1	2
1	1	1	1	1	1	1	7	2	2	2	2	2	10	2	2	3	7	2	2	4
2	1	1	1	2	1	4	12	1	2	1	2	4	10	1	1	2	4	2	2	4
1	1	1	1	2	2	3	11	3	5	2	3	5	18	1	1	1	3	1	1	2
3	3	3	3	3	3	3	21	3	3	3	3	3	15	3	3	3	9	3	3	6
1	1	1	2	2	2	1	10	1	1	1	1	3	7	2	1	2	5	1	1	2
2	3	2	2	2	2	2	15	3	3	3	3	4	16	3	1	5	9	1	1	2
1	1	1	2	2	1	1	9	1	1	1	1	2	6	1	1	3	5	1	1	2
1	1	1	1	1	1	2	8	2	1	1	1	1	6	2	2	2	6	1	1	2
3	3	3	3	4	4	3	23	2	5	2	3	3	15	2	2	2	6	2	1	3
1	1	1	1	3	2	2	11	1	3	1	1	2	8	2	2	2	6	2	2	4
2	1	1	1	2	2	2	11	2	1	1	1	3	8	2	1	2	5	1	1	2
1	1	1	2	1	1	1	8	3	2	2	2	2	11	2	2	2	6	2	2	4
3	3	3	3	3	3	3	21	3	3	3	3	3	15	3	3	3	9	3	3	6
2	1	1	1	1	1	2	9	1	1	2	2	4	10	1	1	1	3	1	1	2
1	1	1	2	2	2	2	11	5	5	5	5	5	25	2	2	4	8	1	2	3
1	1	1	2	1	1	1	8	1	2	1	2	1	7	1	1	1	3	1	1	2
1	1	1	1	1	1	1	7	2	2	2	2	2	10	2	2	2	6	2	2	4
1	1	1	1	1	2	1	8	3	1	1	1	1	7	1	1	1	3	1	1	2
2	1	1	1	2	2	1	10	4	1	2	3	3	13	4	3	3	10	1	1	2
1	1	1	1	2	2	1	9	2	3	2	2	2	11	2	2	2	6	2	2	4
4	3	2	3	5	3	3	23	2	3	3	3	5	16	1	1	3	5	4	3	7
